# Supplementary material
Source: PubMed Central journal article supplement (PMC2836539)
Supplement: NIHMS169932-supplement-Supplemental_Data.pdf [file NIHMS169932-supplement-Supplemental_Data.pdf]

Supplementary Data

Formation and transformations of oxidatively  
truncated ether phospholipids in small  
unilamellar vesicles

*Xi Chen<sup>1</sup>, Wujuan Zhang<sup>1</sup>, James Laird<sup>1</sup>, Stanley L. Hazen<sup>2, 3, 4</sup>, and Robert G. Salomon<sup>1</sup>*

<sup>1</sup>Department of Chemistry, Case Western Reserve University, Cleveland, OH 44106

<sup>2</sup>Department of Cell Biology, <sup>3</sup>Department of Cardiovascular Medicine, <sup>4</sup>Center for Cardiovascular  
Diagnostics and Prevention, Cleveland Clinic, Cleveland, OH 44195

## Supporting information

### Total syntheses of oxPAFs

|                                                                                                                                                              |        |
|--------------------------------------------------------------------------------------------------------------------------------------------------------------|--------|
|                                                                                                                                                              | S6-S19 |
| <b>Figure S1.</b> $^1\text{H-NMR}$ (400 M, $\text{CDCl}_3+\text{CD}_3\text{OD}$ ) of 1-O-Hexadecyl-2-(4-pentenoyl)-sn-glycero-3-phosphatidylcholine (8a).    | S20    |
| <b>Figure S2.</b> $^{13}\text{C-NMR}$ (100 M, $\text{CDCl}_3+\text{CD}_3\text{OD}$ ) of 1-O-Hexadecyl-2-(4-pentenoyl)-sn-glycero-3-phosphatidylcholine (8a). | S21    |
| <b>Figure S3.</b> $^1\text{H-NMR}$ (400 M, $\text{CDCl}_3+\text{CD}_3\text{OD}$ ) of 1-O-Hexadecyl-2-(5-hexenoyl)-sn-glycero-3-phosphatidylcholine (8b).     | S22    |
| <b>Figure S4.</b> $^{13}\text{C-NMR}$ (100 M, $\text{CDCl}_3+\text{CD}_3\text{OD}$ ) of 1-O-Hexadecyl-2-(5-hexenoyl)-sn-glycero-3-phosphatidylcholine (8b).  | S23    |
| <b>Figure S5.</b> $^1\text{H-NMR}$ (400 M, $\text{CDCl}_3+\text{CD}_3\text{OD}$ ) of 1-O-Hexadecyl-2-(9-decenoyl)-sn-glycero-3-phosphatidylcholine (8c).     | S24    |
| <b>Figure S6.</b> $^{13}\text{C-NMR}$ (100 M, $\text{CDCl}_3+\text{CD}_3\text{OD}$ ) of 1-O-Hexadecyl-2-(9-decenoyl)-sn-glycero-3-phosphatidylcholine (8c).  | S25    |
| <b>Figure S7.</b> $^1\text{H-NMR}$ (400 M, $\text{CDCl}_3+\text{CD}_3\text{OD}$ ) of OB-PAF (2a).                                                            | S26    |
| <b>Figure S8.</b> $^{13}\text{C-NMR}$ (75 M, $\text{CDCl}_3$ ) of OB-PAF (2a).                                                                               | S27    |
| <b>Figure S9.</b> $^1\text{H-NMR}$ (400 M, $\text{CDCl}_3+\text{CD}_3\text{OD}$ ) of OV-PAF (2b).                                                            | S28    |
| <b>Figure S10.</b> $^{13}\text{C-NMR}$ (75 M, $\text{CDCl}_3$ ) of OV-PAF (2b).                                                                              | S29    |
| <b>Figure S11.</b> $^1\text{H-NMR}$ (400 M, $\text{CDCl}_3+\text{CD}_3\text{OD}$ ) of ON-PAF (2c).                                                           | S30    |
| <b>Figure S12.</b> $^{13}\text{C-NMR}$ (75 M, $\text{CDCl}_3$ ) of ON-PAF (2c).                                                                              | S31    |
| <b>Figure S13.</b> $^1\text{H-NMR}$ (400 M, $\text{CDCl}_3+\text{CD}_3\text{OD}$ ) of S-PAF (3a).                                                            | S32    |
| <b>Figure S14.</b> $^{13}\text{C-NMR}$ (75 M, $\text{CDCl}_3+\text{CD}_3\text{OD}$ ) of S-PAF (3a).                                                          | S33    |
| <b>Figure S15.</b> $^1\text{H-NMR}$ (400 M, $\text{CDCl}_3+\text{CD}_3\text{OD}$ ) of G-PAF (3b).                                                            | S34    |

|                                                                                                                                                                        |     |
|------------------------------------------------------------------------------------------------------------------------------------------------------------------------|-----|
| <b>Figure S16.</b> $^{13}\text{C}$ -NMR (100 M, $\text{CDCl}_3+\text{CD}_3\text{OD}$ ) of G-PAF (3b).                                                                  | S35 |
| <b>Figure S17.</b> $^1\text{H}$ -NMR (400 M, $\text{CDCl}_3+\text{CD}_3\text{OD}$ ) of A-PAF (3c).                                                                     | S36 |
| <b>Figure S18.</b> $^{13}\text{C}$ -NMR (100 M, $\text{CDCl}_3+\text{CD}_3\text{OD}$ ) of A-PAF (3c).                                                                  | S37 |
| <b>Figure S19.</b> $^1\text{H}$ -NMR (200 M, $\text{CDCl}_3$ ) of 1-O-Hexadecyl-2-[3-(2-furyl)propanoyl]-sn-glycero-3-phosphatidylcholine (12a).                       | S38 |
| <b>Figure S20.</b> $^{13}\text{C}$ -NMR (50 M, $\text{CDCl}_3$ ) of 1-O-Hexadecyl-2-[3-(2-furyl)propanoyl]-sn-glycero-3-phosphatidylcholine (12a).                     | S39 |
| <b>Figure S21.</b> $^1\text{H}$ -NMR (400 M, $\text{CDCl}_3+\text{CD}_3\text{OD}$ ) of 1-O-Hexadecyl-2-[4-(2-furyl)butanoyl]-sn-glycero-3-phosphatidylcholine (12b).   | S40 |
| <b>Figure S22.</b> $^{13}\text{C}$ -NMR (50 M, $\text{CDCl}_3$ ) of 1-O-Hexadecyl-2-[4-(2-furyl)butanoyl]-sn-glycero-3-phosphatidylcholine (12b).                      | S41 |
| <b>Figure S23.</b> $^1\text{H}$ -NMR (200 M, $\text{CDCl}_3+\text{CD}_3\text{OD}$ ) of 1-O-Hexadecyl-2-[8-(2-furyl)octanoyl]-sn-glycero-3-phosphatidylcholine (12c).   | S42 |
| <b>Figure S24.</b> $^{13}\text{C}$ -NMR (50 M, $\text{CDCl}_3+\text{CD}_3\text{OD}$ ) of 1-O-Hexadecyl-2-[8-(2-furyl)octanoyl]-sn-glycero-3-phosphatidylcholine (12c). | S43 |
| <b>Figure S25.</b> $^1\text{H}$ -NMR (400 M, $\text{CDCl}_3$ ) of KOHA-PAF (6a).                                                                                       | S44 |
| <b>Figure S26.</b> $^{13}\text{C}$ -NMR (100 M, $\text{CDCl}_3$ ) of KOHA-PAF (6a).                                                                                    | S45 |
| <b>Figure S27.</b> $^1\text{H}$ -NMR (200 M, $\text{CDCl}_3$ ) of KOOA-PAF (6b).                                                                                       | S46 |
| <b>Figure S28.</b> $^{13}\text{C}$ -NMR (50 M, $\text{CDCl}_3$ ) of KOOA-PAF (6b).                                                                                     | S47 |
| <b>Figure S29.</b> $^1\text{H}$ -NMR (300 M, $\text{CDCl}_3+\text{CD}_3\text{OD}$ ) of KODA-PAF (6c).                                                                  | S48 |
| <b>Figure S30.</b> $^{13}\text{C}$ -NMR (50 M, $\text{CDCl}_3+\text{CD}_3\text{OD}$ ) of KODA-PAF (6c).                                                                | S49 |
| <b>Figure S31.</b> $^1\text{H}$ -NMR (400 M, $\text{CDCl}_3+\text{CD}_3\text{OD}$ ) of KHdiA-PAF (7a).                                                                 | S50 |
| <b>Figure S32.</b> $^{13}\text{C}$ -NMR (50 M, $\text{CDCl}_3+\text{CD}_3\text{OD}$ ) of KHdiA-PAF (7a).                                                               | S51 |

- Figure S33.**  $^1\text{H}$ -NMR (200 M,  $\text{CDCl}_3+\text{CD}_3\text{OD}$ ) of KODiA-PAF (7b). S52
- Figure S34.**  $^{13}\text{C}$ -NMR (50 M,  $\text{CDCl}_3+\text{CD}_3\text{OD}$ ) of KODiA-PAF (7b). S53
- Figure S35.**  $^1\text{H}$ -NMR (400 M,  $\text{CDCl}_3+\text{CD}_3\text{OD}$ ) of KDdiA-PAF (7c). S54
- Figure S36.**  $^{13}\text{C}$ -NMR (50 M,  $\text{CDCl}_3+\text{CD}_3\text{OD}$ ) of KDdiA-PAF (7c). S55
- Figure S37.**  $^1\text{H}$ -NMR (400 M,  $\text{CDCl}_3+\text{CD}_3\text{OD}$ ) of  
1-O-Hexadecyl-2-[6-(2, 2-dimethyl-1, 3-dioxolan-4-yl)-4-(tetrahydro-2H-pyran-2-yloxy)hex-5-enoyl]-sn-glycero-3-phosphatidylcholine (10a). S56
- Figure S38.**  $^{13}\text{C}$ -NMR (100 M,  $\text{CDCl}_3+\text{CD}_3\text{OD}$ ) of  
1-O-Hexadecyl-2-[6-(2, 2-dimethyl-1, 3-dioxolan-4-yl)-4-(tetrahydro-2H-pyran-2-yloxy)hex-5-enoyl]-sn-glycero-3-phosphatidylcholine (10a). S57
- Figure S39.**  $^1\text{H}$ -NMR (400 M,  $\text{CDCl}_3+\text{CD}_3\text{OD}$ ) of  
1-O-Hexadecyl-2-[7-(2, 2-dimethyl-1, 3-dioxolan-4-yl)-5-(tetrahydro-2H-pyran-2-yloxy)hept-6-enoyl]-sn-glycero-3-phosphatidylcholine (10b). S58
- Figure S40.**  $^{13}\text{C}$ -NMR (50 M,  $\text{CDCl}_3$ ) of  
1-O-Hexadecyl-2-[7-(2, 2-dimethyl-1, 3-dioxolan-4-yl)-5-(tetrahydro-2H-pyran-2-yloxy)hept-6-enoyl]-sn-glycero-3-phosphatidylcholine (10b). S59
- Figure S41.**  $^1\text{H}$ -NMR (400 M,  $\text{CDCl}_3+\text{CD}_3\text{OD}$ ) of

1-O-Hexadecyl-2-[11-(2, 2-dimethyl-1, 3-dioxolan-4-yl)-9-(tetrahydro-2H-pyran-2-yloxy)-undec-10-enoyl]-sn-glycero-3-phosphatidylcholine (10c). S60

**Figure S42.**  $^{13}\text{C}$ -NMR (100 M,  $\text{CDCl}_3+\text{CD}_3\text{OD}$ ) of

1-O-Hexadecyl-2-[11-(2, 2-dimethyl-1, 3-dioxolan-4-yl)-9-(tetrahydro-2H-pyran-2-yloxy)-undec-10-enoyl]-sn-glycero-3-phosphatidylcholine (10c). S61

**Figure S43.**  $^1\text{H}$ -NMR (400 M,  $\text{CDCl}_3+\text{CD}_3\text{OD}$ ) of HOHA-PAF (4a). S62

**Figure S44.**  $^{13}\text{C}$ -NMR (100 M,  $\text{CDCl}_3+\text{CD}_3\text{OD}$ ) of HOHA-PAF (4a). S63

**Figure S45.**  $^1\text{H}$ -NMR (400 M,  $\text{CDCl}_3+\text{CD}_3\text{OD}$ ) of HOOA-PAF (4b). S64

**Figure S46.**  $^{13}\text{C}$ -NMR (50 M,  $\text{CDCl}_3+\text{CD}_3\text{OD}$ ) of HOOA-PAF (4b). S65

**Figure S47.**  $^1\text{H}$ -NMR (400 M,  $\text{CDCl}_3+\text{CD}_3\text{OD}$ ) of HODA-PAF (4c). S66

**Figure S48.**  $^{13}\text{C}$ -NMR (100 M,  $\text{CDCl}_3+\text{CD}_3\text{OD}$ ) of HODA-PAF (4c). S67

**Figure S49.**  $^1\text{H}$ -NMR (400 M,  $\text{CDCl}_3+\text{CD}_3\text{OD}$ ) of HHdiA-PAF (5a). S68

**Figure S50.**  $^{13}\text{C}$ -NMR (50 M,  $\text{CDCl}_3+\text{CD}_3\text{OD}$ ) of HHdiA-PAF (5a). S69

**Figure S51.**  $^1\text{H}$ -NMR (400 M,  $\text{CDCl}_3+\text{CD}_3\text{OD}$ ) of HOdiA-PAF (5b). S70

**Figure S52.**  $^{13}\text{C}$ -NMR (100 M,  $\text{CDCl}_3+\text{CD}_3\text{OD}$ ) of HOdiA-PAF (5b). S71

**Figure S53.**  $^1\text{H}$ -NMR (400 M,  $\text{CDCl}_3+\text{CD}_3\text{OD}$ ) of HDdiA-PAF (5c). S72

**Figure S54.**  $^{13}\text{C}$ -NMR (100 M,  $\text{CDCl}_3+\text{CD}_3\text{OD}$ ) of HDdiA-PAF (5c). S73

|                                                                                                                 |     |
|-----------------------------------------------------------------------------------------------------------------|-----|
| <b>Figure S55.</b> $^1\text{H}$ -NMR (400 M, $\text{CDCl}_3+\text{CD}_3\text{OD}$ ) of $\text{C}_{13}$ -PAF.    | S74 |
| <b>Figure S56.</b> $^{13}\text{C}$ -NMR (100 M, $\text{CDCl}_3+\text{CD}_3\text{OD}$ ) of $\text{C}_{13}$ -PAF. | S75 |
| <b>Figure S57.</b> $^1\text{H}$ -NMR (400 M, $\text{CDCl}_3+\text{CD}_3\text{OD}$ ) of LA-PAF.                  | S76 |
| <b>Figure S58.</b> $^{13}\text{C}$ -NMR (100 M, $\text{CDCl}_3+\text{CD}_3\text{OD}$ ) of LA-PAF.               | S77 |
| <b>Figure S59.</b> Microphosphorus assay calibration curve.                                                     | S78 |
| <b>Table S1.</b> Percent Polyunsaturated Lipids in Various Human Tissues.                                       | S79 |

**1-O-Hexadecyl-2-(4-pentenoyl)-*sn*-glycero-3-phosphatidylcholine (8a).** 1-O-Hexadecyl-2-lyso-*sn*-glycero-3-phosphatidylcholine (15 mg, 0.03 mmol), that was dried on a vacuum pump equipped with a dry ice-acetone trap overnight at room temperature, was dissolved in freshly distilled  $\text{CHCl}_3$  (2 mL). 4-pentenoic acid (12.5 mg, 0.12 mmol), dicyclohexylcarbodiimide (DCC, 37.1 mg, 0.18 mmol) and N,N-dimethylaminopyridine (DMAP, 3.7 mg, 0.03 mmol) were added. The mixture was stirred at room temperature for 96 h under argon. The solvent was then removed by rotary evaporation, and the residue was purified by flash chromatography on silica with  $\text{CHCl}_3/\text{MeOH}/\text{H}_2\text{O}$  (16/9/1, TLC:  $R_f = 0.42$ ) to give **8a** (12.1 mg, 70%).  $^1\text{H}$  NMR ( $\text{CDCl}_3/\text{CD}_3\text{OD} = 1/1$ , 400 MHz):  $\delta$  5.73-5.86(1H), 5.09-5.16(1H), 4.94-5.07(2H), 4.19-4.31 (2H), 3.93-4.07(2H), 3.58-3.64(4H), 3.39-3.52(2H), 3.22(9H), 2.46(t,  $J = 7.0$  Hz, 2H), 2.38(t,  $J = 6.9$  Hz, 2H), 1.50-1.60(2H), 1.16-1.35(26H), 0.89(t,  $J = 6.8$  Hz, 3H). HRMS (FAB):  $m/z$  calcd for  $\text{C}_{29}\text{H}_{59}\text{NO}_7\text{P}^+$  ( $\text{MH}^+$ ) 564.4029, found 564.4010.

**1-O-Hexadecyl-2-(5-hexenoyl)-*sn*-glycero-3-phosphatidylcholine (8b).** A procedure analogous to that described above for **8a** was used to convert 5-hexenoic acid into **8b** (71%) TLC:  $R_f = 0.17$  in  $\text{CHCl}_3/\text{MeOH}/\text{H}_2\text{O}$  (16/9/1):  $^1\text{H}$  NMR ( $\text{CDCl}_3/\text{CD}_3\text{OD} = 1/1$ , 400 MHz):  $\delta$  5.69-5.80(1H), 5.08-5.18(1H), 4.96-5.06(2H), 4.19-4.29(2H), 3.92-4.06(2H), 3.56-3.65(4H), 3.39-3.52(2H), 3.22(s, 9H), 2.37(t,  $J = 7.5$  Hz, 3H), 2.11(td,  $J = 7.7$  Hz, 6.8 Hz, 2H), 1.65-1.78(2H), 1.49-1.60(2H), 1.19-1.34(26H), 0.88(t,  $J = 6.8$  Hz, 3H). HRMS (FAB):  $m/z$  calcd for  $\text{C}_{30}\text{H}_{61}\text{NO}_7\text{P}^+$  ( $\text{MH}^+$ ) 578.4186, found 578.4196.

**1-O-Hexadecyl-2-(9-decenoyl)-sn-glycero-3-phosphatidylcholine (8c).** A procedure analogous to that described above for **8a** was used to convert 9-decenoic acid into **8c** (79%) TLC:  $R_f = 0.29$  CHCl<sub>3</sub>/MeOH/H<sub>2</sub>O (16/9/1): <sup>1</sup>H NMR (CDCl<sub>3</sub>/CD<sub>3</sub>OD = 1/1, 400 MHz):  $\delta$  5.69-5.82(1H), 5.16(m,1H), 4.96-5.02(2H), 4.17-4.27(2H), 3.92-4.05(2H), 3.56-3.65(4H), 3.38-3.52(2H), 3.23(s, 9H), 2.35(t, J = 7.5 Hz, 2H), 2.04(td, J = 7.8 Hz, 6.7 Hz, 2H), 1.54-1.63(2H), 1.46-1.54(2H), 1.17-1.39(34H), 0.89(t, J = 6.6 Hz, 3H). HRMS (FAB): m/z calcd for C<sub>34</sub>H<sub>69</sub>NO<sub>7</sub>P<sup>+</sup> (MH<sup>+</sup>) 634.4811, found 634.4813.

**1-O-Hexadecyl-2-(4-oxobutyryl)-sn-glycero-3-phosphatidylcholine (OB-PAF, 2a).** A solution of the compound **8a** (12.1 mg, 0.021 mmol) in 2 mL of a 2:1 mixture of MeOH/CH<sub>2</sub>Cl<sub>2</sub> was cooled to -78 °C with magnetic stirring. Ozone was bubbled through the solution until a blue color appeared and persisted for another 20 min. The solution was purged with N<sub>2</sub> to remove the excess ozone. While still at -78 °C, Me<sub>2</sub>S (17  $\mu$ L) was added, and the solution was then allowed to warm to room temperature. The solvents were removed by rotary evaporation with heptane (3 $\times$ 5 mL) to afford aldehyde phospholipid **2a** (7.6 mg, 63%). <sup>1</sup>H NMR (CDCl<sub>3</sub>/CD<sub>3</sub>OD = 1/1, 400 MHz):  $\delta$  9.77(1H), 5.12-5.22(1H), 4.21-4.33(2H), 3.93-4.09(2H), 3.57-3.65(4H), 3.41-3.50(2H), 3.22(s, 9H), 2.56-2.92(2H), 2.42-2.54(1H), 1.79-2.00(1H), 1.55(t, J = 6.5 Hz, 2H), 1.24-1.36(26H), 0.89(t, J = 6.7 Hz, 3H). HRMS (FAB): m/z calcd for C<sub>28</sub>H<sub>57</sub>NO<sub>8</sub>P<sup>+</sup> (MH<sup>+</sup>) 566.3822, found 566.3830.

**1-O-Hexadecyl-2-(5-oxovaleroyl)-sn-glycero-3-phosphatidylcholine (OV-PAF, 2b).** This phospholipid was prepared similarly to **2a** using the



compound **8b** (17mg, 0.029 mmol) and Me<sub>2</sub>S (22 μL) to give **2b** (14.7 mg, 87%). <sup>1</sup>H NMR (CDCl<sub>3</sub>, 400 MHz): δ 9.69-9.71(s, 1H), 5.04-5.18(1H), 4.23(s, 2H), 3.81-4.04(2H), 3.68-3.79(2H), 3.40-3.56(2H), 3.25-3.33(11H), 2.49(t, J = 7.0, 2H), 2.22-2.41(2H), 1.86(tt, J=7.0, 7.0, 2H), 1.44(t, J = 6.3 Hz, 2H), 1.11-1.31(26H), 0.81(t, J = 6.6 Hz, 3H). HRMS (FAB): m/z calcd for C<sub>29</sub>H<sub>59</sub>NO<sub>8</sub>P<sup>+</sup> (MH<sup>+</sup>) 580.3978, found 580.3944.

**1-O-Hexadecyl-2-(9-oxononanoyl)-sn-glycero-3-phosphatidylcholine (ON-PAF, 2c).** This aldehyde was prepared similarly to **2a** using the compound **8c** (35 mg, 0.055 mmol) and Me<sub>2</sub>S (42 μL) to give **2c** (25 mg, 71%). <sup>1</sup>H NMR (CDCl<sub>3</sub>, 400 MHz): δ 9.74(t, J = 1.75 Hz, 1H), 5.15(m, 1H), 4.23-4.33(2H), 3.89-4.01(2H), 3.74-3.81(2H), 3.49-3.65(2H), 3.43-3.49(2H), 3.39(s, 9H), 2.45(td, J = 7.3, 1.75 Hz, 2H), 2.33(t, J = 7.4 Hz, 2H), 1.63-1.65(4H), 1.53(t, J = 6.8 Hz, 2H), 1.23-1.38(32H), 0.90(t, J = 6.8 Hz, 3H). HRMS (FAB): m/z calcd for C<sub>33</sub>H<sub>67</sub>NO<sub>8</sub>P<sup>+</sup> (MH<sup>+</sup>) 636.4604, found 636.4529.

**1-O-Hexadecyl-2-succinoyl-sn-glycero-3-phosphatidylcholine (S-PAF, 3a).** A mixture of lyso-PAF (15 mg, 0.031 mmol) and succinic anhydride (22 mg, 0.22 mmol), that was dried on a vacuum pump overnight at room temperature, was dissolved in dry CHCl<sub>3</sub> (1.5 mL). DMAP (12 mg, 0.098 mmol) was added to the solution. The mixture was then stirred at room temperature under argon for 96 h. The mixture was concentrated, and the residue was chromatographed on silica with CHCl<sub>3</sub>/MeOH/H<sub>2</sub>O (16/9/1, TLC: R<sub>f</sub> = 0.05) to give **3a** (10 mg, 55%). <sup>1</sup>H

NMR (CDCl<sub>3</sub>/CD<sub>3</sub>OD = 1:1, 400 MHz):  $\delta$  5.17(m, 1H), 4.26(s, 2H), 3.92-4.10(2H), 3.54-3.60(4H), 3.37-3.52(2H), 3.22(s, 9H), 2.50-2.70(4H), 1.55(t, J = 6.9 Hz, 2H), 1.21-1.27(26H), 0.89(t, J = 6.8 Hz, 3H). HRMS (FAB): m/z calcd for C<sub>28</sub>H<sub>57</sub>NO<sub>9</sub>P<sup>+</sup> (MH<sup>+</sup>) 582.3771, found 582.3771.

**1-O-Hexadecyl-2-glutaroyl-*sn*-glycero-3-phosphatidylcholine (G-PAF, 3b).** This acid phospholipid was prepared similarly to **3a** using lyso-PAF (20mg, 0.042 mmol), glutaric anhydride (38.3 mg, 0.34 mmol) and DMAP (5.1 mg, 0.042 mmol) in dry CHCl<sub>3</sub> (2 mL). The crude product was purified by flash chromatography on a silica gel column with CHCl<sub>3</sub>/MeOH/H<sub>2</sub>O (15/9/1, TLC: R<sub>f</sub> = 0.21) to afford **3b** (12.4 mg, 50%). <sup>1</sup>H NMR (CDCl<sub>3</sub>/CD<sub>3</sub>OD = 1:1, 400 MHz):  $\delta$  5.18(m, 1H), 4.18-4.25(s, 2H), 3.94-4.08 (2H), 3.58-3.64(4H), 3.39-3.52(2H), 3.22(s, 9H), 2.36-2.48(4H), 1.94(tt, J = 7.0 Hz, 7.0 Hz, 2H), 1.55(t, J = 6.4 Hz, 2H), 1.21-1.31(26H), 0.89(t, J = 6.8Hz, 3H). HRMS (FAB): m/z calcd for C<sub>29</sub>H<sub>59</sub>NO<sub>9</sub>P<sup>+</sup> (MH<sup>+</sup>) 596.3927, found 596.3916.

**1-O-Hexadecyl-2-azelayl-*sn*-glycero-3-phosphatidylcholine (A-PAF, 3c).** To a magnetic stirred solution of ON-PAF (**2c**) (15.2 mg, 0.024 mmol) in t-BuOH-H<sub>2</sub>O (5:1, v/v, 0.4 mL) was added solution containing NaH<sub>2</sub>PO<sub>4</sub> (4.78 mg, 0.035 mmol), 2-methyl-2-butene(136  $\mu$ L, 0.27 mmol, 2M solution in THF), and NaClO<sub>2</sub> (7.23 mg, 0.08 mmol) in t-BuOH-H<sub>2</sub>O (5:1, v/v, 0.4 mL). The resulting mixture was stirred for 2 h at room temperature under Argon. The crude product was purified by flash chromatography on a silica gel column (CHCl<sub>3</sub>/MeOH/H<sub>2</sub>O, 15/9/1, TLC: R<sub>f</sub>= 0.17) to give A-PAF (**3c**, 9.9 mg, 64%). <sup>1</sup>H NMR (CDCl<sub>3</sub>/CD<sub>3</sub>OD = 1:1, 400 MHz):  $\delta$  5.12 (m, 1H), 4.21(s, 2H), 3.88-4.04(2H),

3.53-3.62(4H), 3.35-3.49(2H), 3.19(s, 9H), 2.31(t, J = 7.4 Hz, 4H), 1.64-1.46(6H), 1.35-1.20(32H), 0.85(t, J = 6.8 Hz, 3H). HRMS (FAB): m/z calcd for C<sub>33</sub>H<sub>67</sub>NO<sub>9</sub>P<sup>+</sup> (MH<sup>+</sup>) 652.4553, found 652.4550.

**1-O-Hexadecyl-2-[3-(2-furyl)propanoyl]-sn-glycero-3-phosphatidylcholine (12a).** A mixture of 3-(2-furyl)propionic acid (23 mg, 0.16 mmol) and lyso-PAF (30 mg, 0.062 mmol), that was dried on a vacuum pump equipped with dry ice-acetone trap for 10 h at room temperature, was dissolved in dry CHCl<sub>3</sub> (2 mL, shaken with P<sub>2</sub>O<sub>5</sub> for 0.5 h and distilled). DCC (137 mg, 0.66 mmol) and DMAP (13.7 mg, 0.11 mmol) were added. The mixture was stirred for 48 h under argon. The mixture was then concentrated, and the residue was purified by flash chromatography on silica (CHCl<sub>3</sub>/MeOH/H<sub>2</sub>O, 16:9:1, TLC: R<sub>f</sub> = 0.36) to afford the furyl phospholipid **12a** (32.4 mg, 86%). <sup>1</sup>H NMR (CDCl<sub>3</sub>, 200 MHz): δ 7.28-7.30(1H), 6.26(dd, J = 3.1 Hz, 1.8 Hz, 1H), 6.02(d, J = 3.1 Hz, 1H), 5.15(m, 1H), 4.26(s, 2H), 3.85-3.98(2H), 3.70-3.85(2H), 3.61(s, 2H), 3.50-3.58(2H), 3.33(s, 9H), 2.94(t, J = 7.4 Hz, 2H), 2.66(t, J = 7.7 Hz, 2H), 1.50(2H), 1.20-1.28(22H), 0.87(t, J = 6.6 Hz, 3H). HRMS (FAB): m/z calcd for C<sub>31</sub>H<sub>59</sub>NO<sub>8</sub>P<sup>+</sup> (MH<sup>+</sup>) 604.3978, found 604.3960.

**1-O-Hexadecyl-2-[4-(2-furyl)butanoyl]-sn-glycero-3-phosphatidylcholine (12b).** A procedure analogous to that described above for **12a** was used to convert 4-(2-furyl)butanoic acid into **12b** (85%) TLC: R<sub>f</sub> = 0.40 (CHCl<sub>3</sub>/MeOH/H<sub>2</sub>O, 16:9:1). <sup>1</sup>H NMR (CDCl<sub>3</sub>/CD<sub>3</sub>OD = 1/1, 400 MHz): δ 7.28(d, J = 1.8 Hz, 1H), 6.24(dd, J = 3.1 Hz, 1.8 Hz, 1H), 5.99(d, J = 3.1 Hz, 1H), 5.14(m, 1H), 4.21(bs, 2H), 3.89-4.02(2H),

3.51-3.62(4H), 3.35-3.49(2H), 3.18(bs, 9H), 2.65(t, J = 7.4 Hz, 2H), 2.36(t, J = 7.4 Hz, 2H), 1.93(tt, J = 7.4 Hz, 7.4 Hz, 2H), 1.45-1.56(2H), 1.2-1.3(26H), 0.85(t, J = 6.8 Hz, 3H). HRMS (FAB): m/z calcd for C<sub>32</sub>H<sub>61</sub>NO<sub>8</sub>P<sup>+</sup> (MH<sup>+</sup>) 618.4135, found 618.4140.

**1-O-Hexadecyl-2-[8-(2-furyl)octanoyl]-sn-glycero-3-phosphatidylcholine (12c).** A procedure analogous to that described above for **12a** was used to convert 8-(2-furyl)octanoic acid into **12c** (79%) TLC: R<sub>f</sub> = 0.39 (CHCl<sub>3</sub>/MeOH/H<sub>2</sub>O, 16:9:1). <sup>1</sup>H NMR (CDCl<sub>3</sub>/CD<sub>3</sub>OD = 1/1, 300 MHz): δ 7.27(dd, J = 1.86 Hz, 0.82 Hz, 1H), 6.24(dd, J = 3.12 Hz, 1.84 Hz, 1H), 5.94(dd, J = 3.12 Hz, 0.86 Hz, 1H), 5.14(m, 1H), 4.14-4.30(2H), 3.90-4.02(2H), 3.50-3.62(4H), 3.49-3.37(2H), 3.20(bs, 9H), 2.59(t, J = 7.4 Hz, 2H), 2.33(t, J = 7.3 Hz, 2H), 1.40-1.70(6H), 1.20-1.34(32H), 0.86(t, J = 6.6 Hz, 3H). HRMS (FAB): m/z calcd for C<sub>36</sub>H<sub>69</sub>NO<sub>8</sub>P<sup>+</sup> (MH<sup>+</sup>) 674.4761, found 674.4762.

**1-O-Hexadecyl-2-(4-oxo-7-oxohept-5-enoyl)-sn-glycero-3-phosphatidylcholine (KOHA-PAF, 6a).** N-Bromosuccinimide (NBS, 28.7 mg, 0.16 mmol) and pyridine (18.6 μL, 0.22 mmol) were sequentially added to a solution of furyl phosphatidylcholine **12a** (64.9 mg, 0.11 mmol) in THF/acetone/water (5/4/2) at -20 °C. The resulting mixture was stirred for 1 h at this temperature, and kept at room temperature for 6 h. The solvent was then removed quickly, and the residue was purified on a silica gel column (CHCl<sub>3</sub>/MeOH/H<sub>2</sub>O, 16:9:1, TLC: R<sub>f</sub> = 0.13) affording KOHA-PAF (52.8 mg, 79%). <sup>1</sup>H NMR (CDCl<sub>3</sub>, 400 MHz): δ 9.78(d, J = 7.3 Hz, 1H), 6.97(d, J = 16.2 Hz, 1H), 6.79(dd, J = 16.2 Hz, 7.3 Hz, 1H), 5.09(m, 1H), 4.26(bs, 2H), 3.83-3.99(2H), 3.78(bs, 2H), 3.47-3.51(2H), 3.25-3.42(11H), 2.91-3.11(2H), 2.58-2.79(2H), 1.47(t, J = 6.2 Hz, 2H),

1.14-1.32(26H), 0.83(t, J = 6.8 Hz, 3H). HRMS (FAB): m/z calcd for C<sub>31</sub>H<sub>59</sub>NO<sub>9</sub>P<sup>+</sup> (MH<sup>+</sup>) 620.3922, found 620.3914.

**1-O-Hexadecyl-2-(5-oxo-8-oxooct-6-enoyl)-sn-glycero-3-phosphatidylcholine (KOOA-PAF, 6b).** A procedure analogous to that described above for **6a** was used to convert **12b** into KOOA-PAF (**6b**, 68%): TLC R<sub>f</sub> = 0.20(CHCl<sub>3</sub>/MeOH/H<sub>2</sub>O, 16:9:1). <sup>1</sup>H NMR (CDCl<sub>3</sub>, 200 MHz): δ 9.80(d, J = 7.0 Hz, 1H), 6.97(d, J = 16.1 Hz, 1H), 6.82(dd, J = 16.2 Hz, 6.9 Hz, 1H), 5.16(m, 1H), 4.32(bs, 2H), 3.90(bs, 4H), 3.42-3.60(2H), 3.39(11H), 2.87(t, J = 7.0 Hz, 2H), 2.21-2.60(2H), 1.95(t, J = 6.7Hz, 2H), 1.51(2H), 1.10-1.30(26H), 0.88(t, J = 6.7 Hz, 3H). HRMS (FAB): m/z calcd for C<sub>32</sub>H<sub>61</sub>NO<sub>9</sub>P<sup>+</sup> (MH<sup>+</sup>) 634.4078, found 634.4063.

**1-O-Hexadecyl-2-(9-oxo-12-oxododec-10-enoyl)-sn-glycero-3-phosphatidylcholine (KODA-PAF, 6c).** A procedure analogous to that described above for **6a** was used to convert **12c** into **6c** (KODA-PAF, 70%) TLC: R<sub>f</sub> = 0.17 (CHCl<sub>3</sub>/MeOH/H<sub>2</sub>O, 16:9:1). <sup>1</sup>H NMR (CDCl<sub>3</sub> + CD<sub>3</sub>OD, 300 MHz): δ 9.72 (1H), 6.28-7.04 (2H), 5.13(m, 1H), 4.20(bs, 2H), 3.92(2H), 3.50-3.70(4H), 3.32-3.50(2H), 3.15(9H), 2.65-2.80 (1H), 2.50-2.65(1H), 2.20-2.40(2H), 1.40-1.70(6H), 1.10-1.40(32H), 0.86(3H). HRMS (FAB): m/z calcd for C<sub>36</sub>H<sub>69</sub>NO<sub>9</sub>P<sup>+</sup> (MH<sup>+</sup>) 690.4704, found 690.4704.

**1-O-Hexadecyl-2-(7-carboxy-4-oxohep-5-enoyl)-sn-glycero-3-phosphatidylcholine (KHdiA-PAF, 7a).** To a magnetically stirred solution of KOHA-PAF (**6a**) (11.9 mg, 0.019 mmol) in t-BuOH-H<sub>2</sub>O (5:1, v/v, 1mL) were added NaH<sub>2</sub>PO<sub>4</sub> (3.97 mg, 0.029 mmol), 2-methyl-2-butene (95.8

$\mu\text{L}$ , 0.19 mmol, 2 M solution in THF), and  $\text{NaClO}_2$  (5.27 mg, 0.059 mmol). The resulting mixture was stirred for 2 h at room temperature under Ar. The solvent was removed. The residue was purified by the flash chromatography on a silica gel column ( $\text{CHCl}_3/\text{MeOH}/\text{H}_2\text{O}$ , 16:9:1, TLC:  $R_f = 0.12$ ) to give KHdiA-PAF (7.2 mg, 60%).  $^1\text{H NMR}$  ( $\text{CDCl}_3/\text{CD}_3\text{OD} = 1/1$ , 400 MHz):  $\delta$  6.68-6.75(2H), 5.08(m, 1H), 4.12-4.24(2H), 3.87-4.03(2H), 3.50-3.60(4H), 3.32-3.46(2H), 3.16(bs, 9H), 2.95-3.06(1H), 2.81-2.91(1H), 2.61-2.73(1H), 2.50-2.61(1H), 1.48(t,  $J = 7.1$  Hz, 2H), 1.15-1.30(26H), 0.82(t,  $J = 6.7$  Hz, 3H). HRMS (FAB):  $m/z$  calcd for  $\text{C}_{31}\text{H}_{59}\text{NO}_{10}\text{P}^+$  ( $\text{MH}^+$ ) 636.3871, found 636.3875.

**1-O-Hexadecyl-2-(8-carboxy-5-oxooct-6-enoyl)-sn-glycero-3-phosphatidylcholine (KOdiA-PAF, 7b).** A procedure analogous to that described above for **7a** was used to convert KOOA-PAF (**6b**) into KOdiA-PAF (**7b**, 62%) TLC:  $R_f = 0.12$  ( $\text{CHCl}_3/\text{MeOH}/\text{H}_2\text{O}$ , 16:9:1).  $^1\text{H NMR}$  ( $\text{CDCl}_3/\text{CD}_3\text{OD} = 1/1$ , 200 MHz):  $\delta$  6.76(s, 1H), 6.75(s, 1H), 5.15(m, 1H), 4.24(bs, 2H), 3.92-4.10(2H), 3.50-3.65(4H), 3.35-3.50(2H), 3.21(bs, 9H), 2.74(t,  $J = 7.0$  Hz, 2H), 2.39(t,  $J = 7.4$  Hz, 2H), 1.80-2.00(2H), 1.40-1.65(2H), 1.10-1.40(26H), 0.86(t,  $J = 6.5$  Hz, 3H). HRMS (FAB):  $m/z$  calcd for  $\text{C}_{32}\text{H}_{61}\text{NO}_{10}\text{P}^+$  ( $\text{MH}^+$ ) 650.4028, found 650.4023.

**1-O-Hexadecyl-2-(12-carboxy-9-oxodec-10-enoyl)-sn-glycero-3-phosphatidylcholine (KDdiA-PAF, 7c).** A procedure analogous to that described above for **7a** was used to convert KODA-PAF (**6c**) into KDdiA-PAF (**7c**, 42%) TLC:  $R_f = 0.14$  ( $\text{CHCl}_3/\text{MeOH}/\text{H}_2\text{O}$ , 15:9:1).  $^1\text{H NMR}$  ( $\text{CDCl}_3/\text{CD}_3\text{OD} = 1/1$ , 400 MHz):  $\delta$  6.75(2H), 5.13(m, 1H), 4.23(2H), 3.89-4.04(2H), 3.52-3.65(4H), 3.38-3.51(2H), 3.20(bs, 9H), 2.63(t,  $J = 7.3$

Hz, 2H), 2.32(t, J = 7.3 Hz, 2H), 1.55-1.67(4H), 1.46-1.55(2H), 1.16-1.38(32H), 0.86(t, J = 6.6 Hz, 3H). HRMS (FAB): m/z calcd for  $C_{36}H_{69}NO_{10}P^+$  ( $MH^+$ ) 706.4654, found 706.4640.

**1-O-Hexadecyl-2-[6-(2, 2-dimethyl-1, 3-dioxolan-4-yl)-4-(tetrahydro-2H-pyran-2-yloxy)hex-5-enoyl]-sn-glycero-3-phosphatidylcholine**

**(10a).** A mixture of 4-(2-oxanyloxy)-6-(3,3-dimethyl-2,4-dioxolanyl)hex-5-enoic acid (62 mg, 0.20 mmol) and lyso-PAF (32 mg, 0.067 mmol), that was dried on a vacuum pump equipped with dry ice-acetone trap for 10 h at room temperature, was dissolved in dry  $CHCl_3$  (2 mL, shaken with  $P_2O_5$  for 0.5 h and distilled). DCC (81.7 mg, 0.39 mmol) and DMAP (8.06 mg, 0.067 mmol) were added. The mixture was stirred for 48 h under argon. The mixture was then concentrated by rotary evaporation, and the residue was purified by flash chromatography on silica ( $CHCl_3/MeOH/H_2O$ , 16:9:1, TLC:  $R_f$  = 0.14) to afford HOHA-PAF precursor **10a** (38.4 mg, 75%).  $^1H$  NMR ( $CDCl_3/CD_3OD$  = 1/1, 400 MHz):  $\delta$  5.48-5.90(2H), 5.12(m, 1H), 4.47-4.55(1H), 4.21(2H), 4.04-4.17(2H), 3.89-4.02(2H), 3.77-3.88(1H), 3.52-3.62(5H), 3.35-3.51(4H), 3.15-3.23(9H), 2.33-2.54(2H), 1.74-1.96(3H), 1.62-1.74(2H), 1.45-1.62(5H), 1.39(s, 3H), 1.35(s, 3H), 1.20-1.35(26H), 0.85(t, J = 6.8 Hz, 3H). HRMS (FAB): m/z calcd for  $C_{40}H_{76}NNaO_{11}P^+$  ( $MNa^+$ ) 800.5048, found 800.5048.

**1-O-Hexadecyl-2-[7-(2, 2-dimethyl-1, 3-dioxolan-4-yl)-5-(tetrahydro-2H-pyran-2-yloxy)hept-6-enoyl]-sn-glycero-3-phosphatidylcholine**

**(10b).** A procedure analogous to that described above for **10a** was used to convert

5-(2-oxanyloxy)-7-(3,3-dimethyl-2,4-dioxolanyl)hept-6-enoic acid into the HOOA-PAF precursor **10b** (79%) TLC:  $R_f = 0.28$  ( $\text{CHCl}_3/\text{MeOH}/\text{H}_2\text{O}$ , 16:9:1).  $^1\text{H NMR}$  ( $\text{CDCl}_3$ , 400 MHz):  $\delta$  5.51-5.85(2H), 5.10(m, 1H), 4.53-4.67(1H), 4.45-4.53(1H), 4.28(bs, 2H), 4.00-4.14(2H), 3.86-3.98(2H), 3.73-3.86(3H), 3.49-3.61(3H), 3.38-3.49(3H), 3.36(bs, 9H), 2.24-2.36(t,  $J = 7.7$  Hz, 2H), 1.43-1.87(12H), 1.39(s, 3H), 1.36(s, 3H), 1.20-1.36(26H), 0.85(t,  $J = 6.8$  Hz, 3H). HRMS (FAB):  $m/z$  calcd for  $\text{C}_{41}\text{H}_{79}\text{NO}_{11}\text{P}^+$  ( $\text{MH}^+$ ) 792.5385, found 792.5386.

**1-O-Hexadecyl-2-[11-(2, 2-dimethyl-1,**

**3-dioxolan-4-yl)-9-(tetrahydro-2H-pyran-2-yloxy)-undec-10-enoyl]-*sn*-glycero-3-phosphatidylcholine (10c).** A procedure analogous to that described above for **10a** was used to convert 9-(2-oxanyloxy)-11-(3,3-dimethyl-2,4-dioxolanyl)undec-10-enoic acid into the HODA-PAF precursor **10c** (67%) TLC:  $R_f = 0.28$  ( $\text{CHCl}_3/\text{MeOH}/\text{H}_2\text{O}$ , 16:9:1).  $^1\text{H NMR}$  ( $\text{CDCl}_3/\text{CD}_3\text{OD} = 1/1$ , 400 MHz):  $\delta$  5.45-5.78(2H), 5.05(m, 1H), 4.45(dd,  $J = 13.6$  Hz, 6.2 Hz, 1H), 4.10-4.19(2H), 3.82-4.06(4H), 3.73-3.82(1H), 3.45-3.55(5H), 3.27-3.45(4H), 3.12(s, 9H), 2.24(t,  $J = 7.5$  Hz, 2H), 1.68-1.82(1H), 1.36-1.67(11H), 1.32(s, 3H), 1.29(s, 3H), 1.13-1.26(34H), 0.79(t,  $J = 6.8$  Hz, 3H). HRMS (FAB):  $m/z$  calcd for  $\text{C}_{45}\text{H}_{86}\text{NNaO}_{11}\text{P}^+$  ( $\text{MNa}^+$ ) 870.5831, found 870.5838.

**1-O-Hexadecyl-2-(4-hydroxy-7-oxohept-5-enoyl)-*sn*-glycero-3-phosphatidylcholine (HOHA-PAF, 4a).** A solution of the compound **10a**

(38.4 mg, 0.05mmol) in acetic acid/water (2:1, v/v, 2.2 mL) was stirred magnetically for 4 h at 40 °C, and then the solvent was removed by



rotary evaporation under reduced pressure. The last traces of HOAc were removed by azeotropic distillation with *n*-heptane (3 × 2 mL) under high vacuum. Dry methylene chloride (2 mL) and Na<sub>2</sub>CO<sub>3</sub> (10.4 mg, 0.098 mmol) were added to the residue. The solution was stirred magnetically at -78 °C under an argon atmosphere, and Pb(OAc)<sub>4</sub> (24 mg, 0.058 mmol) was added. The resulting solution was stirred for 30 min, then the solvent was removed, and the residue was purified by flash chromatography on silica (CHCl<sub>3</sub>/MeOH/H<sub>2</sub>O, 15:9:1, TLC: R<sub>f</sub> = 0.32) to give HOHA-PAF (**4a**, 23.8 mg, 77%). <sup>1</sup>H NMR (CDCl<sub>3</sub>/CD<sub>3</sub>OD = 1/1, 400 MHz): δ 9.53(d, J = 8.0 Hz, 1H), 6.92(dd, J = 15.6 Hz, 4.4 Hz, 1H), 6.29(dd, J = 15.6 Hz, 8.1 Hz, 1H), 5.14(m, 1H), 4.39-4.47(1H), 4.21(bs, 2H), 3.90-4.06(2H), 3.54-3.60(4H), 3.35-3.48(2H), 3.19(9H), 2.39-2.61(2H), 1.93-2.05(1H), 1.72-1.88(1H), 1.51(t, J = 6.1 Hz, 2H), 1.19-1.30(26H), 0.85(t, J = 6.6 Hz, 3H). HRMS (FAB): m/z calcd for C<sub>31</sub>H<sub>61</sub>NO<sub>9</sub>P<sup>+</sup> (MH<sup>+</sup>) 622.4084, found 622.4088.

**1-O-Hexadecyl-2-(5-hydroxy-8-oxooct-6-enoyl)-sn-glycero-3-phosphatidylcholine (HOOA-PAF, 4b).** A procedure analogous to that described above for **4a** was used to convert **10b** into (CHCl<sub>3</sub>/MeOH/H<sub>2</sub>O, 16:9:1, TLC: R<sub>f</sub> = 0.18) to give HOOA-PAF (**4b**, 80%). <sup>1</sup>H NMR (CDCl<sub>3</sub>/CD<sub>3</sub>OD = 1/1, 400 MHz): δ 9.52(d, J = 8.0 Hz, 1H), 6.92(ddd, J = 15.5 Hz, 4.4 Hz, 1.2 Hz, 1H), 6.28(ddd, J = 15.5 Hz, 8.0 Hz, 1.4 Hz, 1H), 5.14(m, 1H), 4.33-4.39(1H), 4.20(bs, 2H), 3.88-4.05(2H), 3.53-3.60(4H), 3.33-3.48(2H), 3.18(9H), 2.31-2.45(2H), 1.55-1.83(4H), 1.46-1.55(2H), 1.19-1.30(26H), 0.85(t, J = 6.7 Hz, 3H). HRMS (FAB): m/z calcd for C<sub>32</sub>H<sub>63</sub>NO<sub>9</sub>P<sup>+</sup> (MH<sup>+</sup>) 636.4240, found 636.4236.

**1-O-Hexadecyl-2-(9-hydroxy-12-oxododec-10-enoyl)-sn-glycero-3-phosphatidylcholine (HODA-PAF, 4c).** A procedure analogous to that described above for **4a** was used to convert **10c** into HODA-PAF (**4c**, 86%) TLC:  $R_f = 0.26$  ( $\text{CHCl}_3/\text{MeOH}/\text{H}_2\text{O}$ , 15:9:1).  $^1\text{H}$  NMR ( $\text{CDCl}_3/\text{CD}_3\text{OD} = 1/1$ , 400 MHz):  $\delta$  9.52(d,  $J = 8.0$  Hz, 1H), 6.91(dd,  $J = 15.6$  Hz, 4.6 Hz, 1H), 6.26(ddd,  $J = 15.6$  Hz, 8.0 Hz, 1.3 Hz, 1H), 5.12(m, 1H), 4.30-4.37(1H), 4.21(bs, 2H), 3.88-4.02(2H), 3.53-3.62(4H), 3.35-3.49(2H), 3.18(9H), 2.31(t,  $J = 7.5$  Hz, 2H), 1.44-1.71(6H), 1.12-1.44(34H), 0.85(t,  $J = 6.6$  Hz, 3H). HRMS (FAB):  $m/z$  calcd for  $\text{C}_{36}\text{H}_{71}\text{NO}_9\text{P}^+$  ( $\text{MH}^+$ ) 692.4866, found 692.4829.

**1-O-Hexadecyl-2-(4-hydroxy-7-carboxyhept-5-enoyl)-sn-glycero-3-phosphatidylcholine (HHdiA-PAF, 5a).** A procedure analogous to that described above for **7a** was used to convert **4a** into HHdiA-PAF (**5a**, 60%) TLC:  $R_f = 0.09$  ( $\text{CHCl}_3/\text{MeOH}/\text{H}_2\text{O}$ , 15:9:1).  $^1\text{H}$  NMR ( $\text{CDCl}_3/\text{CD}_3\text{OD} = 1/1$ , 400 MHz):  $\delta$  6.75(ddd,  $J = 15.7$  Hz, 5.1 Hz, 2.2 Hz, 1H), 5.98(dd,  $J = 15.6$  Hz, 1.6 Hz, 1H), 5.13(m, 1H), 4.24-4.31(1H), 4.21(bs, 2H), 3.90-4.05(2H), 3.53-3.61(4H), 3.35-3.48(2H), 3.18(9H), 2.36-2.53(2H), 1.85-1.96(1H), 1.72-1.85(1H), 1.51(t,  $J = 7.0$  Hz, 2H), 1.21-1.28(26H), 0.85(t,  $J = 6.8$  Hz, 3H). HRMS (FAB):  $m/z$  calcd for  $\text{C}_{31}\text{H}_{61}\text{NO}_{10}\text{P}^+$  ( $\text{MH}^+$ ) 638.4033, found 638.4003.

**1-O-Hexadecyl-2-(5-hydroxy-8-carboxyoct-6-enoyl)-sn-glycero-3-phosphatidylcholine (HOdiA-PAF, 5b).** A procedure analogous to that described above for **7a** was used to convert **4b** into HOdiA-PAF (**5b**, 65%) TLC:  $R_f = 0.22$  ( $\text{CHCl}_3/\text{MeOH}/\text{H}_2\text{O}$ , 12:9:1.5).  $^1\text{H}$  NMR ( $\text{CDCl}_3/\text{CD}_3\text{OD} = 1/1$ , 400 MHz):  $\delta$  6.51(ddd,  $J = 15.7$  Hz, 5.9 Hz, 1.0 Hz, 1H), 5.94(dd,  $J = 15.5$  Hz, 1.2 Hz, 1H), 5.14(m, 1H), 4.09-4.27(3H),

3.88-4.05(2H), 3.52-3.63(4H), 3.35-3.48(2H), 3.18(9H), 2.32-2.41(2H), 1.60-1.77(2H), 1.44-1.60(4H), 1.19-1.29(26H), 0.85(t, J = 7.0 Hz, 3H).

HRMS (FAB): m/z calcd for  $C_{32}H_{62}NO_{10}P^+$  ( $MH^+$ ) 652.4190, found 652.4172.

**1-O-Hexadecyl-2-(9-hydroxy-12-carboxydodec-10-enoyl)-sn-glycero-3-phosphatidylcholine (HDdiA-PAF, 5c).** A procedure analogous to that described above for **7a** was used to convert **4c** into HDdiA-PAF (**5c**, 61%) TLC:  $R_f = 0.13$  ( $CHCl_3/MeOH/H_2O$ , 15:9:1).  $^1H$  NMR ( $CDCl_3/CD_3OD = 1/1$ , 400 MHz):  $\delta$  6.77(dd, J = 15.6 Hz, 5.4 Hz, 1H), 5.93(dd, J = 15.7 Hz, 1.4 Hz, 1H), 5.10(m, 1H), 4.12-4.25(3H), 3.87-4.01(2H), 3.50-3.61(4H), 3.34-3.48(2H), 3.17(9H), 2.30(t, J = 7.4 Hz, 2H), 1.57(t, J = 7.5 Hz, 2H), 1.46-1.54(4H), 1.18-1.33(34H), 0.84(t, J = 6.8 Hz, 3H). HRMS (FAB): m/z calcd for  $C_{36}H_{71}NO_{10}P^+$  ( $MH^+$ ) 708.4816, found 708.4792.

**1-O-Hexadecyl-2-tridecanoyl-sn-glycero-3-phosphatidylcholine (C<sub>13</sub>-PAF).** 1-O-Hexadecyl-2-lyso-*sn*-glycero-3-phosphatidylcholine (16 mg, 0.03 mmol), which was dried on a vacuum pump equipped with a dry ice-acetone trap overnight at room temperature, was dissolved in freshly distilled  $CHCl_3$  (2 mL). Tridecanoic acid (72 mg, 0.33 mmol), DCC (40 mg, 0.19 mmol) and DMAP (4.0 mg, 0.033 mmol) were added. The mixture was stirred at room temperature for 96 h under argon. The solvent was then removed by rotary evaporation and the residue was purified by flash chromatography on silica with  $CHCl_3/MeOH/H_2O$  (16/9/1, TLC:  $R_f = 0.26$ ) to give C<sub>13</sub>-PAF (13 mg, 58%).  $^1H$  NMR ( $CDCl_3/CD_3OD = 1/1$ , 400 MHz):  $\delta$  5.12(m, 1H), 4.17-4.24(2H), 3.89-4.01(2H), 3.55-3.69(4H), 3.33-3.49(2H), 3.18(9H), 2.28-2.34(2H), 1.59(t, J = 7.11 Hz, 2H),

1.51(t, J = 7.11 Hz, 2H), 1.21-1.29(44H), 0.85(t, J = 6.70 Hz, 6H). HRMS (FAB): m/z calcd for C<sub>37</sub>H<sub>77</sub>NO<sub>7</sub>P<sup>+</sup> (MH<sup>+</sup>) 678.5438, found 678.5423.

**1-O-Hexadecyl-2-linoleoyl-*sn*-glycero-3-phosphatidylcholine (LA-PAF).** 1-O-Hexadecyl-2-lyso-*sn*-glycero-3-phosphatidylcholine (25 mg, 0.052 mmol), which was dried on a vacuum pump equipped with a dry ice-acetone trap overnight at room temperature, was dissolved in freshly distilled CHCl<sub>3</sub> (2 mL). Linoleic acid (145.6 mg, 0.52 mmol), DCC (62.4 mg, 0.30 mmol) and DMAP (6.24 mg, 0.051 mmol) were added. The mixture was stirred at room temperature for 96 h under argon. The solvent was then removed by rotary evaporation and the residue was purified by flash chromatography on silica with CHCl<sub>3</sub>/MeOH/H<sub>2</sub>O (16/9/1, TLC: R<sub>f</sub> = 0.29) to give LA-PAF (25.5 mg, 66%). H NMR (CDCl<sub>3</sub>/CD<sub>3</sub>OD = 1/1, 400 MHz): δ 5.23-5.38(4H), 5.12(m, 1H), 4.21(2H), 3.88-4.02(2H), 3.53-3.60(4H), 3.35-3.49(2H), 3.18(bs, 9H), 2.74(t, J = 6.18 Hz, 2H), 2.31(td, J = 7.4 Hz, 1.8 Hz, 2H), 1.98-2.07(4H), 1.59(t, J = 6.5 Hz, 1H), 1.51(t, J = 6.5 Hz, 1H), 1.20-1.37(40H), 0.79-0.90(6H). HRMS (FAB): m/z calcd for C<sub>42</sub>H<sub>83</sub>NO<sub>7</sub>P<sup>+</sup> (MH<sup>+</sup>) 744.5907, found 744.5907.

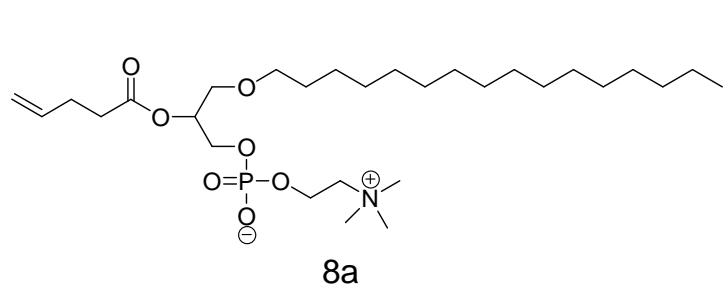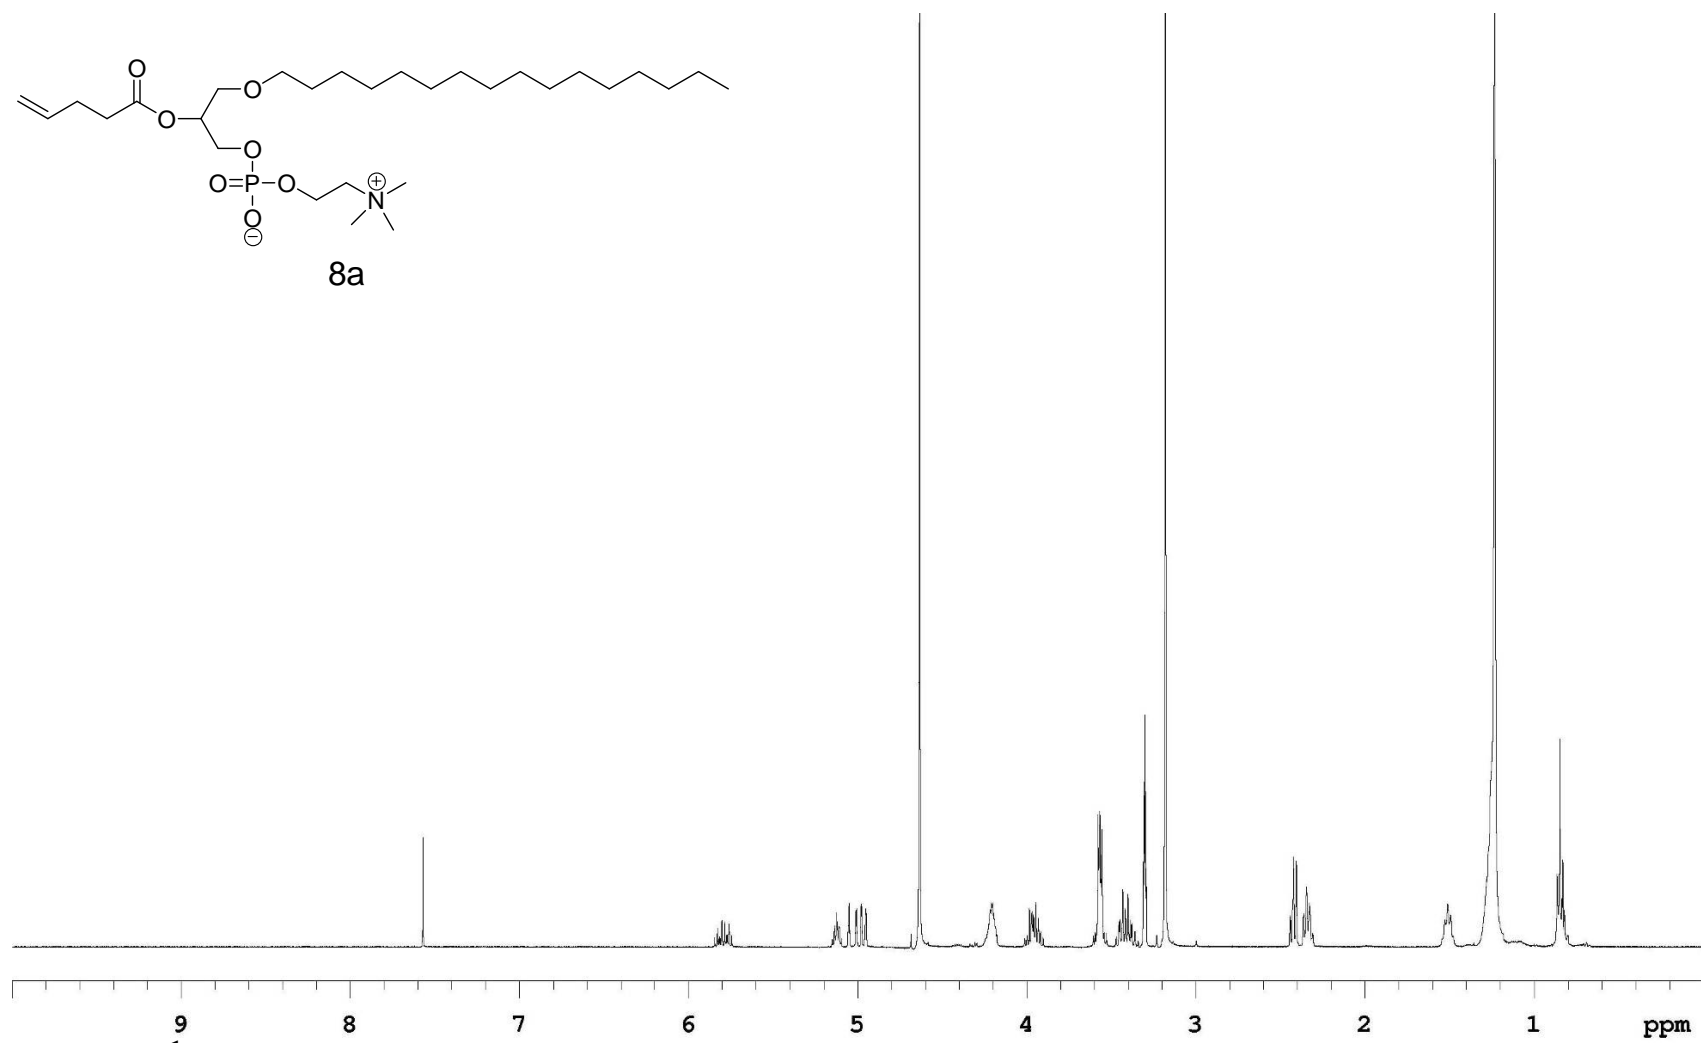

Figure S1.  $^1\text{H-NMR}$  (400 M,  $\text{CDCl}_3+\text{CD}_3\text{OD}$ ) of 1-O-Hexadecyl-2-(4-pentenoyl)-sn-glycero-3-phosphatidylcholine (8a).

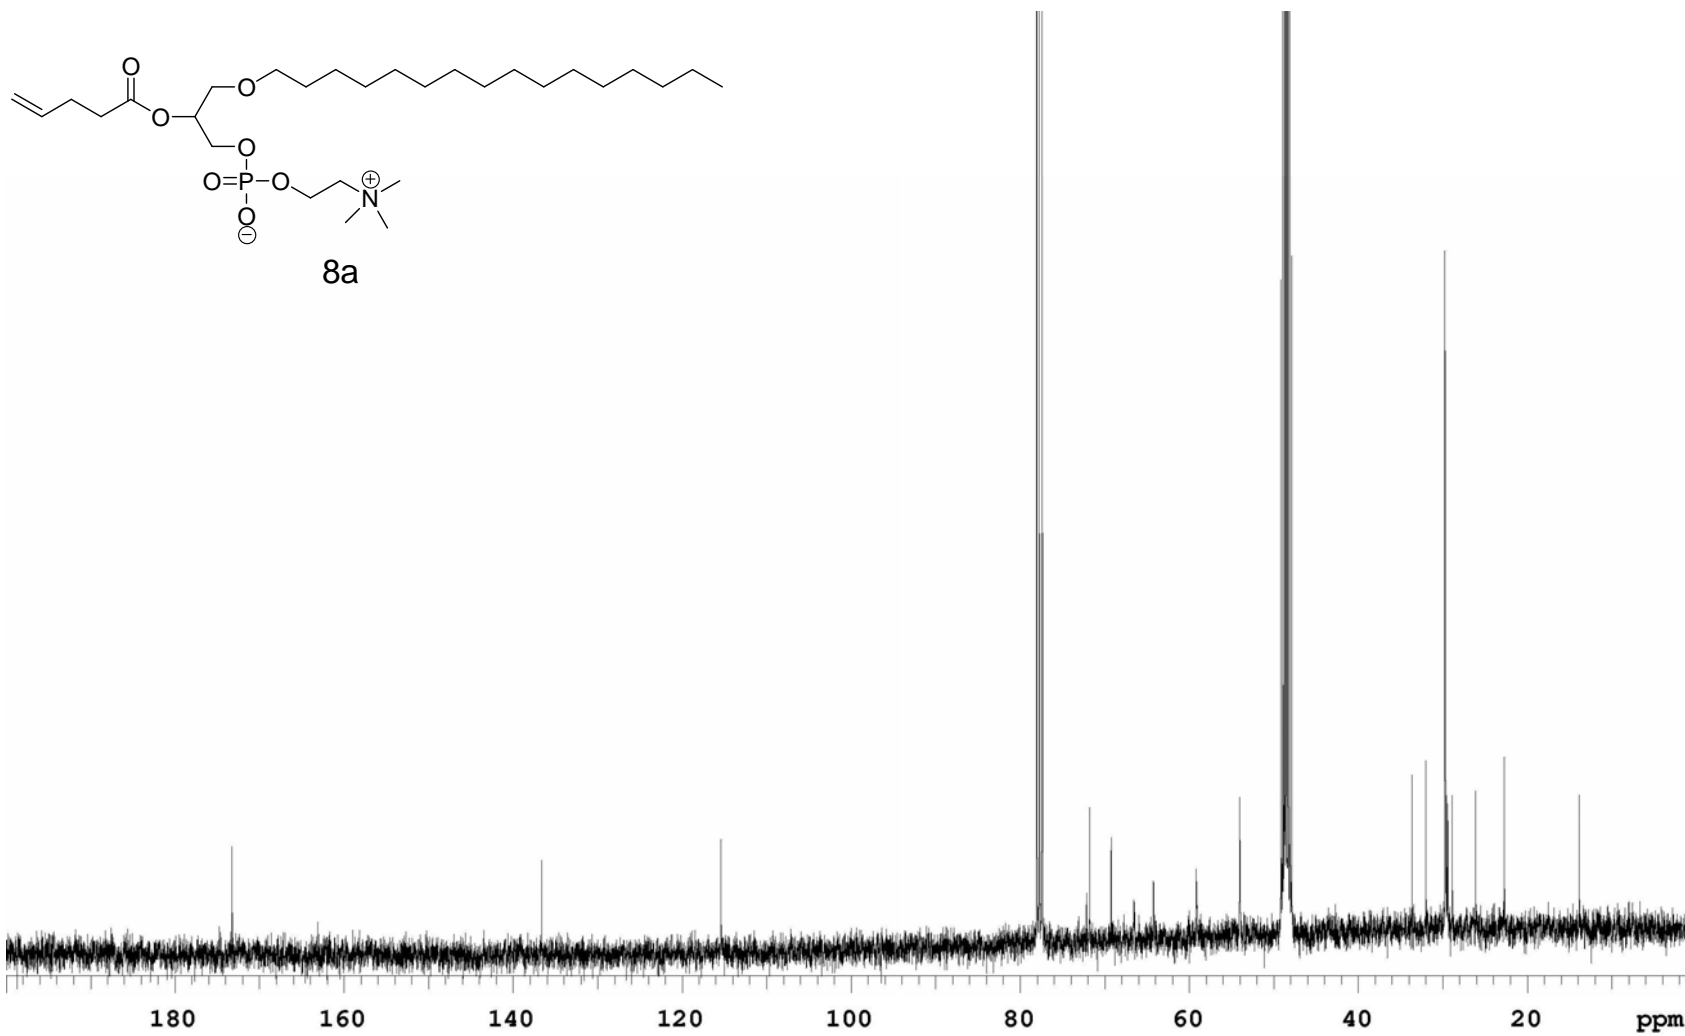

Figure S2. <sup>13</sup>C-NMR (100 M, CDCl<sub>3</sub>+CD<sub>3</sub>OD) of 1-O-Hexadecyl-2-(4-pentenoyl)-sn-glycero-3-phosphatidylcholine (8a).

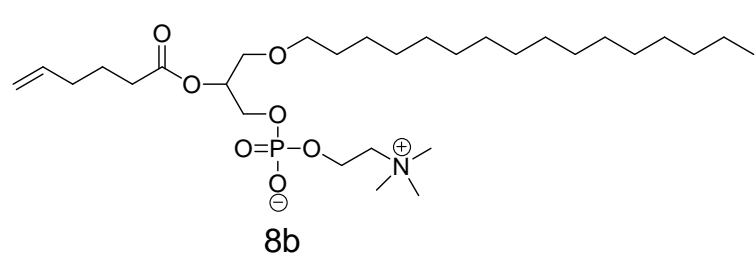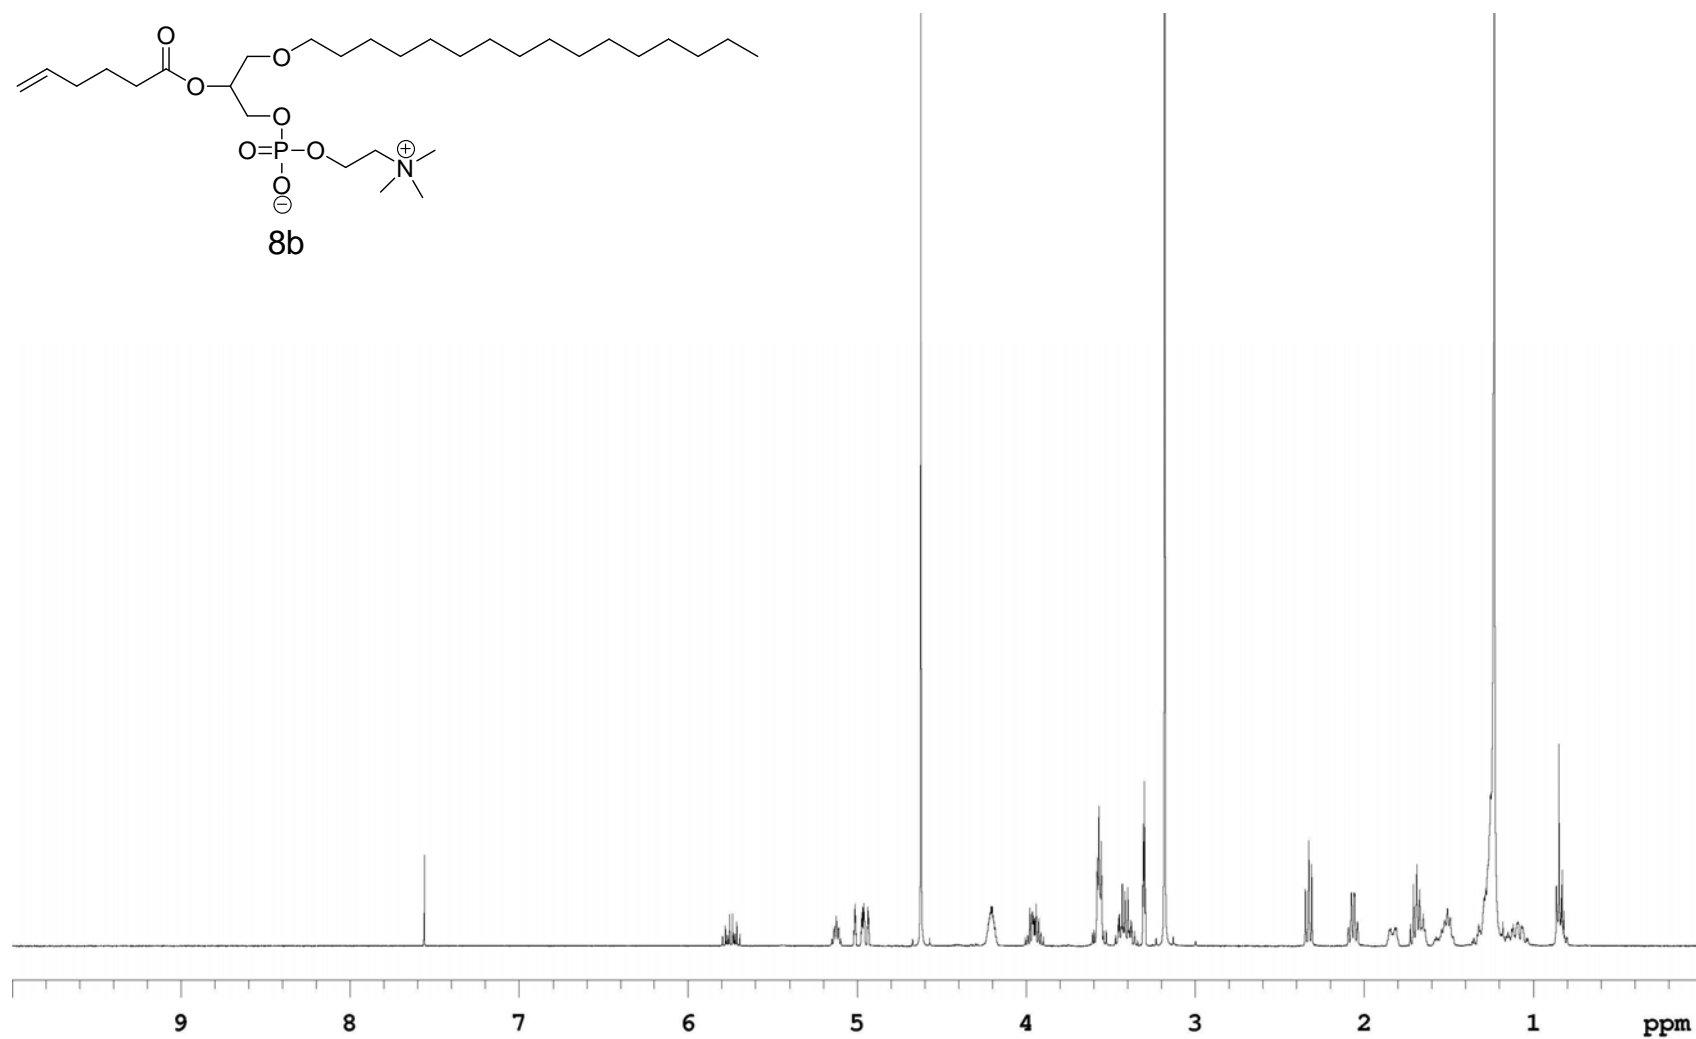

Figure S3.  $^1\text{H-NMR}$  (400 M,  $\text{CDCl}_3+\text{CD}_3\text{OD}$ ) of 1-O-Hexadecyl-2-(5-hexenoyl)-sn-glycero-3-phosphatidylcholine (8b).

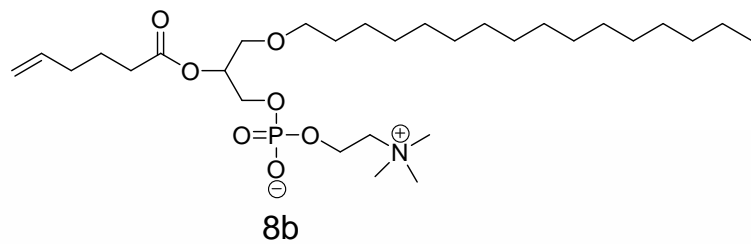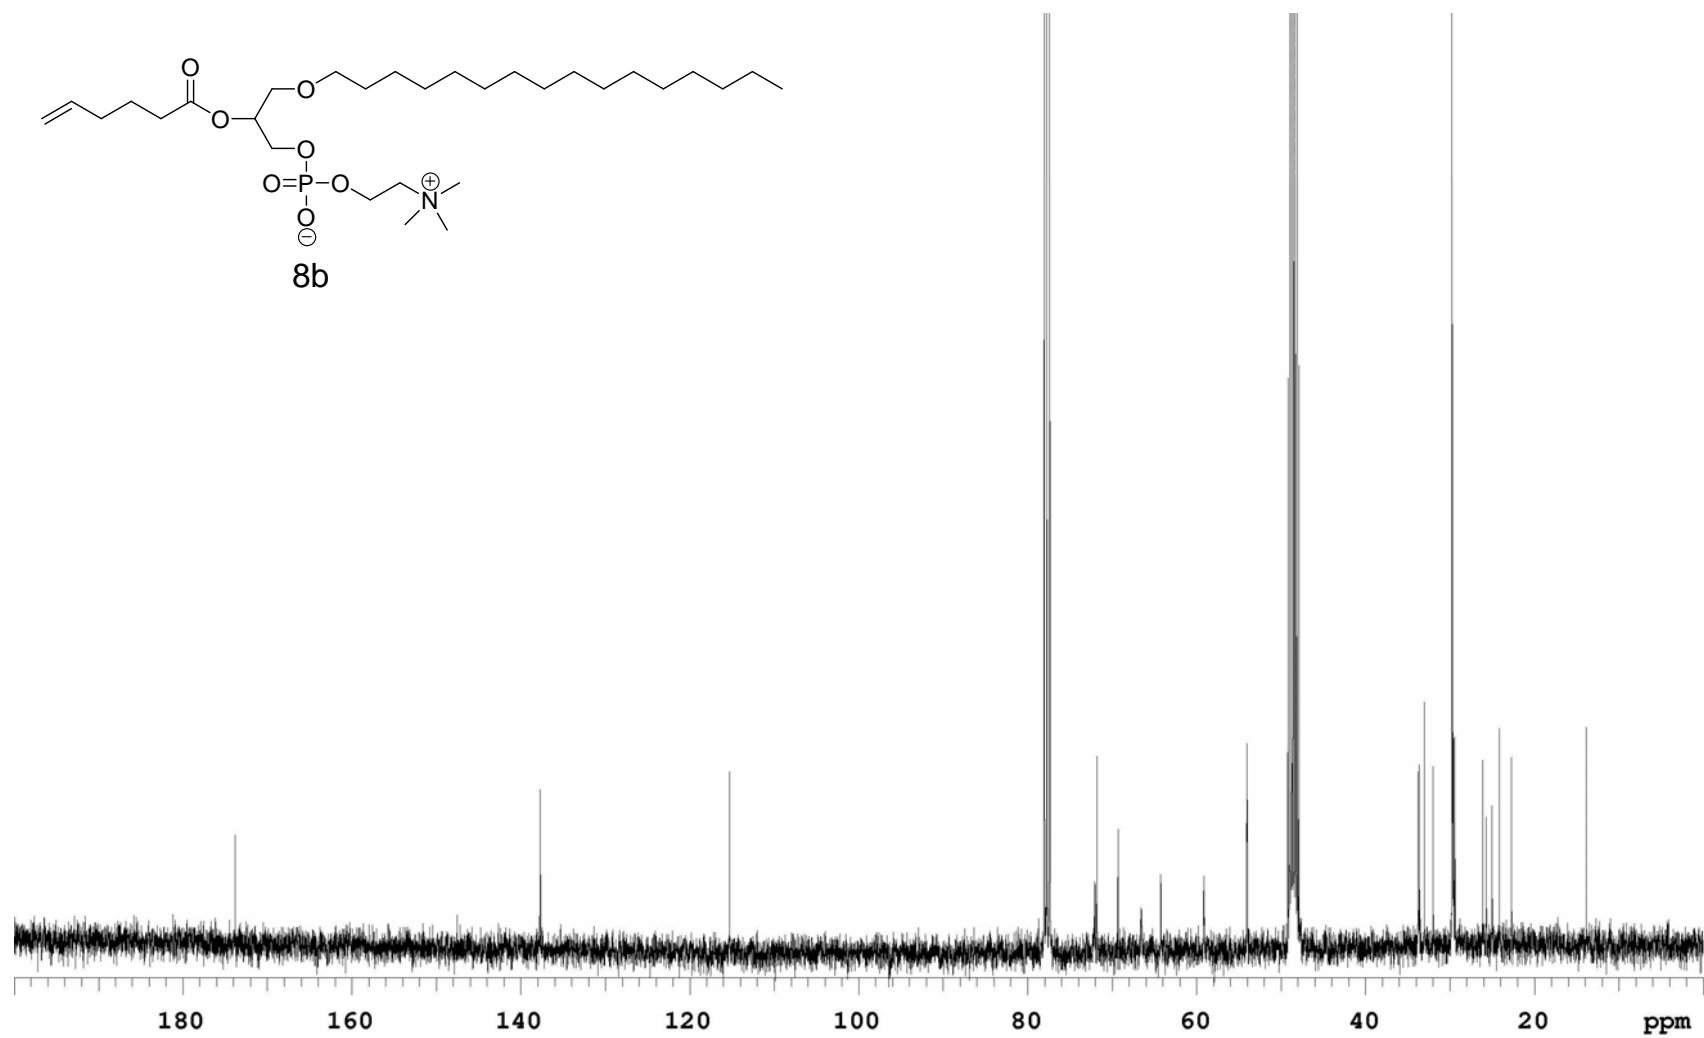

Figure S4. <sup>13</sup>C-NMR (100 M, CDCl<sub>3</sub>+CD<sub>3</sub>OD) of 1-O-Hexadecyl-2-(5-hexenoyl)-sn-glycero-3-phosphatidylcholine (8b).



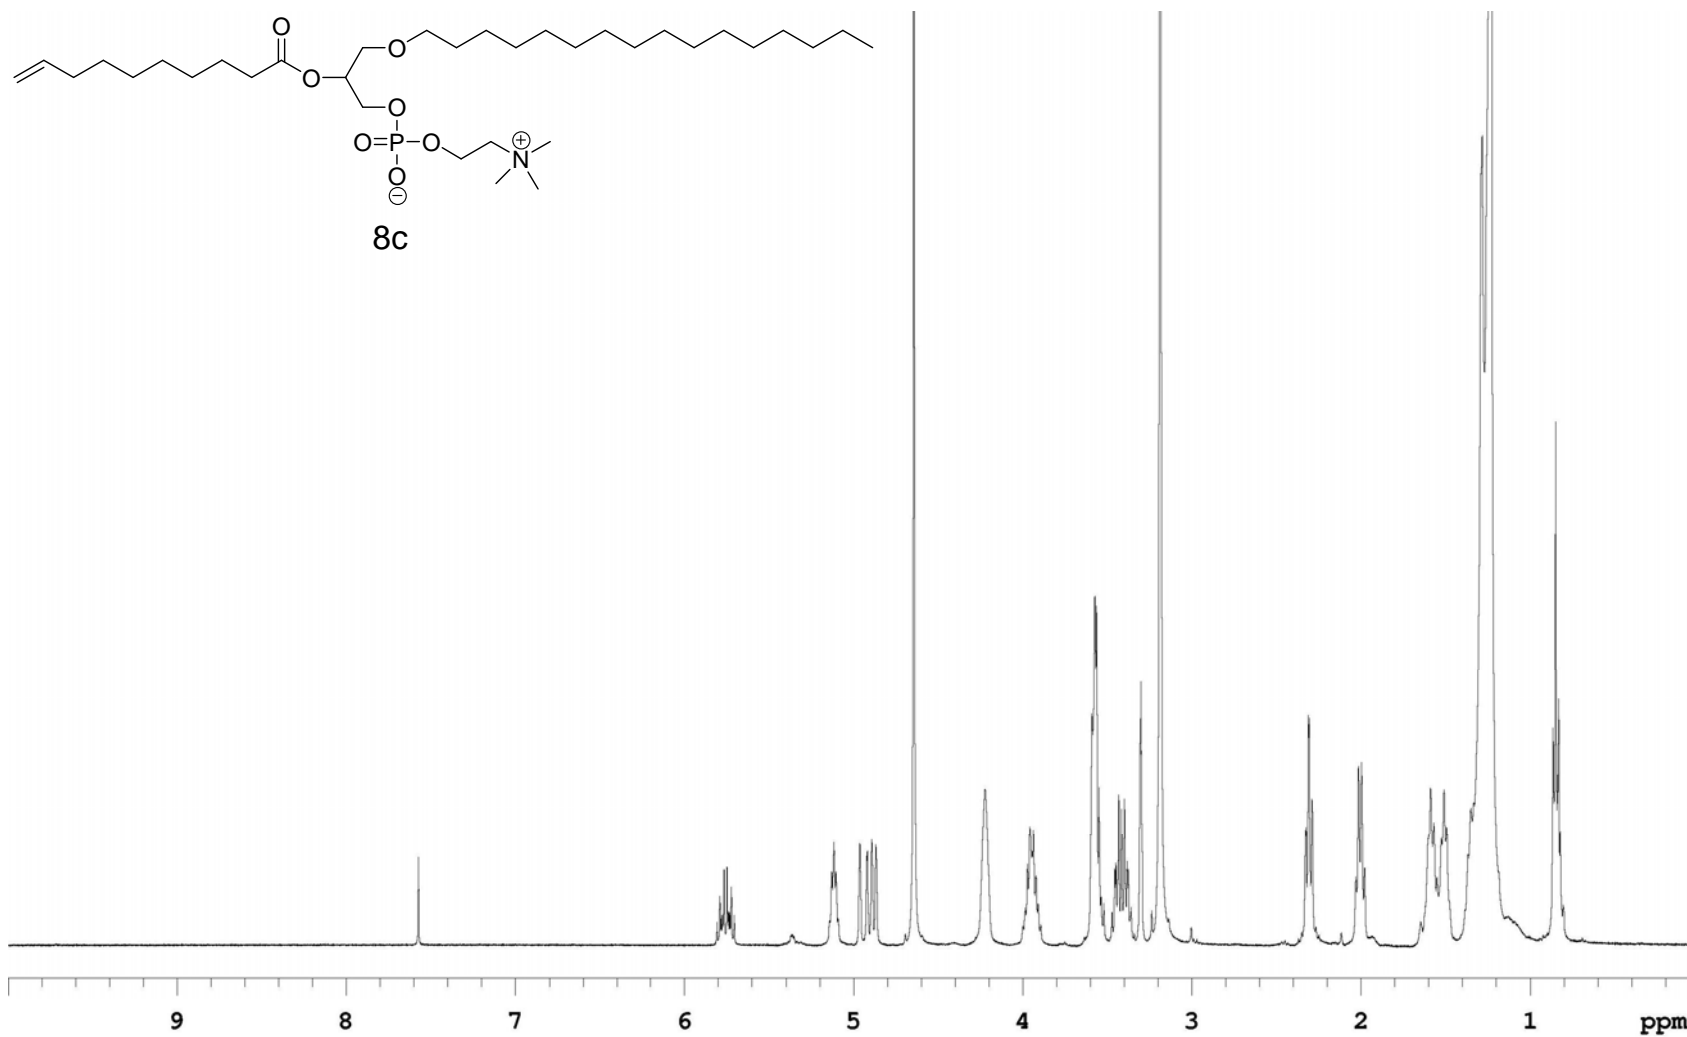

Figure S5. <sup>1</sup>H-NMR (400 M, CDCl<sub>3</sub>+CD<sub>3</sub>OD) of 1-O-Hexadecyl-2-(9-decenoyl)-sn-glycero-3-phosphatidylcholine (8c).

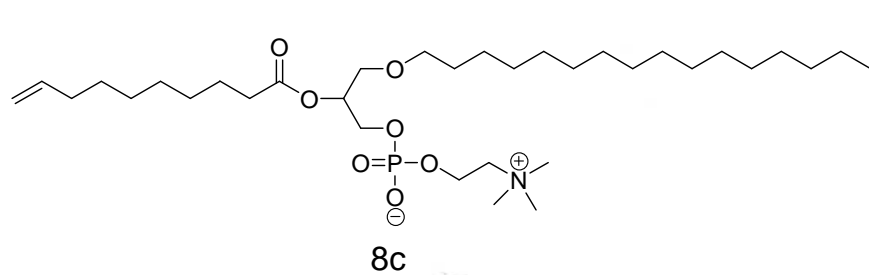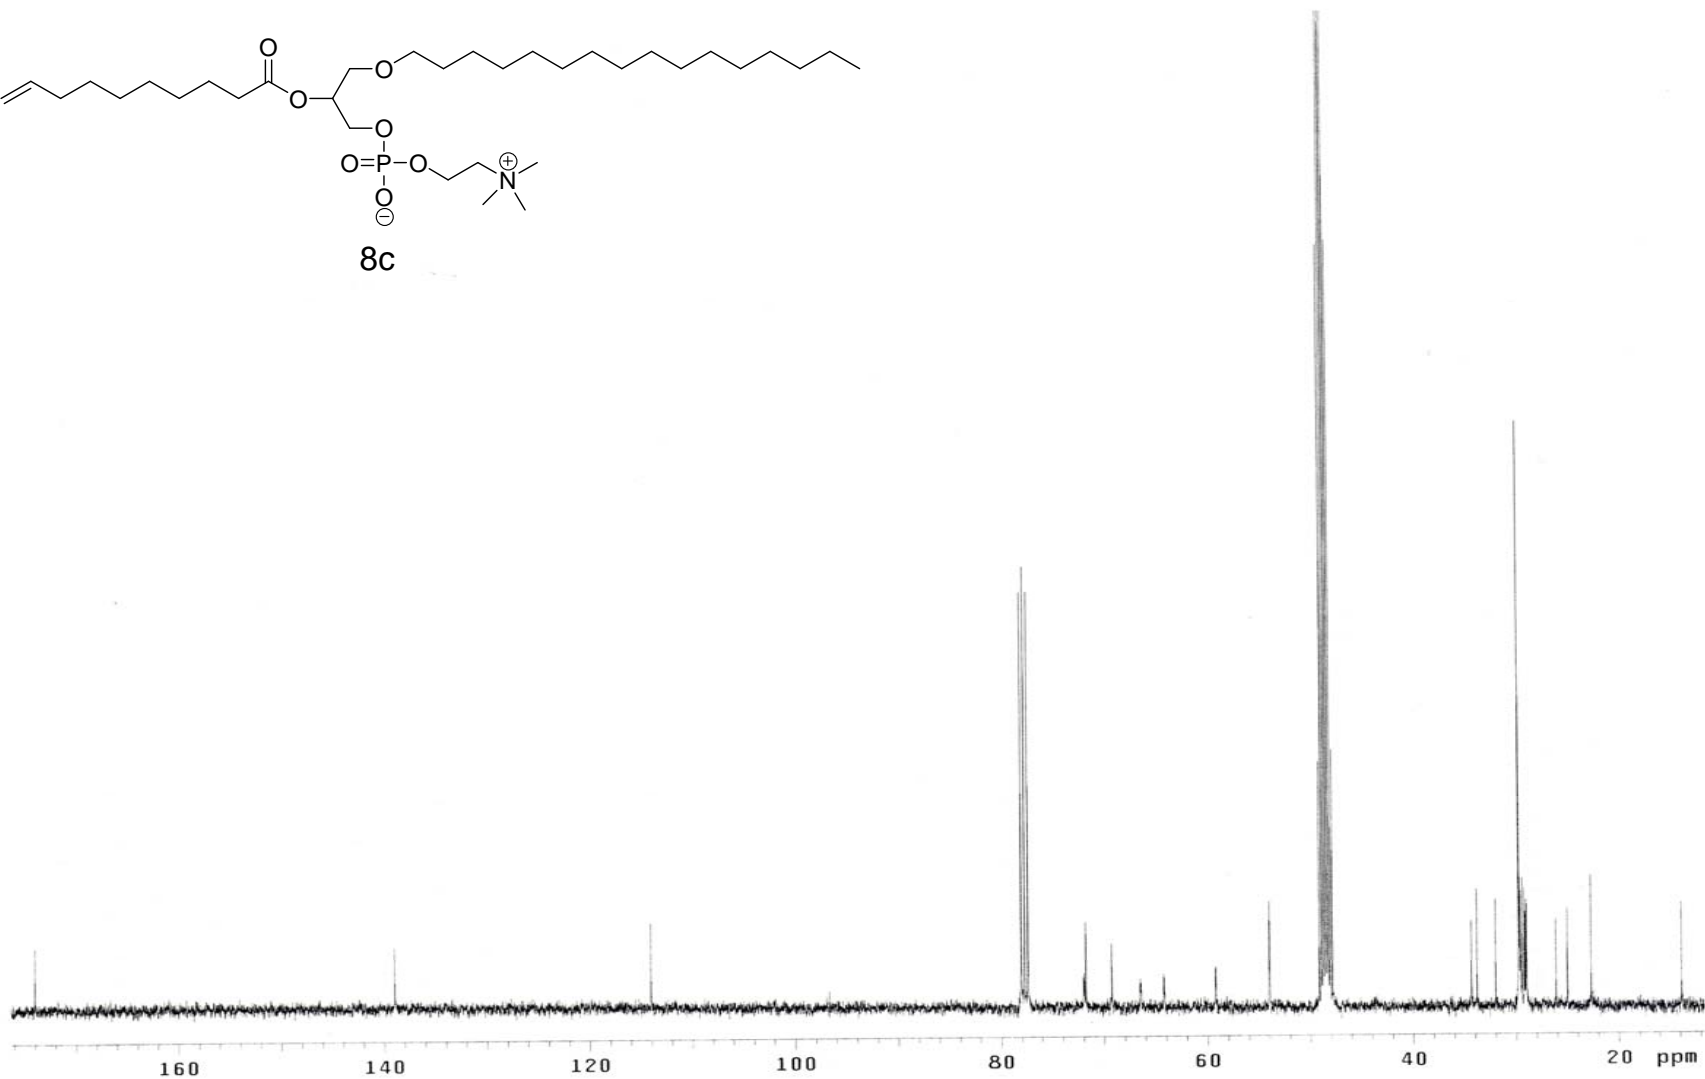

Figure S6.  $^{13}\text{C}$ -NMR (100 M,  $\text{CDCl}_3+\text{CD}_3\text{OD}$ ) of 1-O-Hexadecyl-2-(9-decenoyl)-sn-glycero-3-phosphatidylcholine (8c).

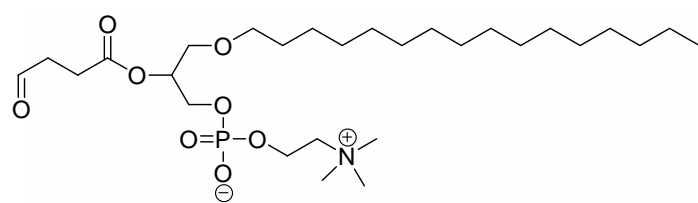

OB-PAF 2a

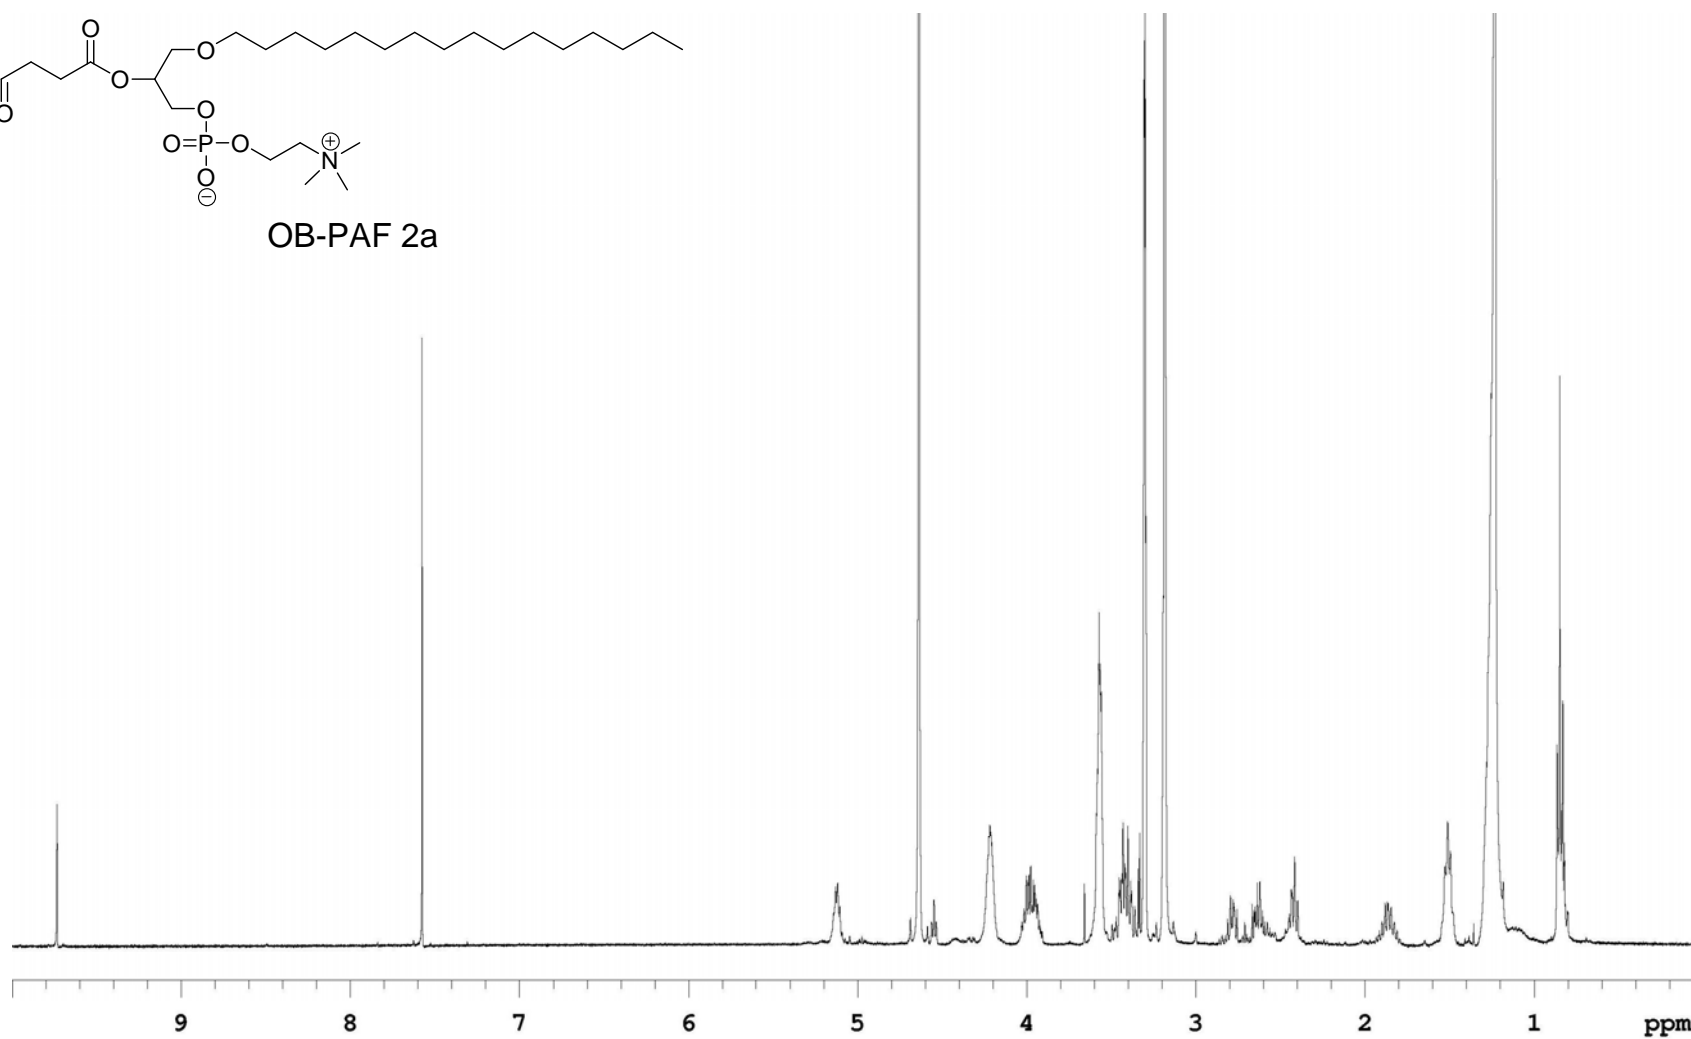

Figure S7. <sup>1</sup>H-NMR (400 M, CDCl<sub>3</sub>+CD<sub>3</sub>OD) of OB-PAF (2a).

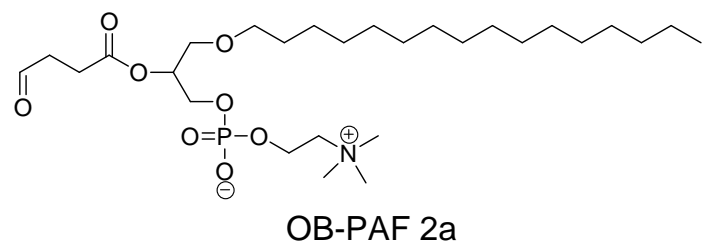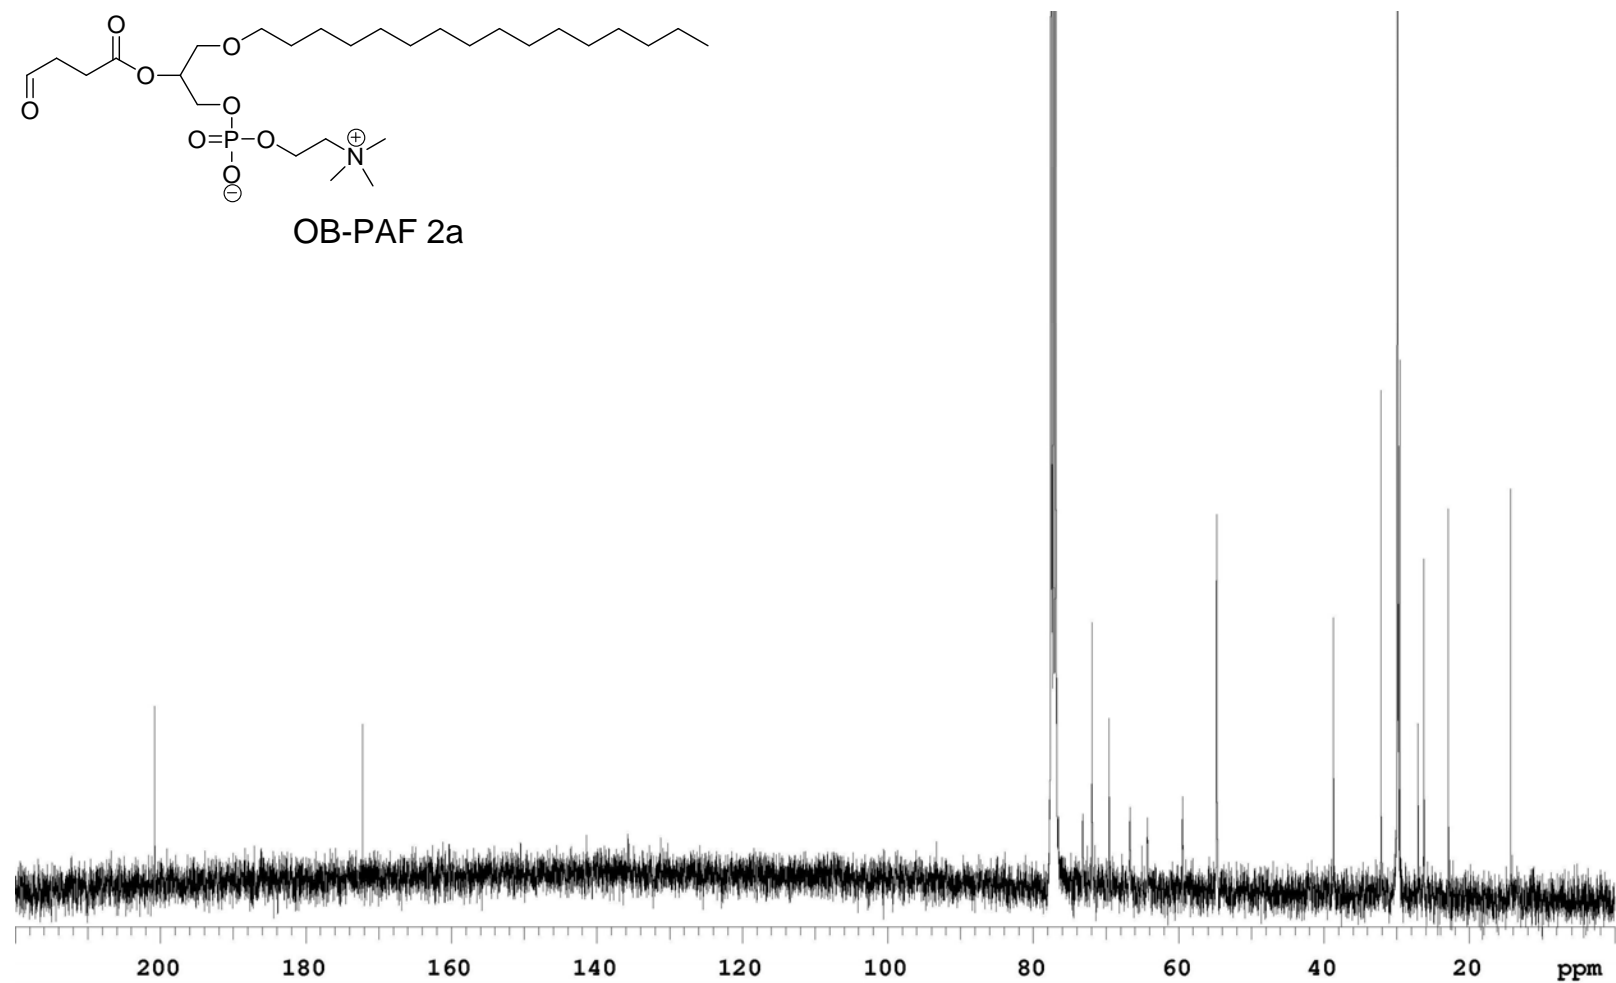

Figure S8.  $^{13}\text{C}$ -NMR (75 M,  $\text{CDCl}_3$ ) of OB-PAF (2a).



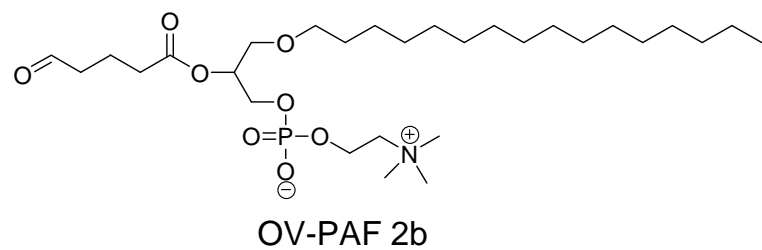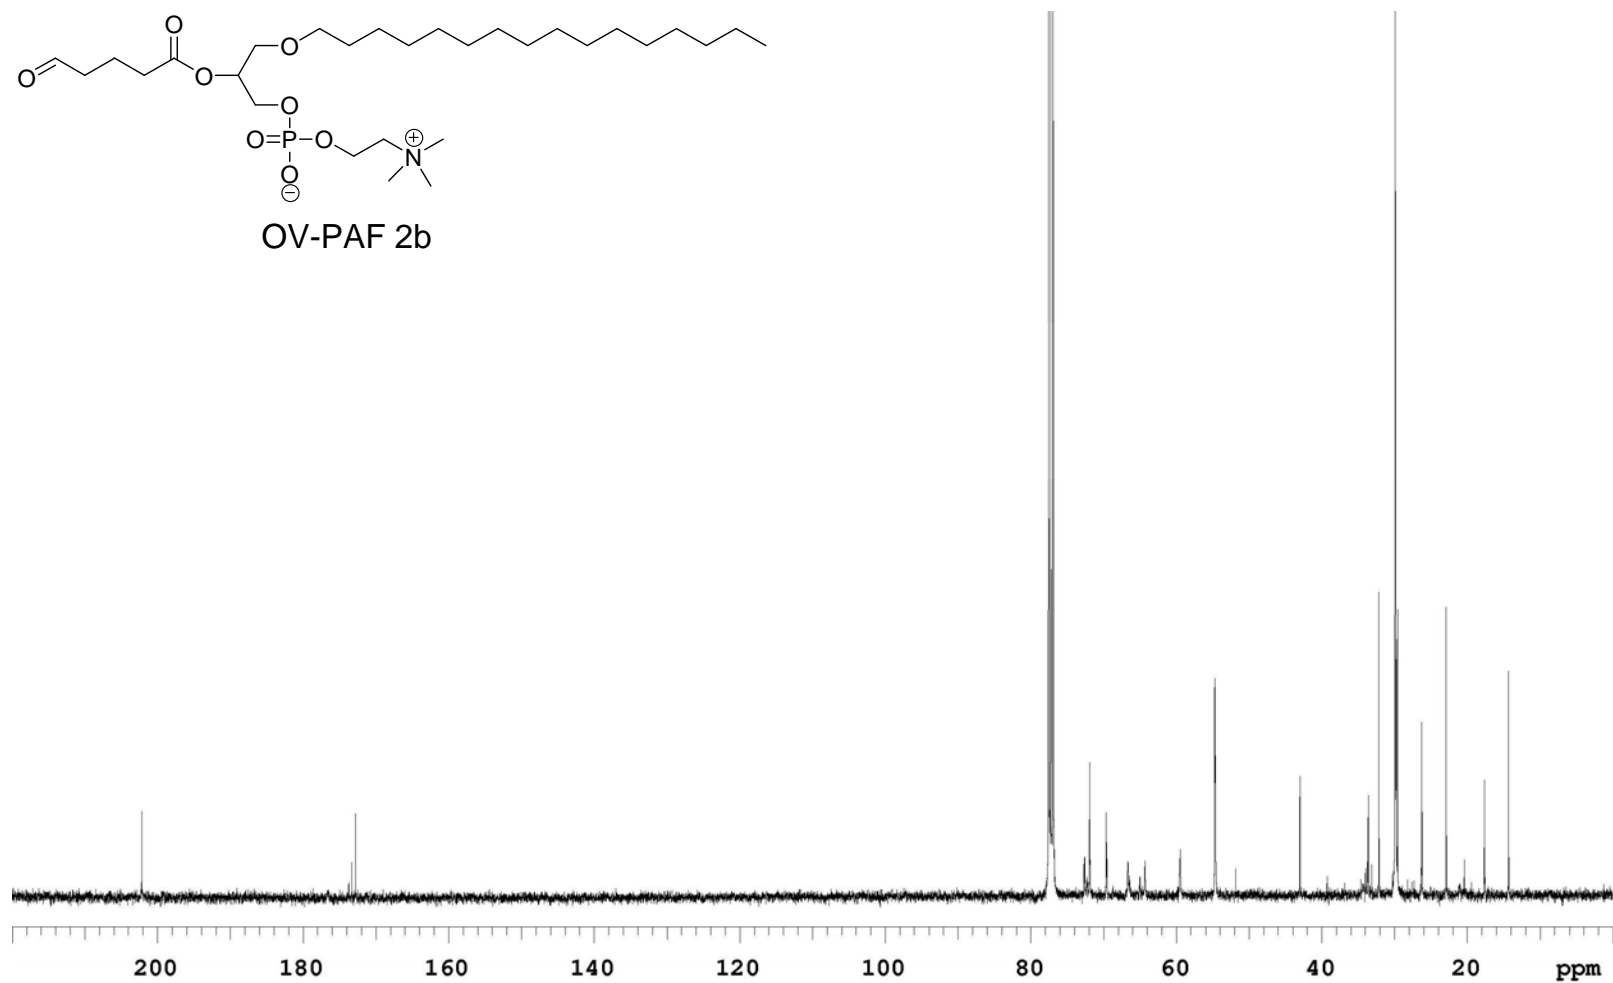

Figure S10. <sup>13</sup>C-NMR (75 M, CDCl<sub>3</sub>) of OV-PAF (2b).

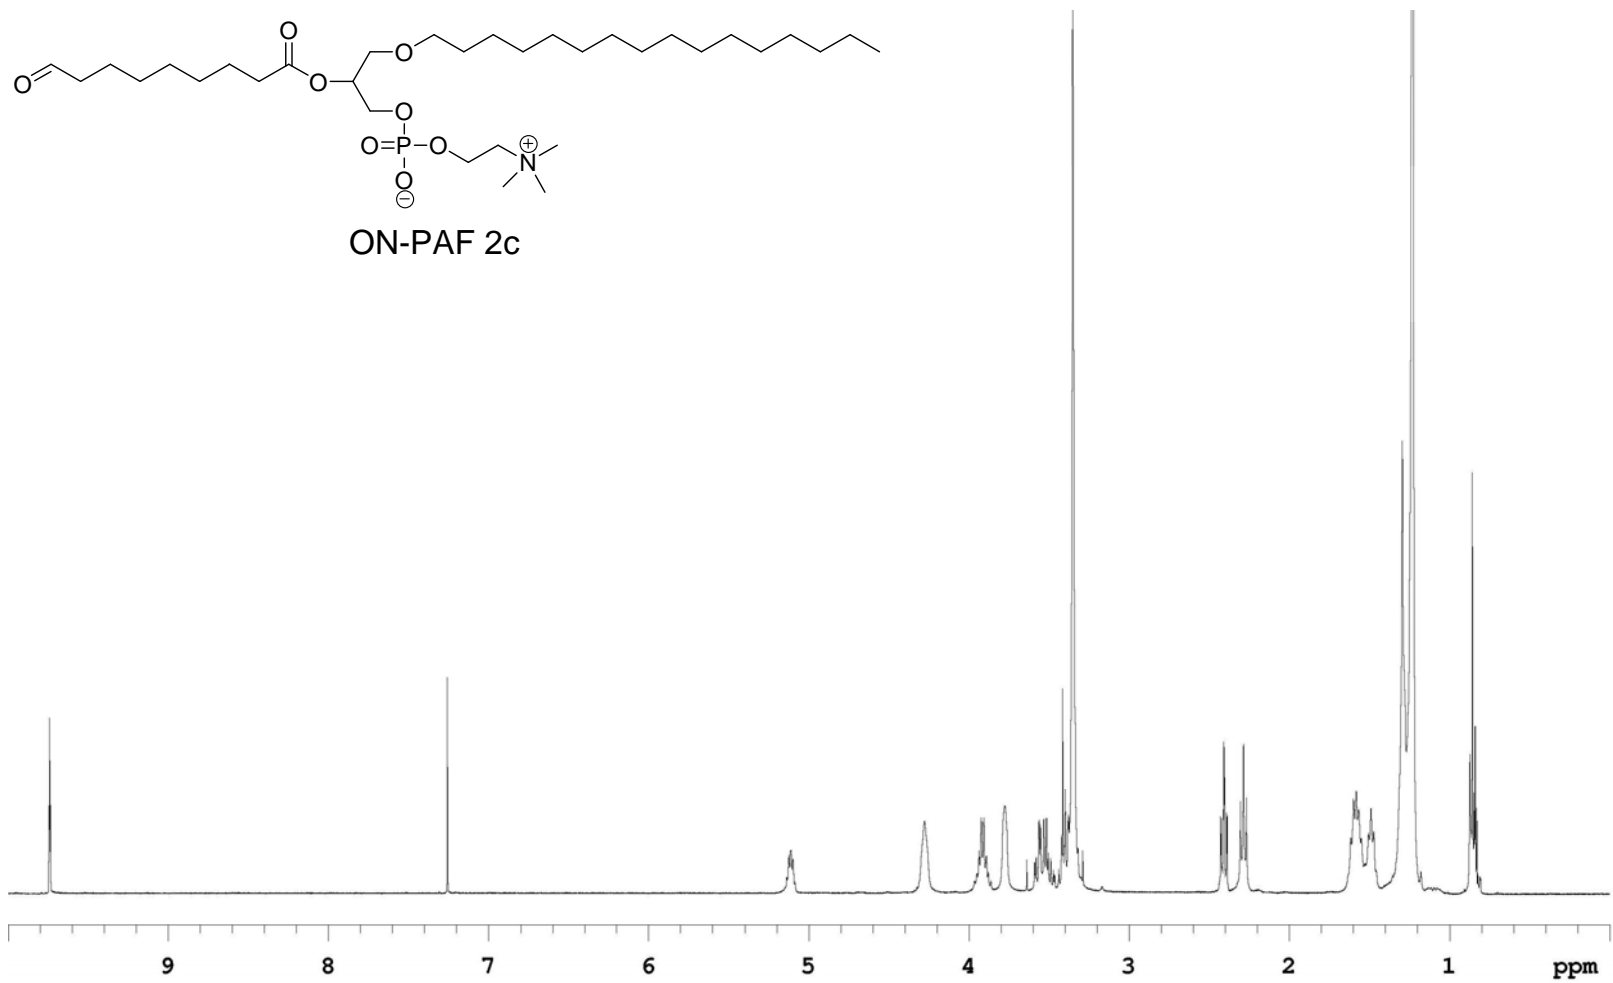

**Figure S11.** <sup>1</sup>H-NMR (400 M, CDCl<sub>3</sub>+CD<sub>3</sub>OD) of ON-PAF (2c).





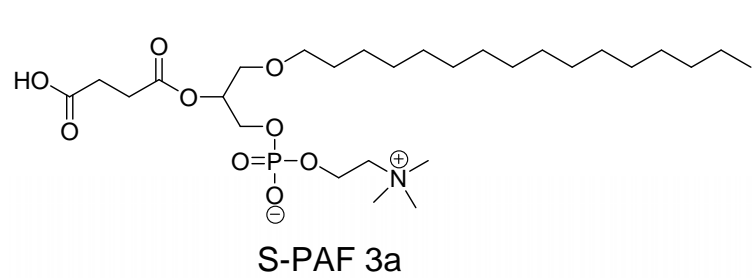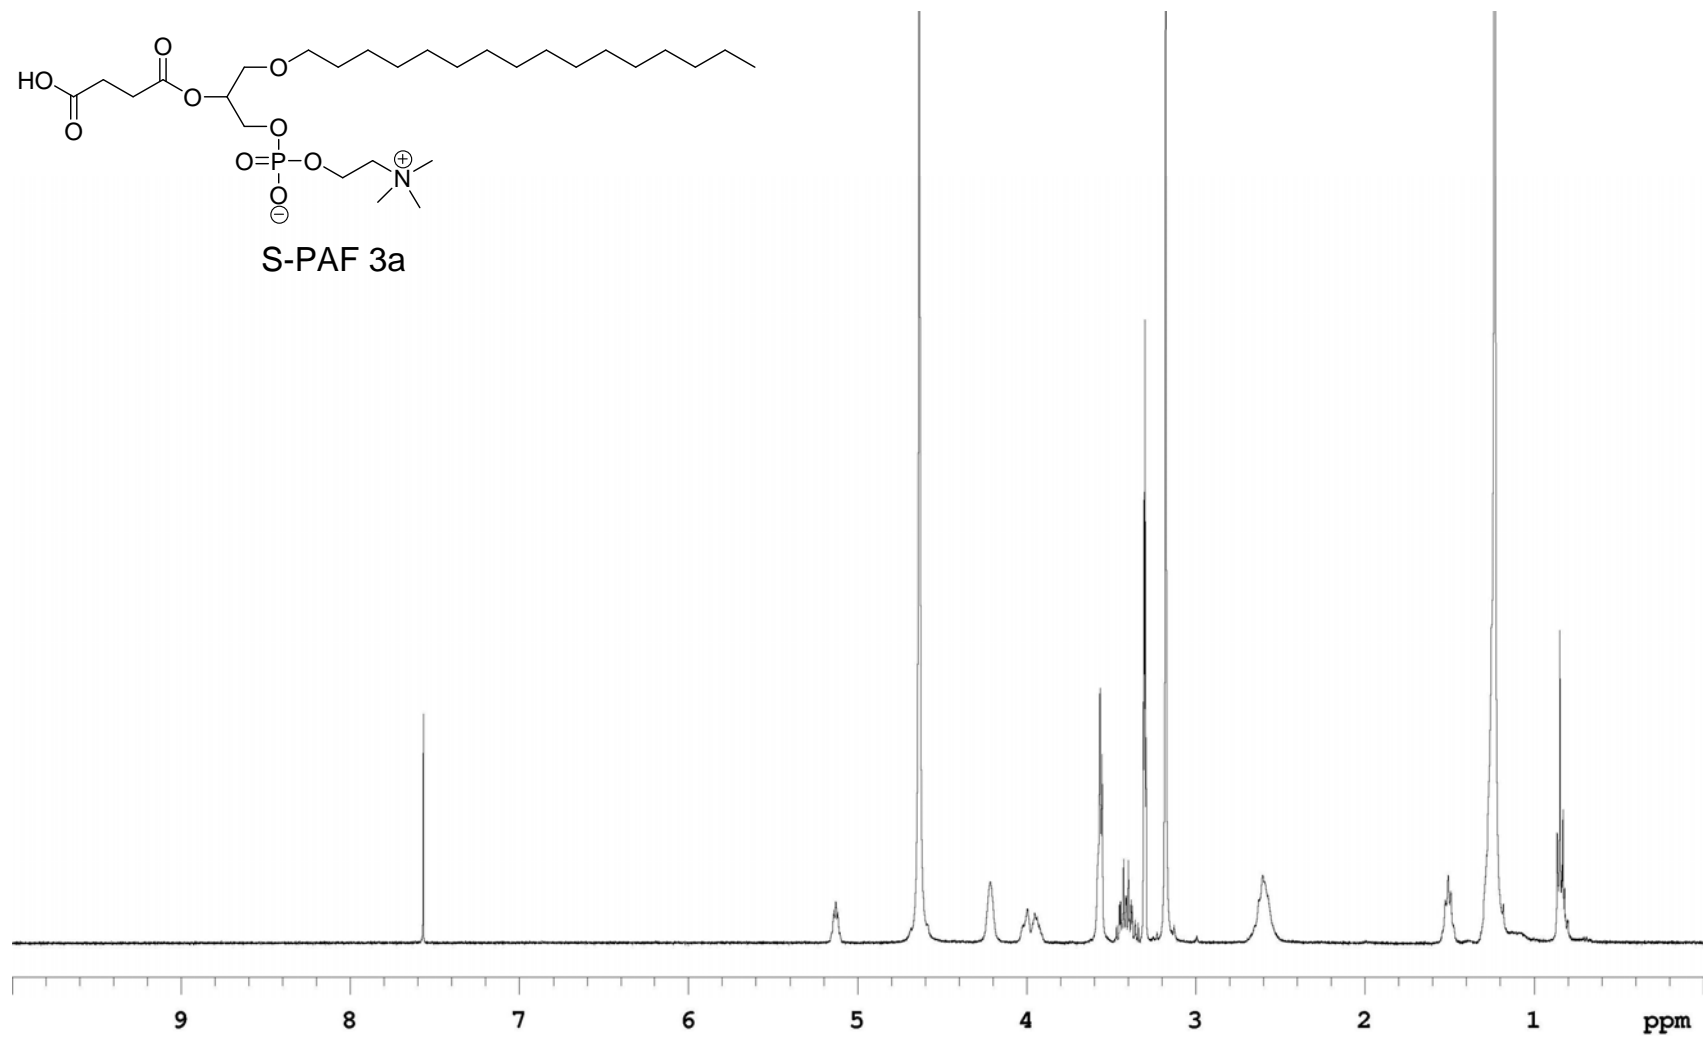

Figure S13. <sup>1</sup>H-NMR (400 M, CDCl<sub>3</sub>+CD<sub>3</sub>OD) of S-PAF (3a).

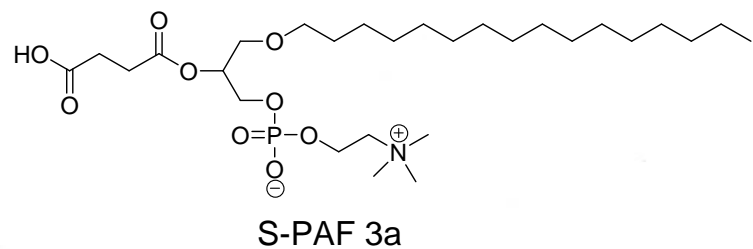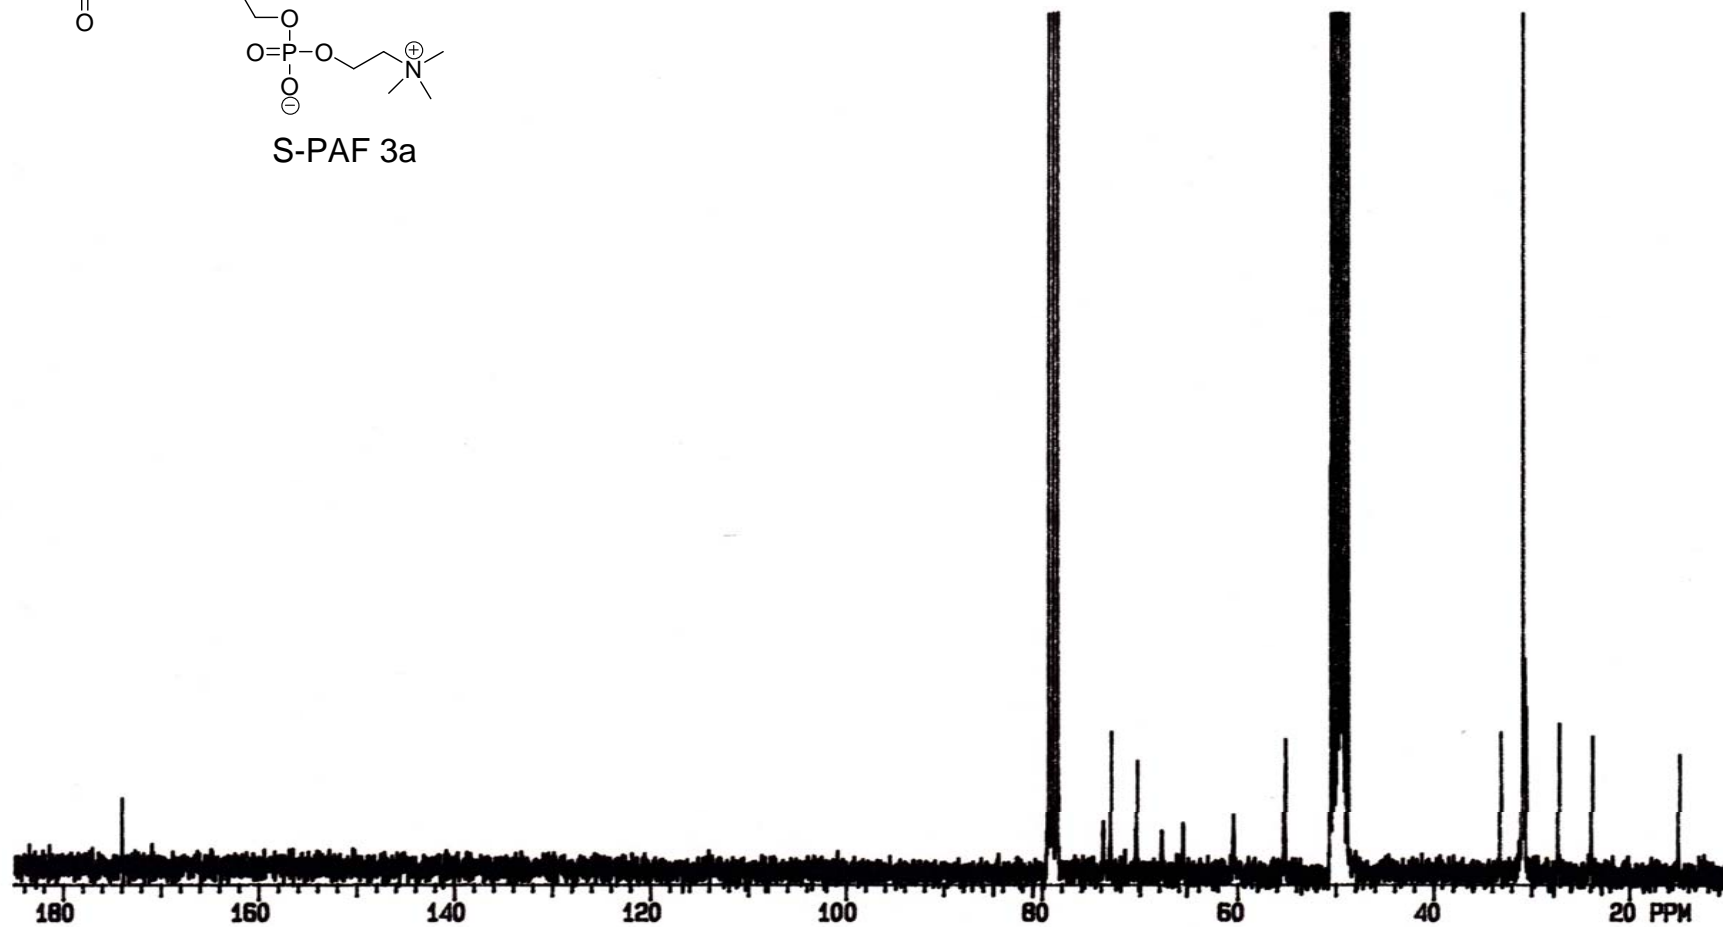

Figure S14. <sup>13</sup>C-NMR (75 M, CDCl<sub>3</sub>+CD<sub>3</sub>OD) of S-PAF (3a).

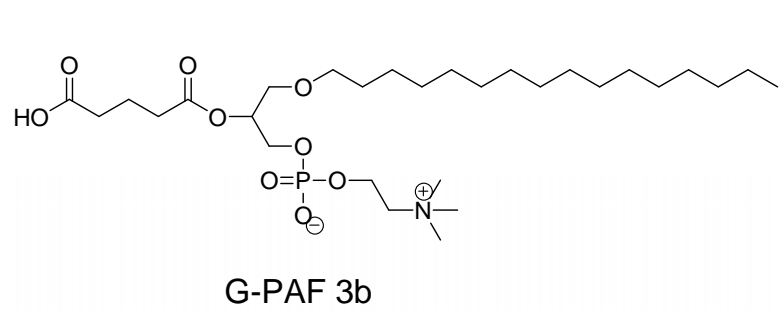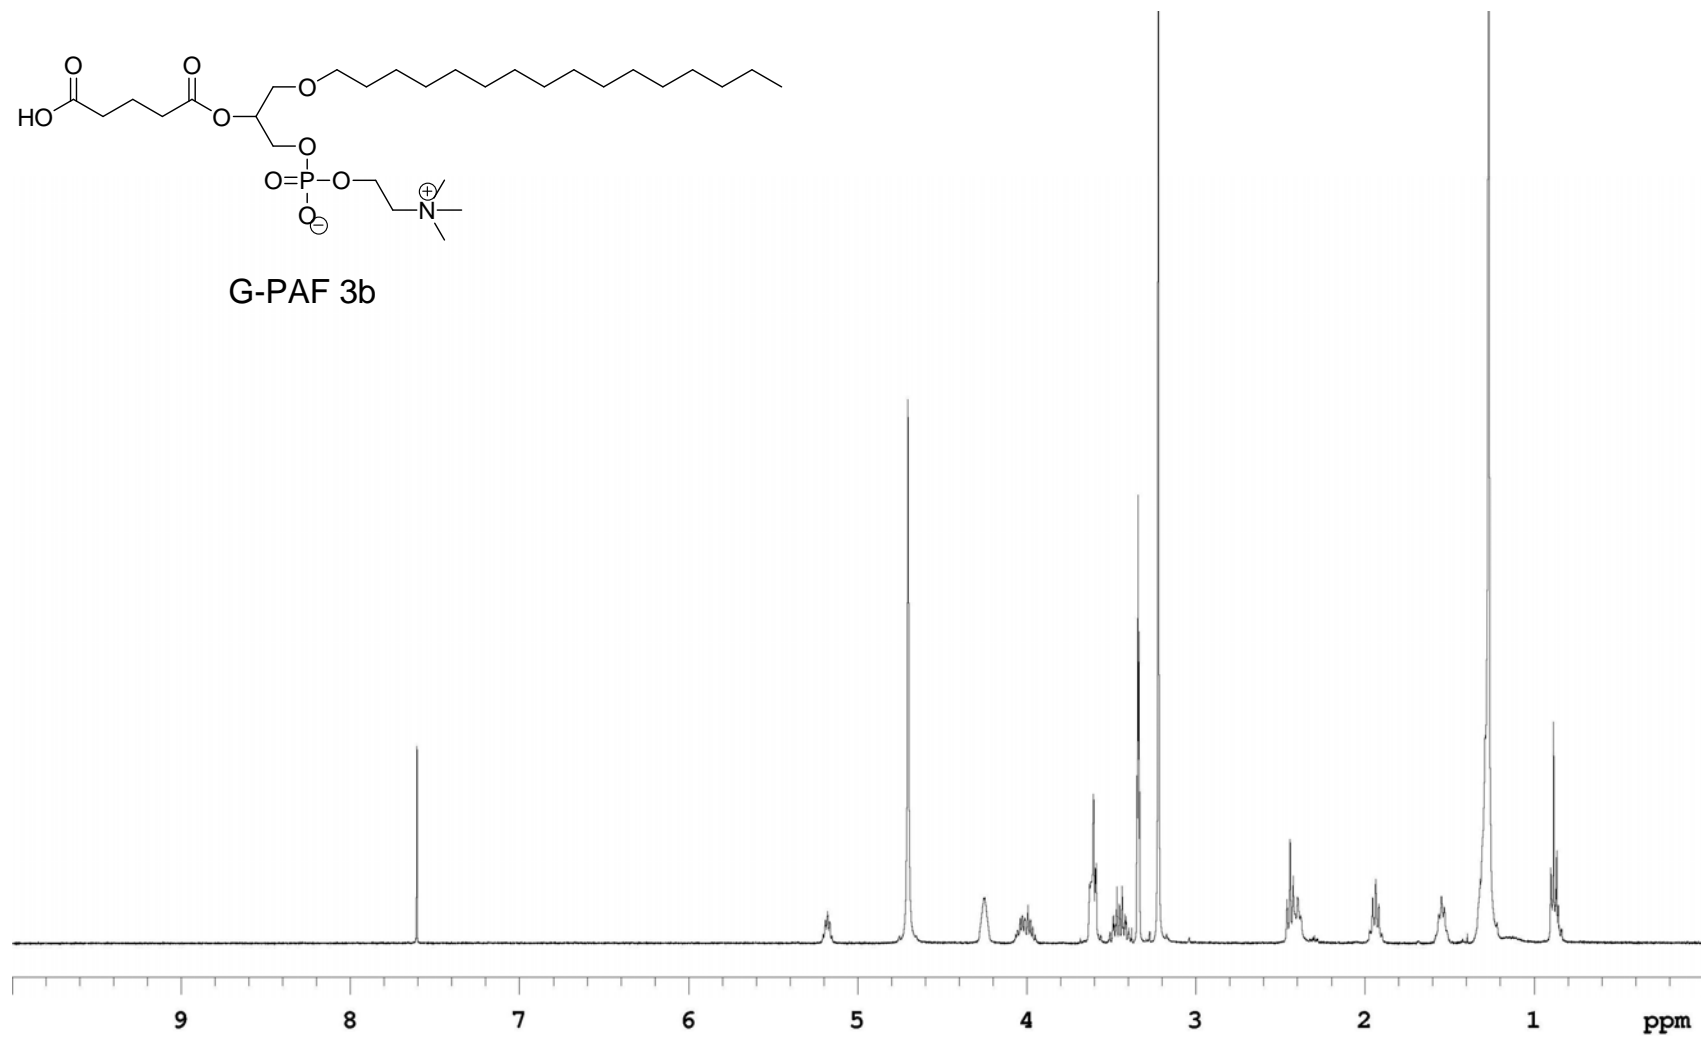

Figure S15. <sup>1</sup>H-NMR (400 M, CDCl<sub>3</sub>+CD<sub>3</sub>OD) of G-PAF (3b).

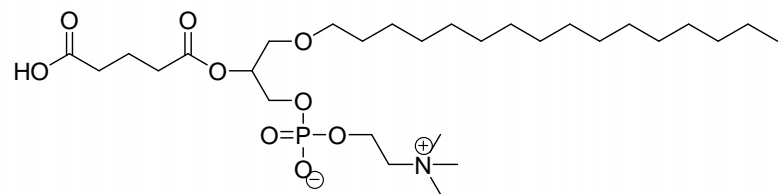

G-PAF 3b

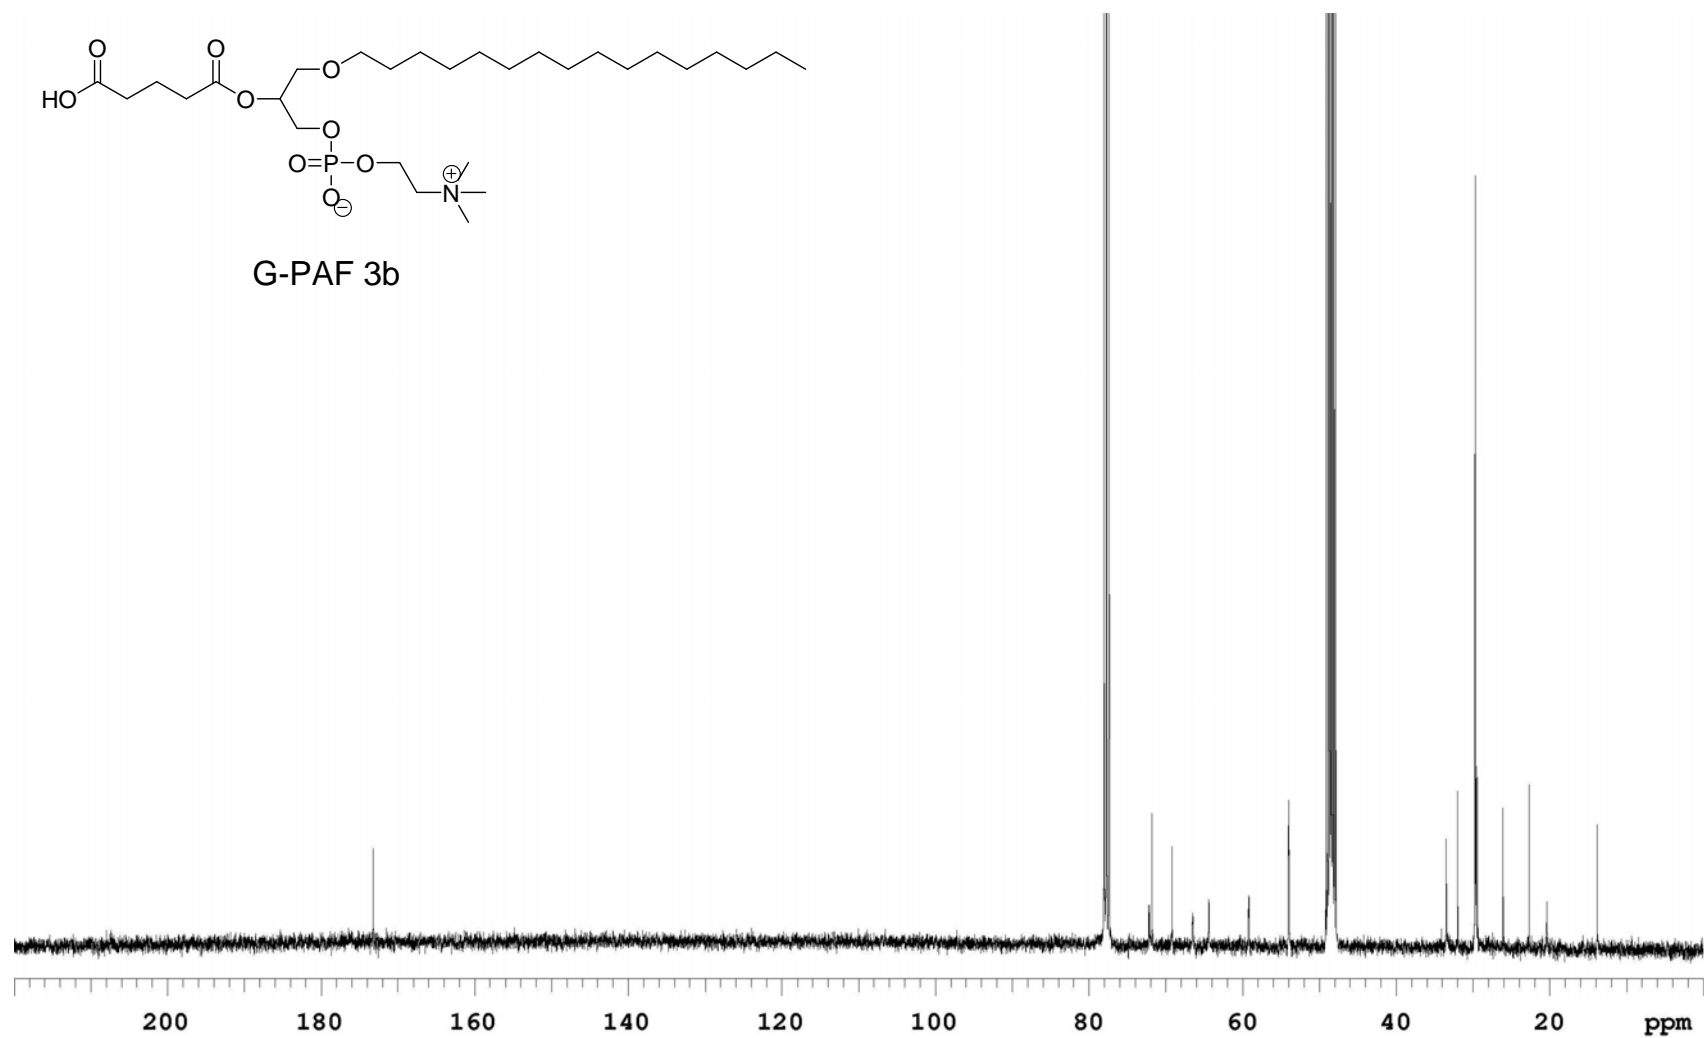

Figure S16. <sup>13</sup>C-NMR (100 M, CDCl<sub>3</sub>+CD<sub>3</sub>OD) of G-PAF (3b).

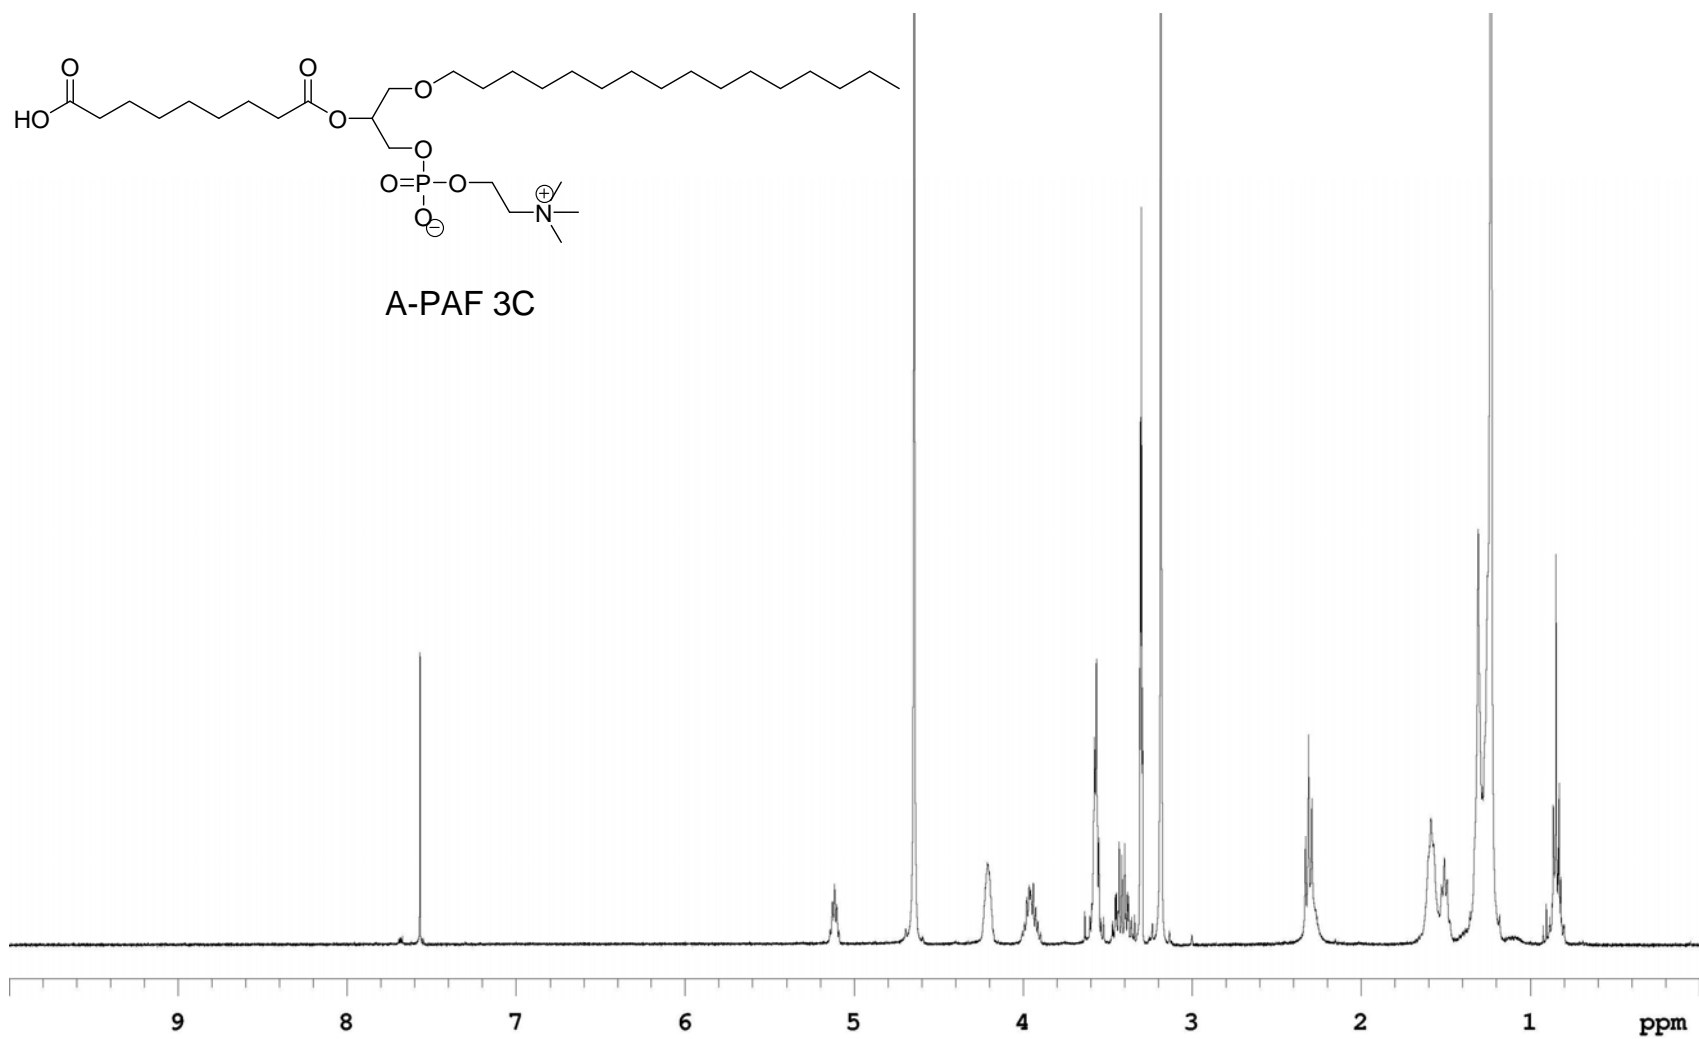

Figure S17. <sup>1</sup>H-NMR (400 M, CDCl<sub>3</sub>+CD<sub>3</sub>OD) of A-PAF (3c).

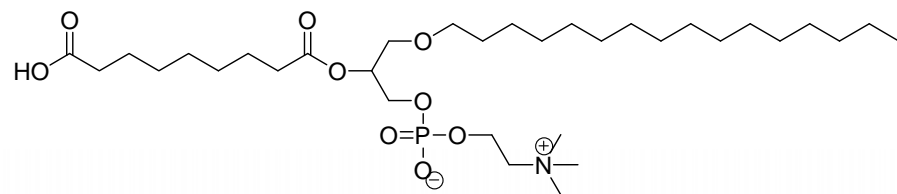

A-PAF 3C

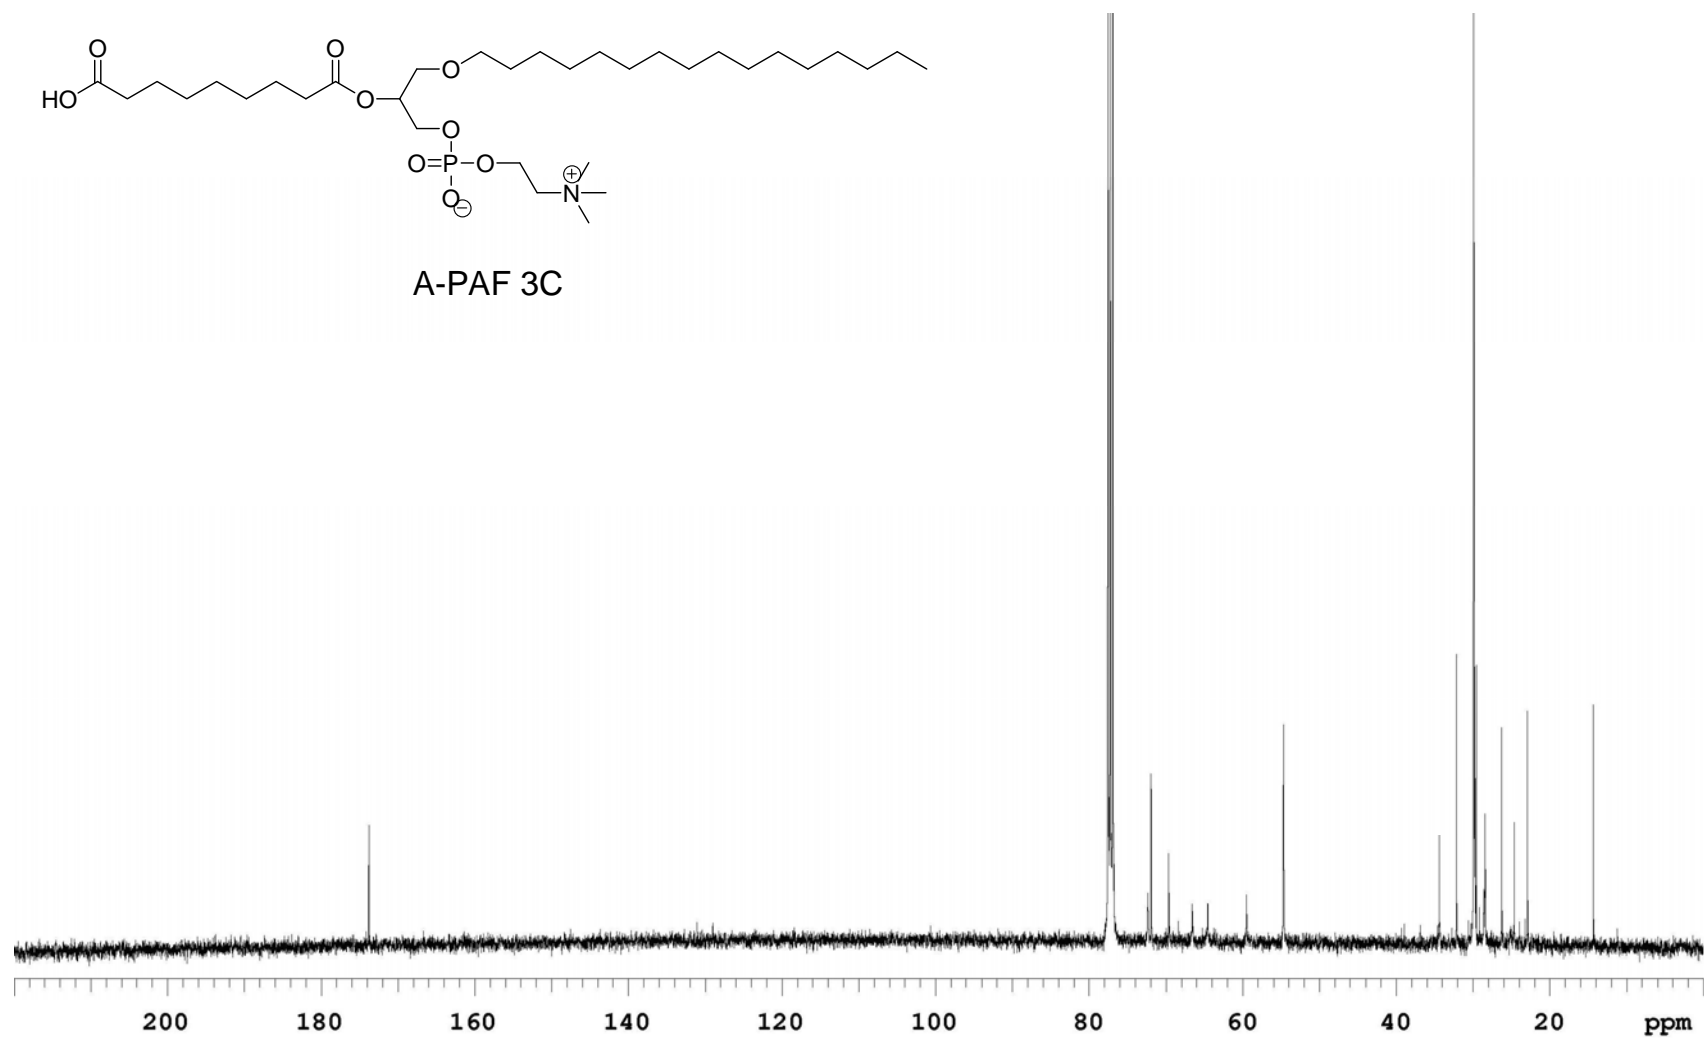

Figure S18. <sup>13</sup>C-NMR (100 M, CDCl<sub>3</sub>+CD<sub>3</sub>OD) of A-PAF (3c).

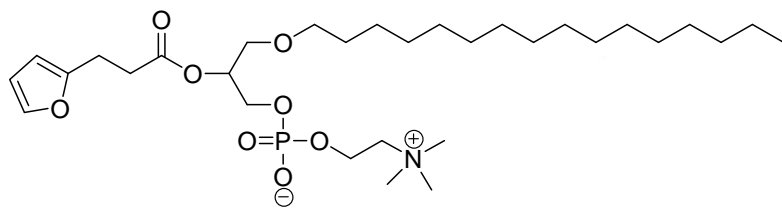

12a

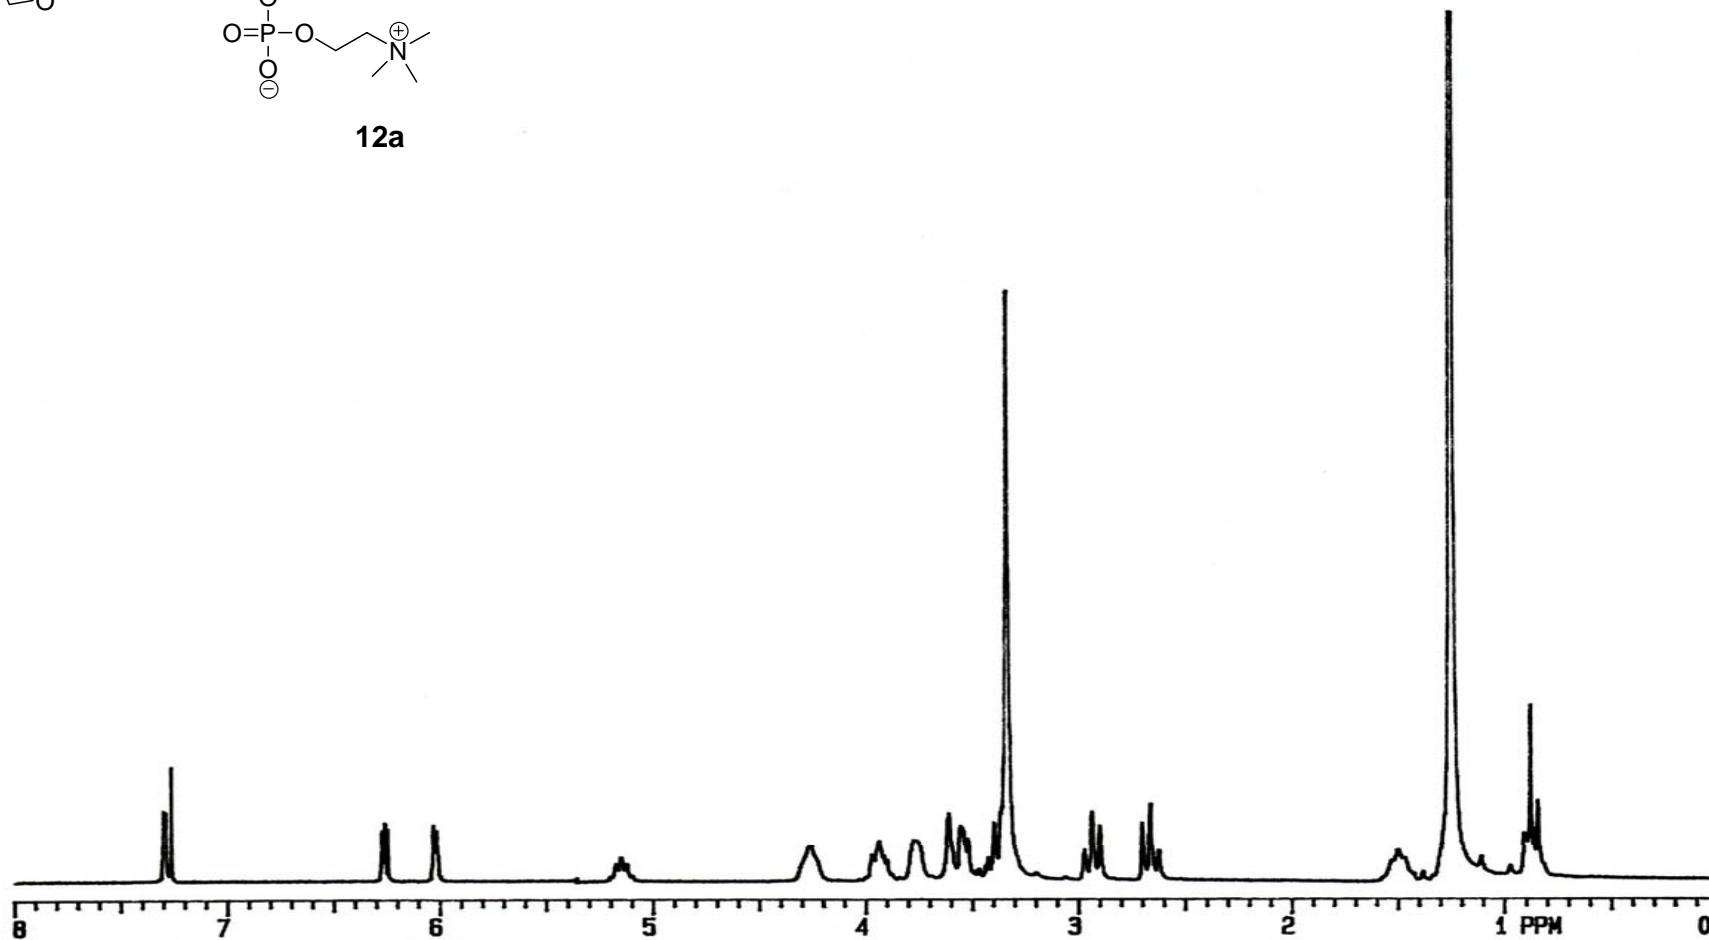

Figure S19.  $^1\text{H-NMR}$  (200 M,  $\text{CDCl}_3$ ) of 1-O-Hexadecyl-2-[3-(2-furyl)propanoyl]-sn-glycero-3-phosphatidylcholine

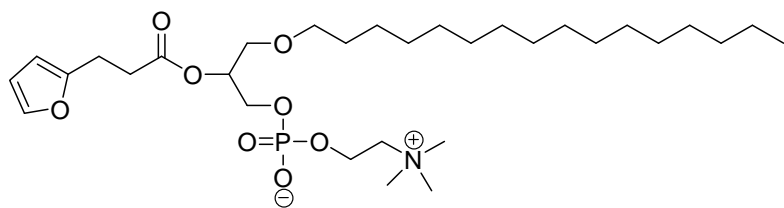

**12a**

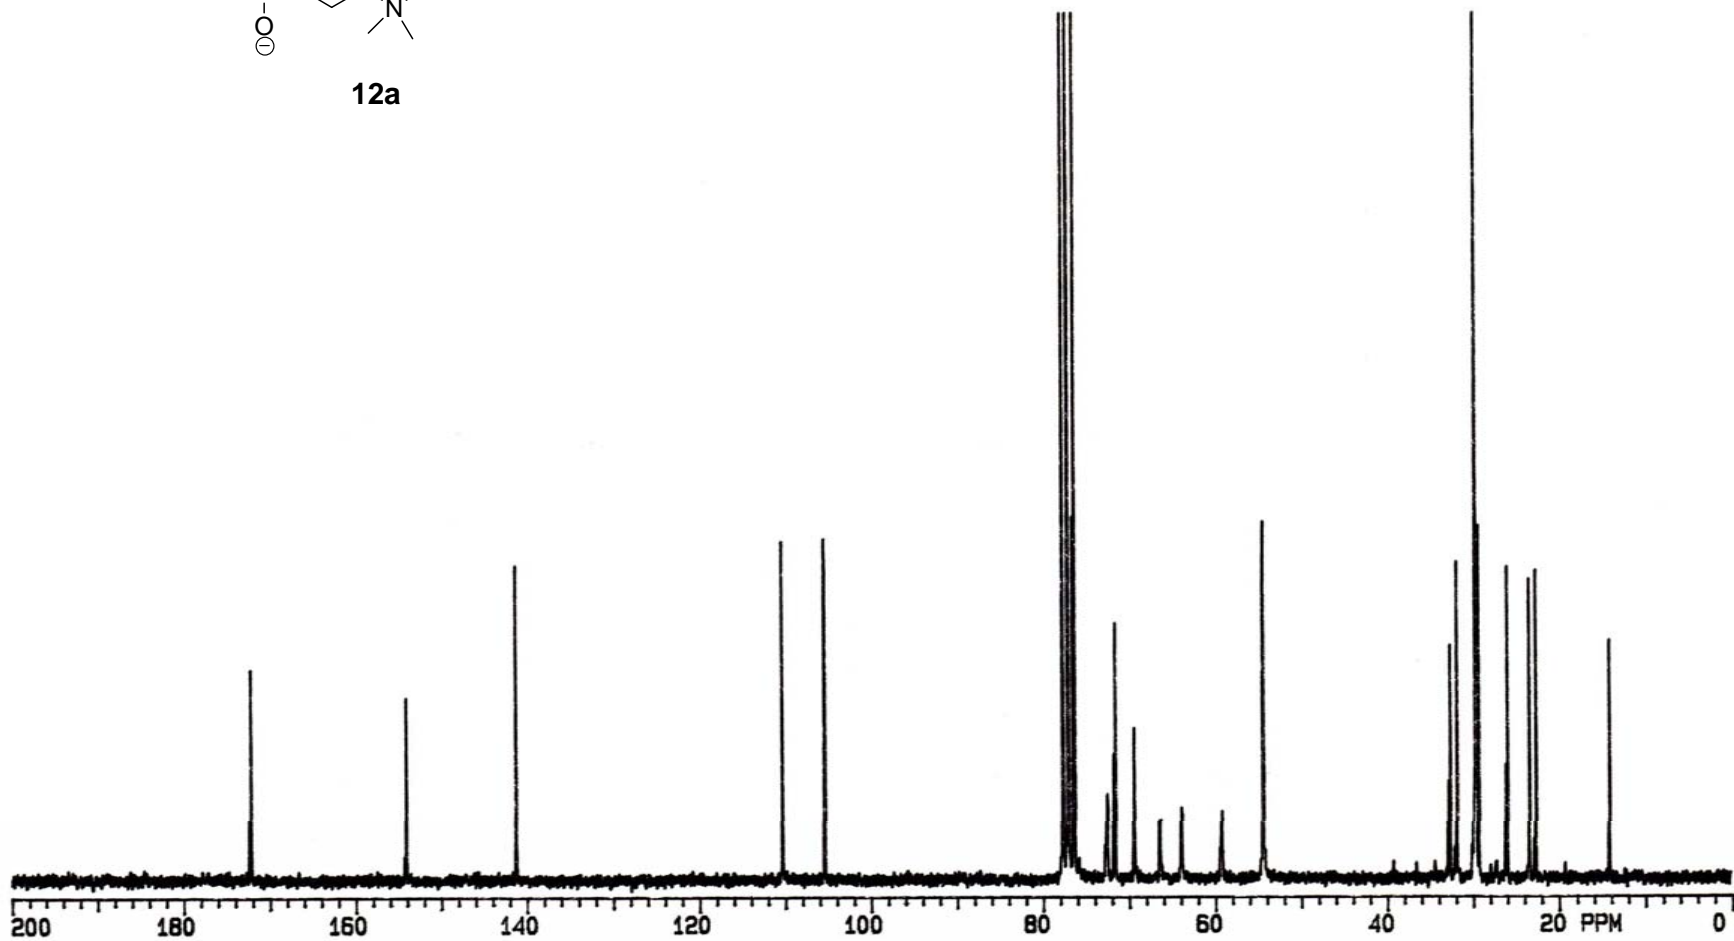

**Figure S20.**  $^{13}\text{C}$ -NMR (50 M,  $\text{CDCl}_3$ ) of 1-O-Hexadecyl-2-[3-(2-furyl)propanoyl]-sn-glycero-3-phosphatidylcholine



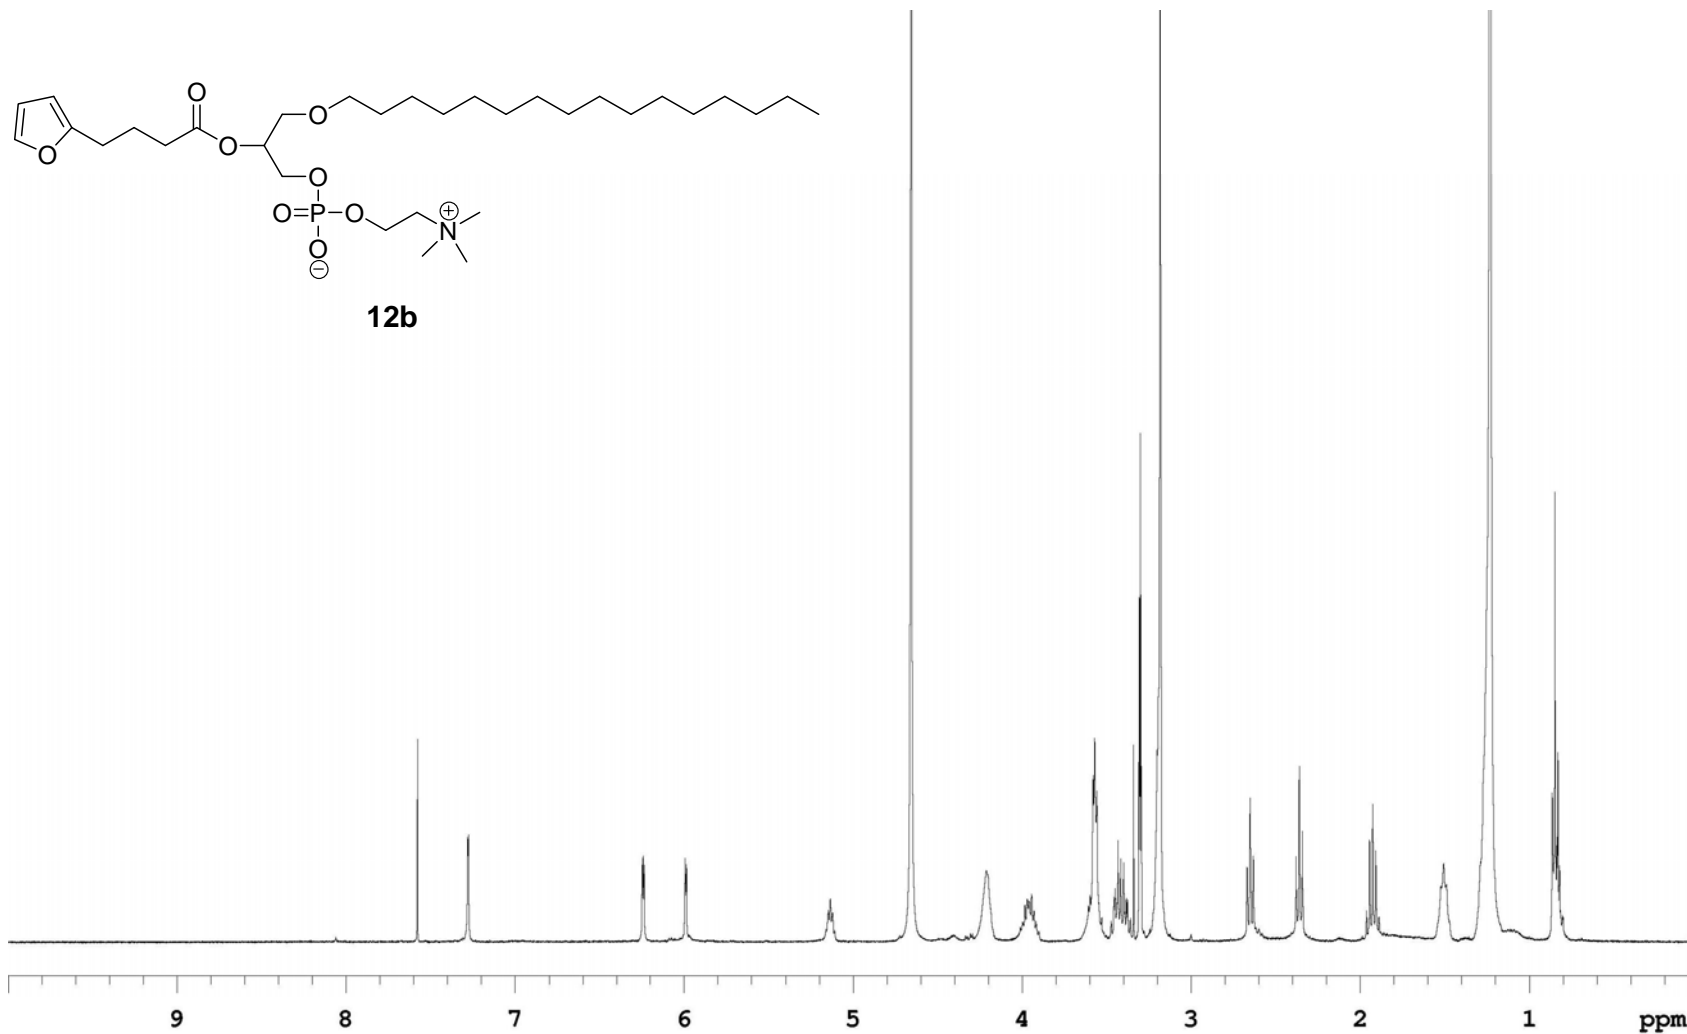

Figure S21. <sup>1</sup>H-NMR (400 M, CDCl<sub>3</sub>+CD<sub>3</sub>OD) of 1-O-Hexadecyl-2-[4-(2-furyl)butanoyl]-sn-glycero-3-phosphatidylcholine (12b).

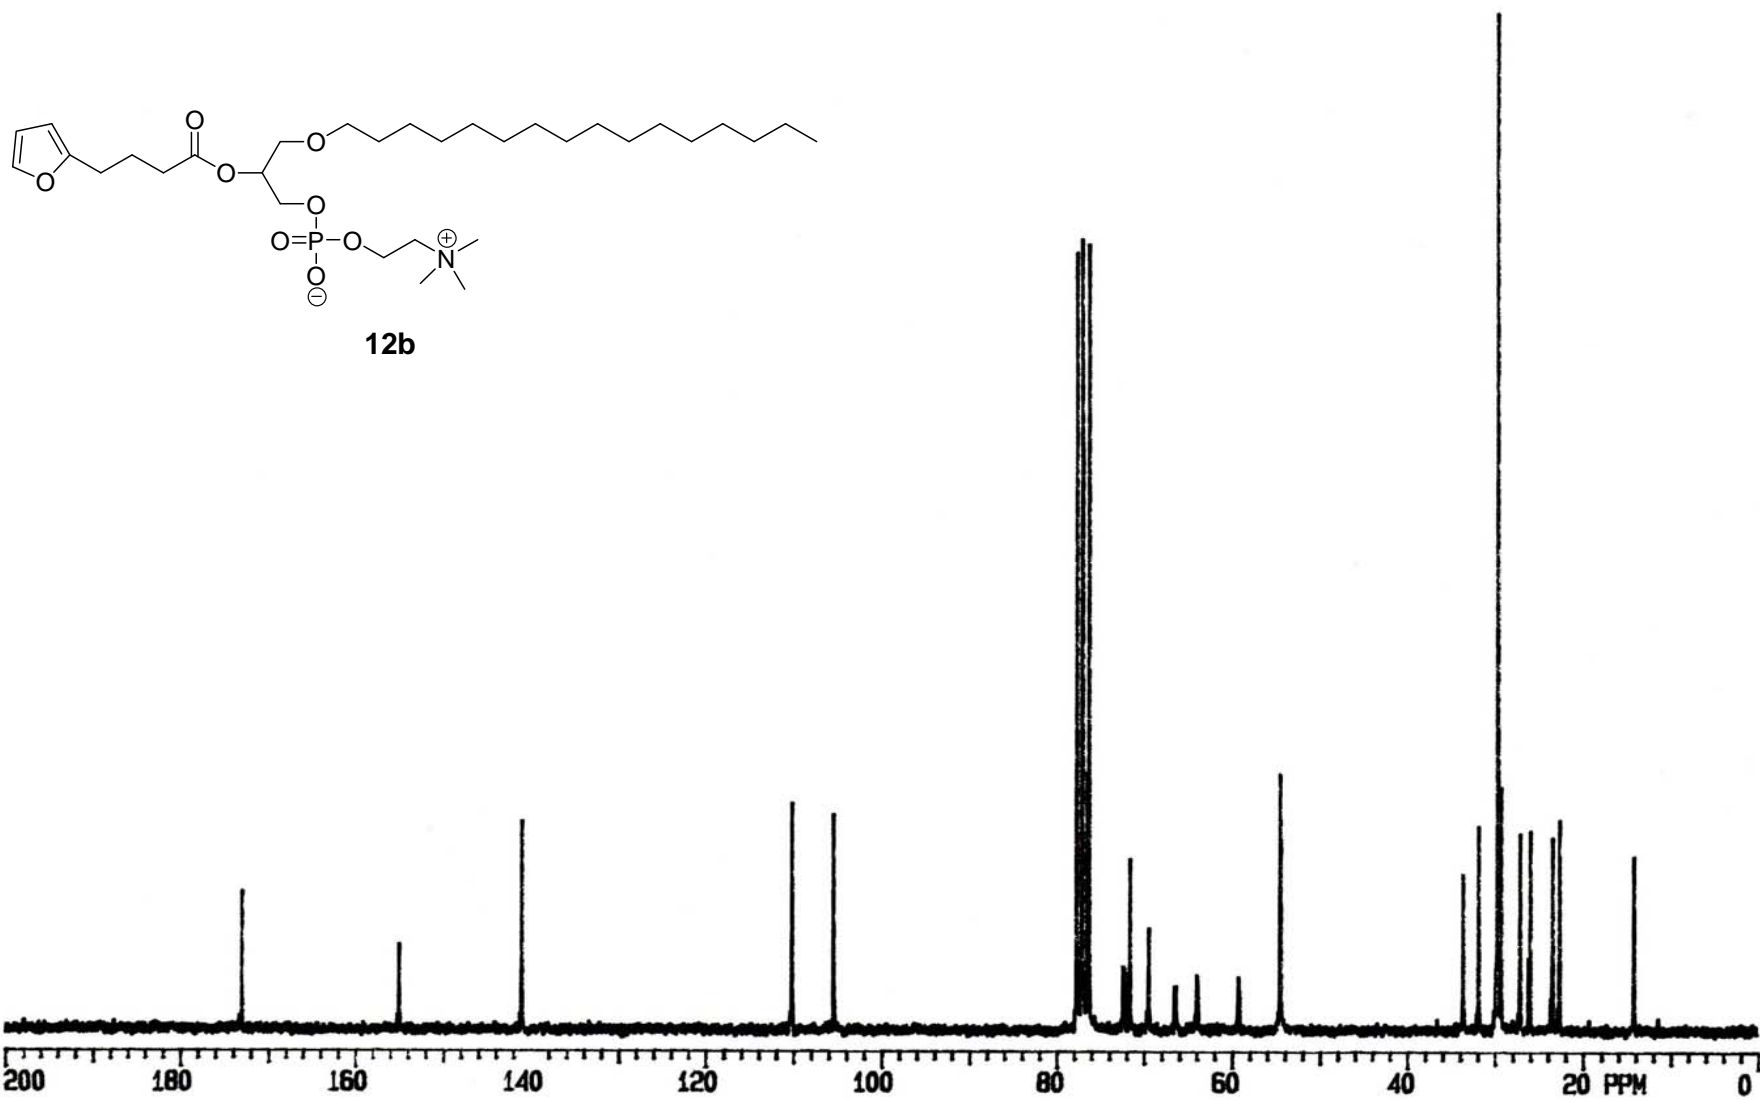

Figure S22. <sup>13</sup>C-NMR (50 M, CDCl<sub>3</sub>) of 1-O-Hexadecyl-2-[4-(2-furyl)butanoyl]-sn-glycerophosphatidylcholine (12b).

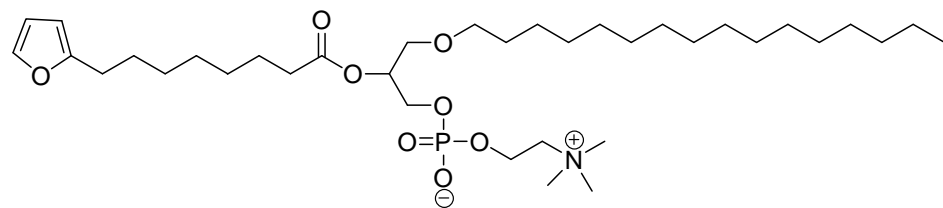

12c

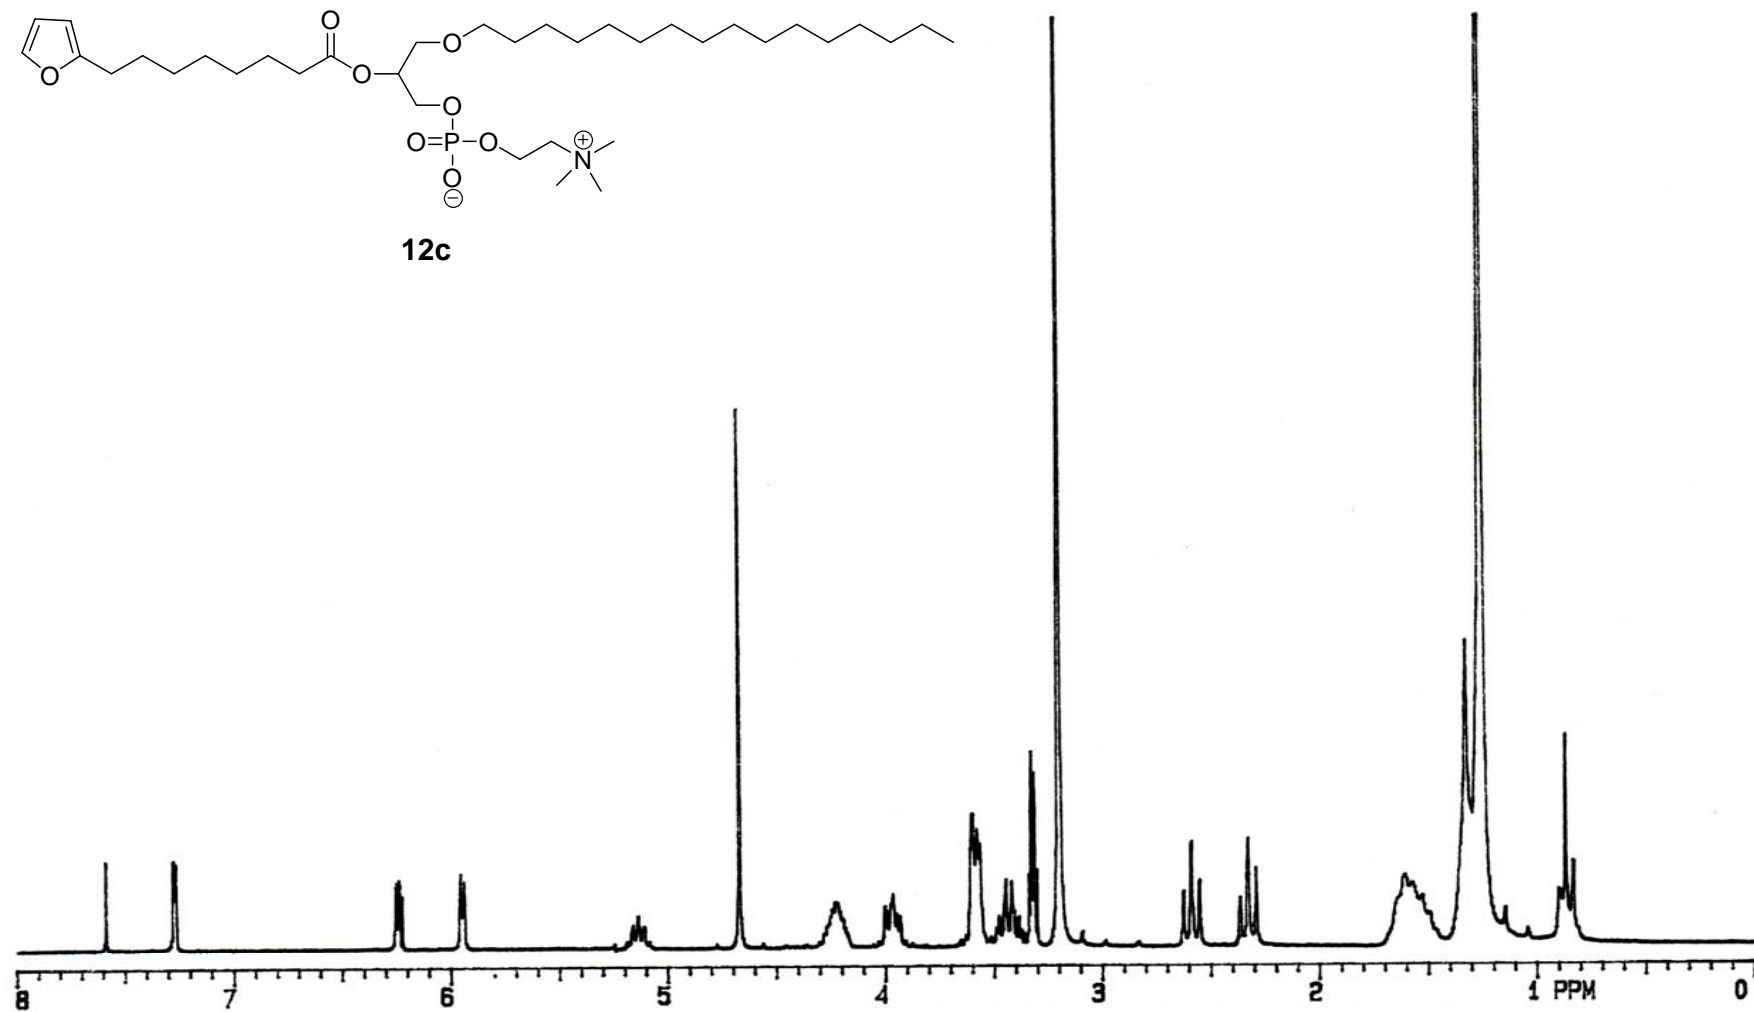

Figure S23.  $^1\text{H-NMR}$  (200 M,  $\text{CDCl}_3+\text{CD}_3\text{OD}$ ) of 1-O-Hexadecyl-2-[8-(2-furyl)octanoyl]-sn-glycero-3-phosphatidylcholine

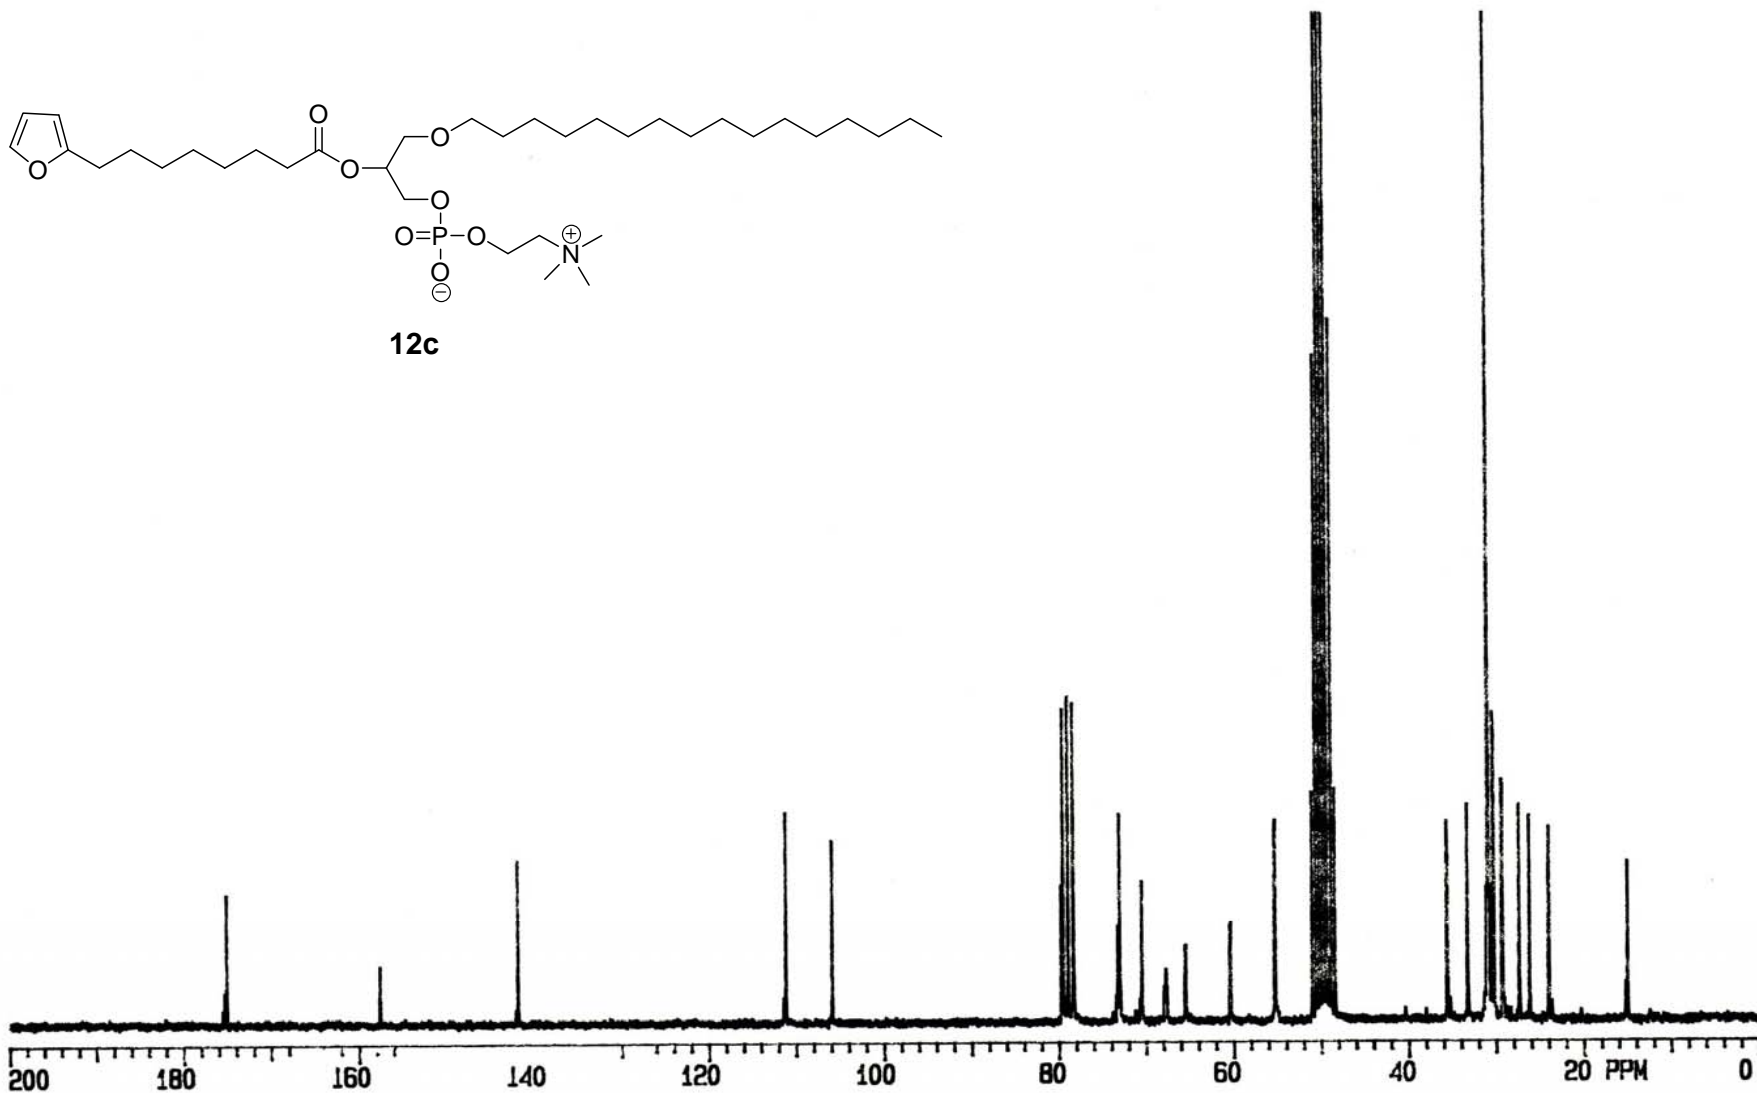

Figure S24. <sup>13</sup>C-NMR (50 M, CDCl<sub>3</sub>+CD<sub>3</sub>OD) of 1-O-Hexadecyl-2-[8-(2-furyl)octanoyl]-sn-glycero-3-phosphatidylcholine

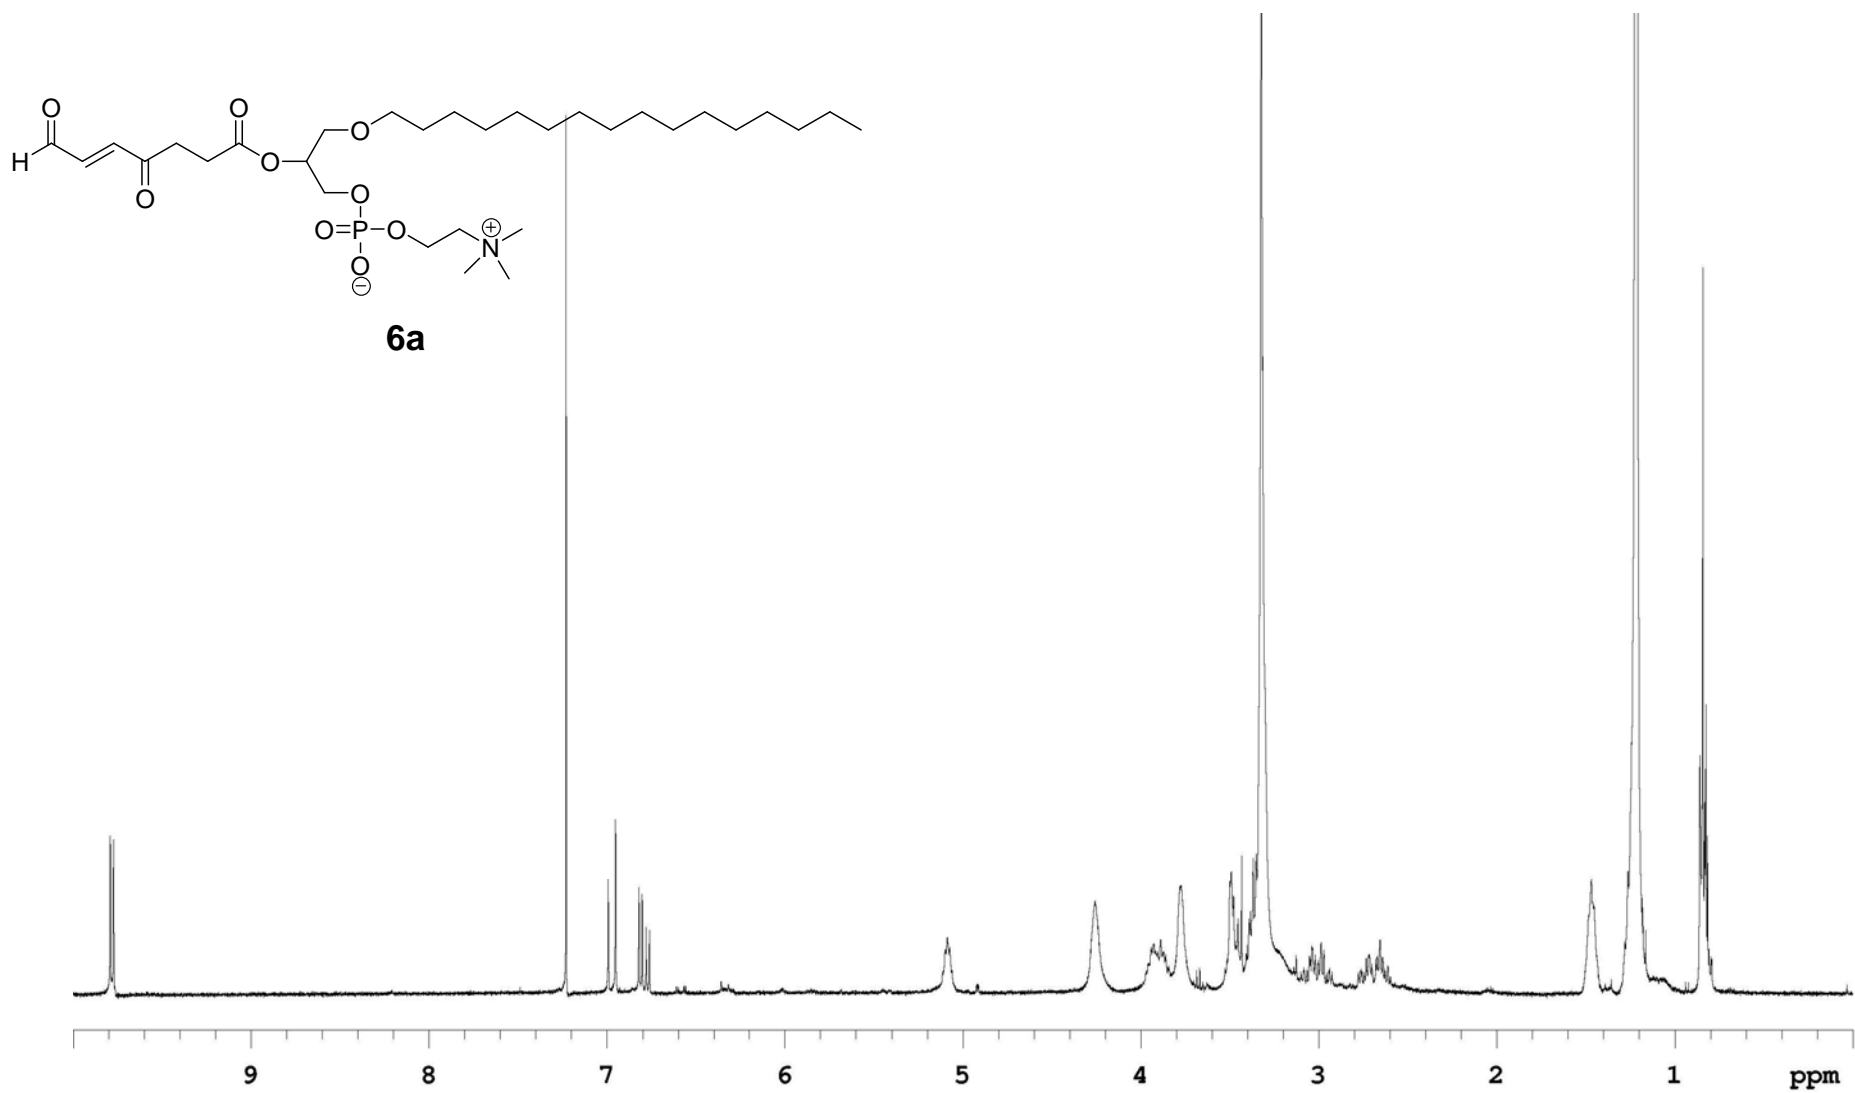

Figure S25. <sup>1</sup>H-NMR (400 M, CDCl<sub>3</sub>) of KOHA-PAF (6a).

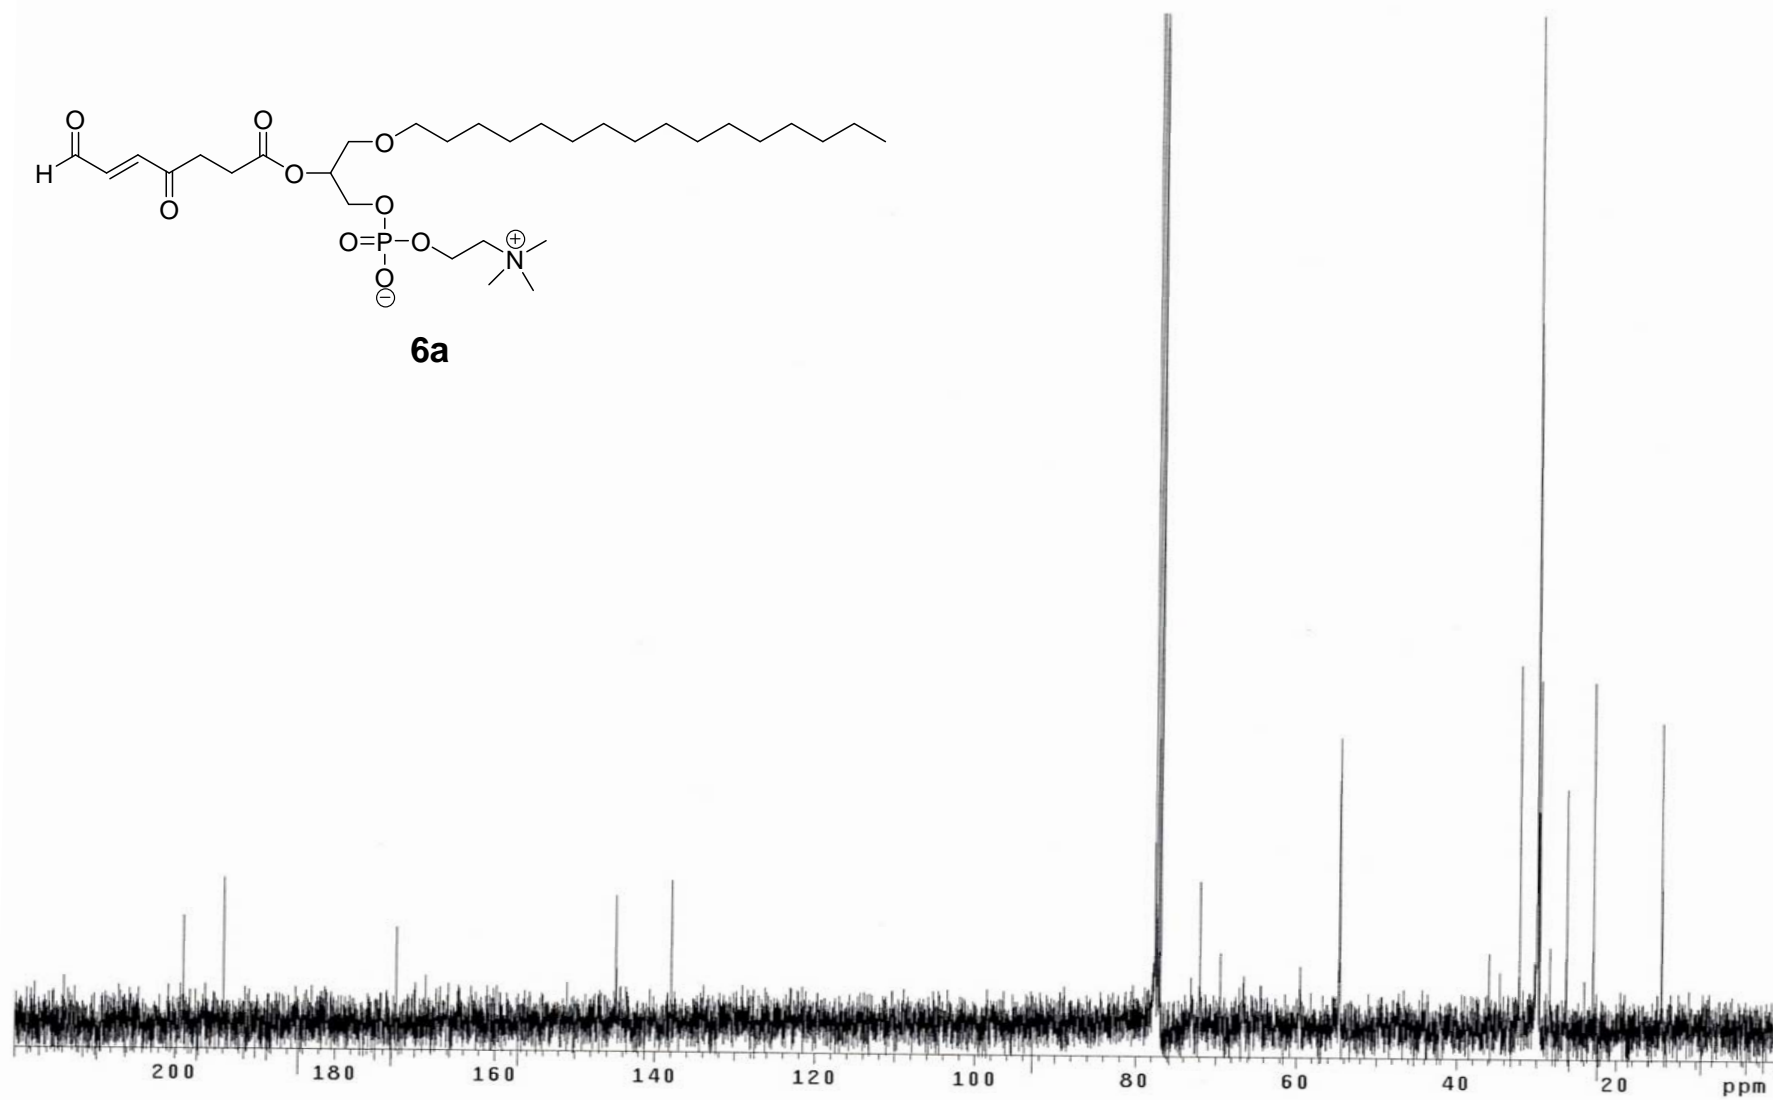

Figure S26. <sup>13</sup>C-NMR (100 M, CDCl<sub>3</sub>) of KOHA-PAF (6a).

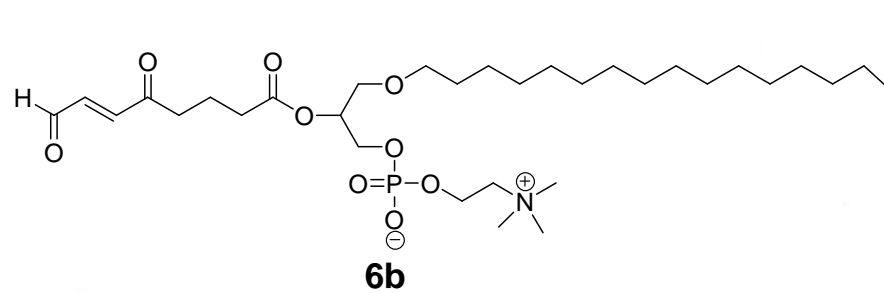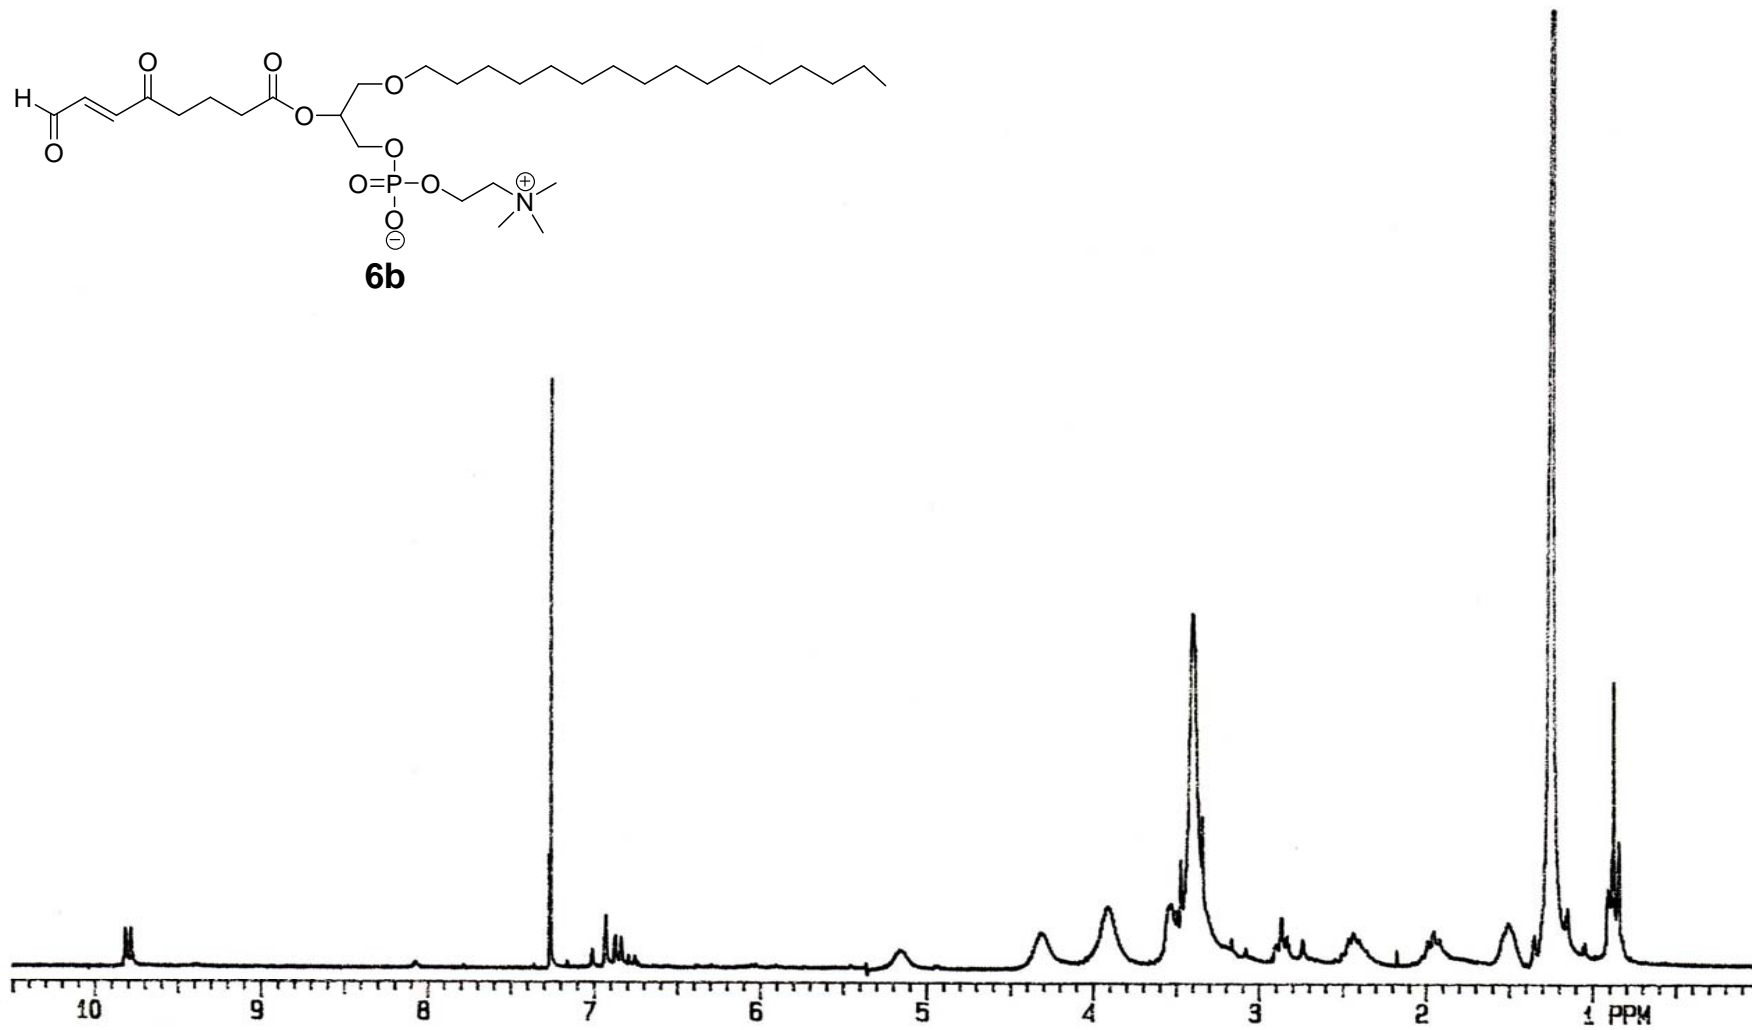

Figure S27. <sup>1</sup>H-NMR (200 M, CDCl<sub>3</sub>) of KOOA-PAF (6b).

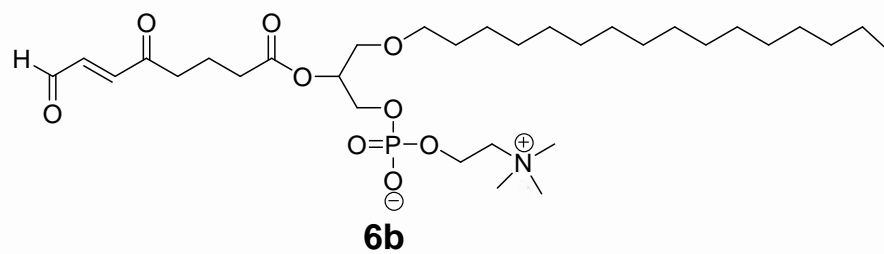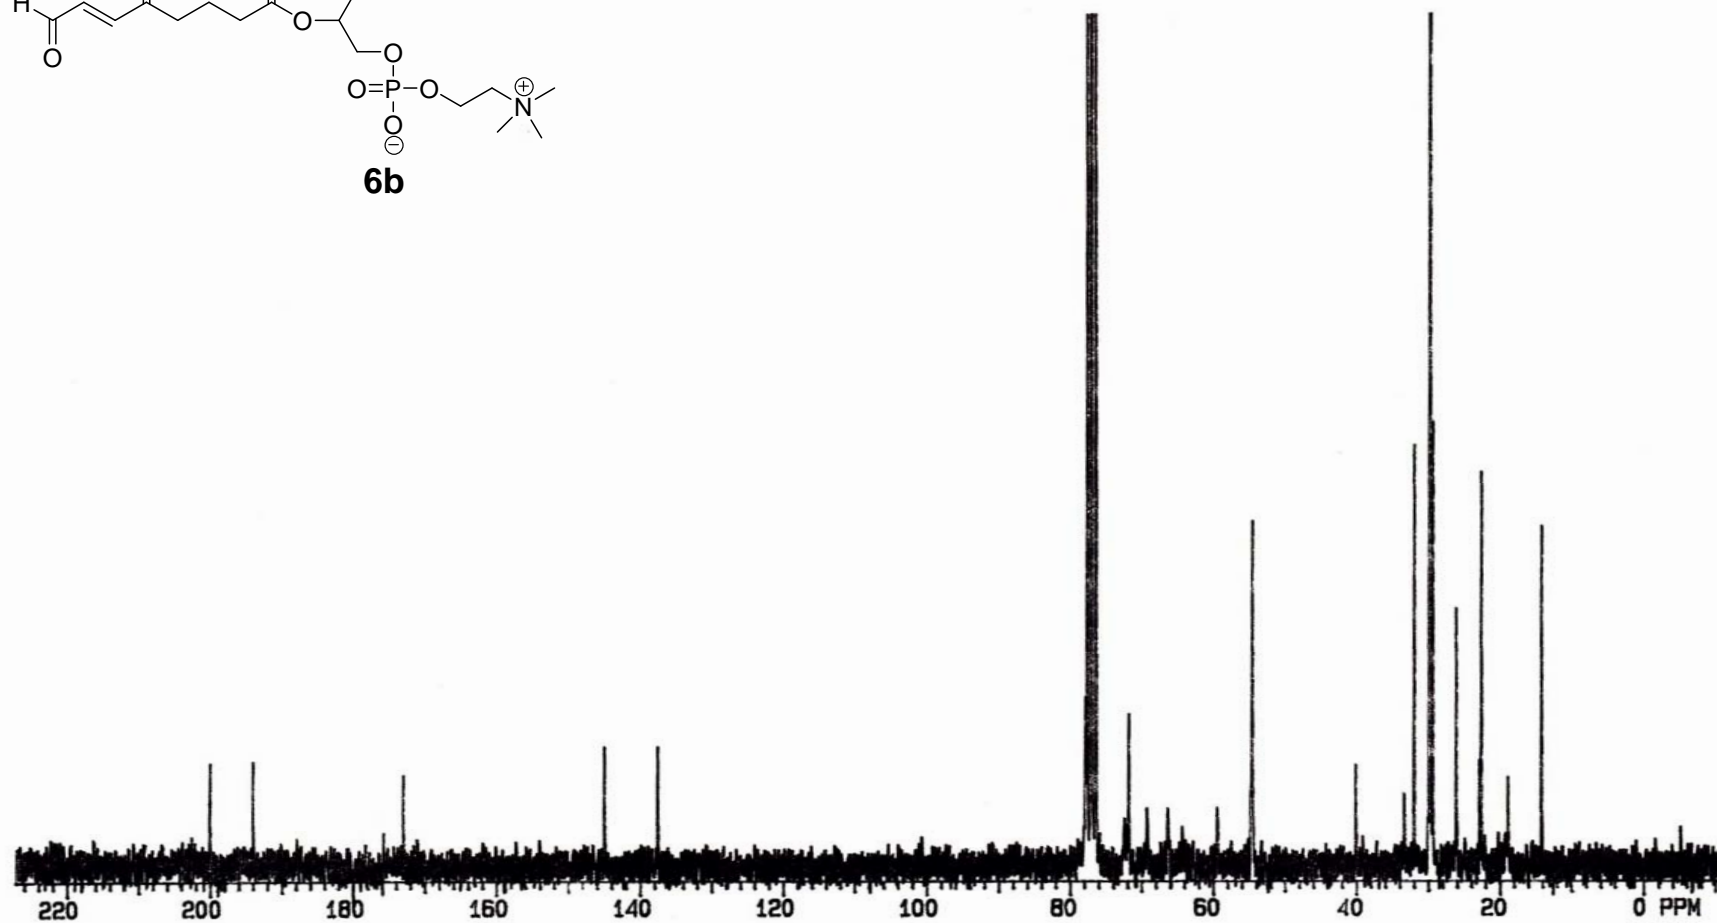

Figure S28.  $^{13}\text{C}$ -NMR (50 M,  $\text{CDCl}_3$ ) of KOOA-PAF (6b).



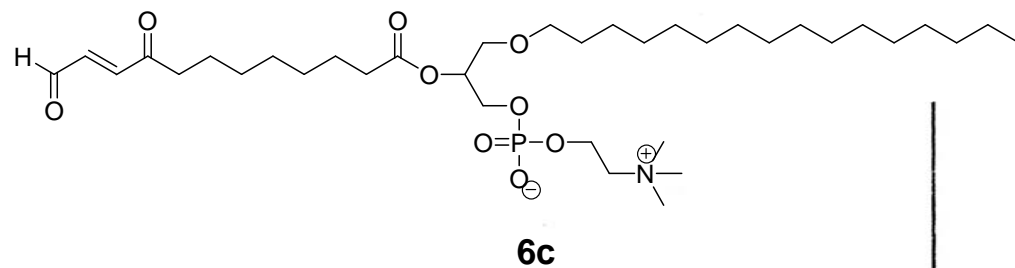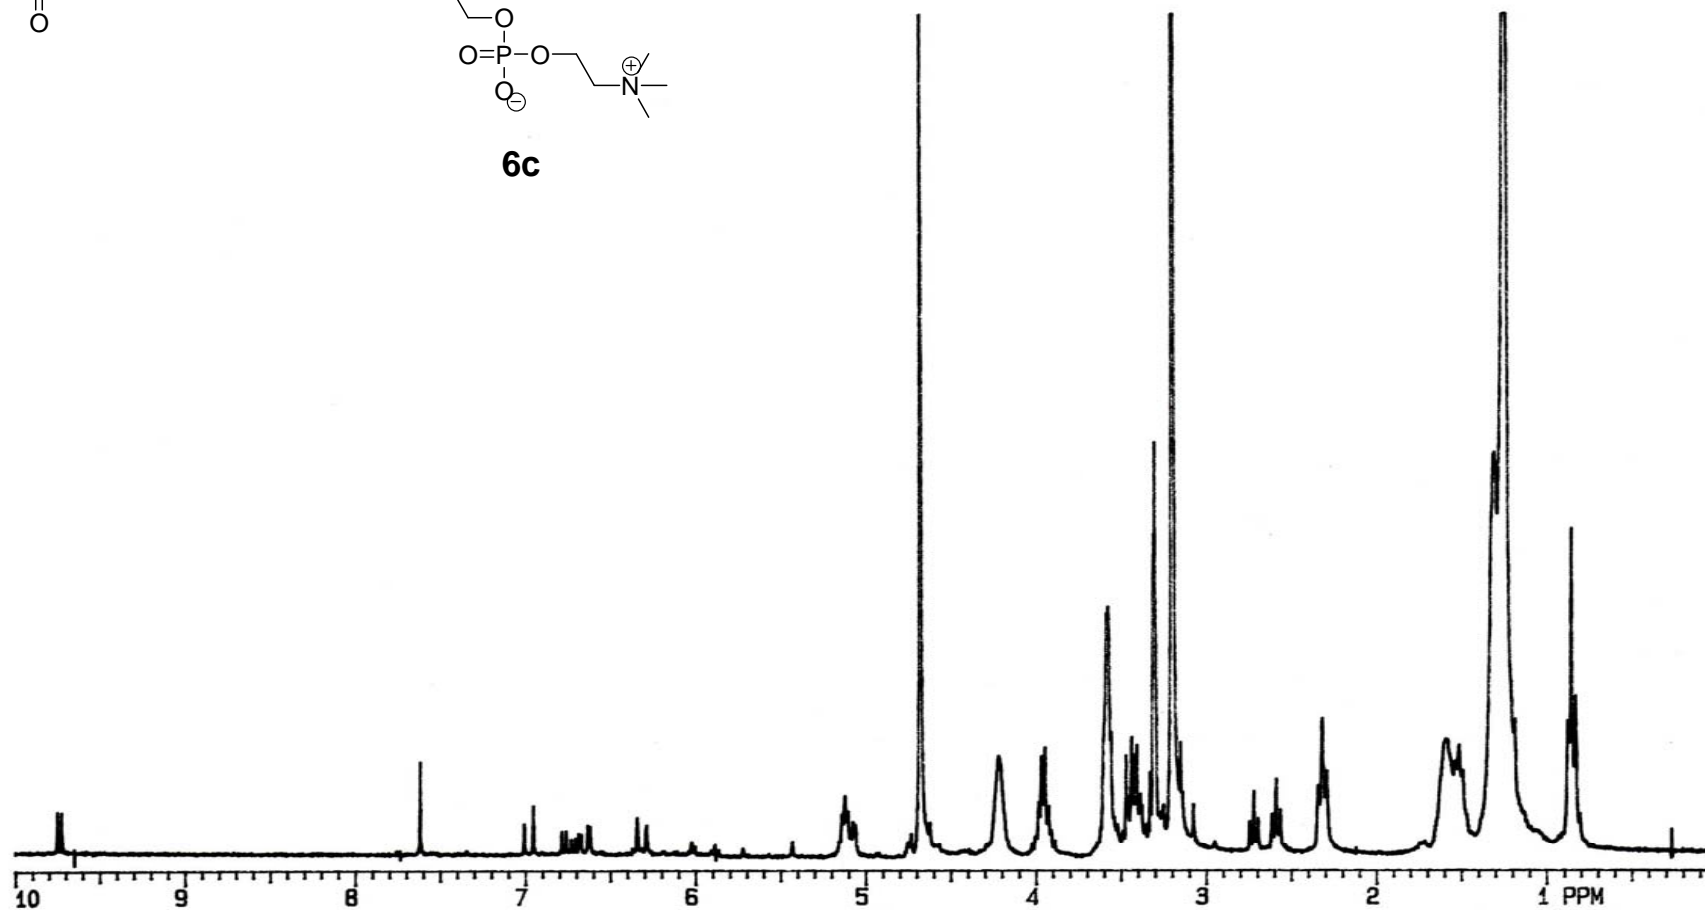

Figure S29. <sup>1</sup>H-NMR (300 M, CDCl<sub>3</sub>+CD<sub>3</sub>OD) of KODA-PAF (6c).

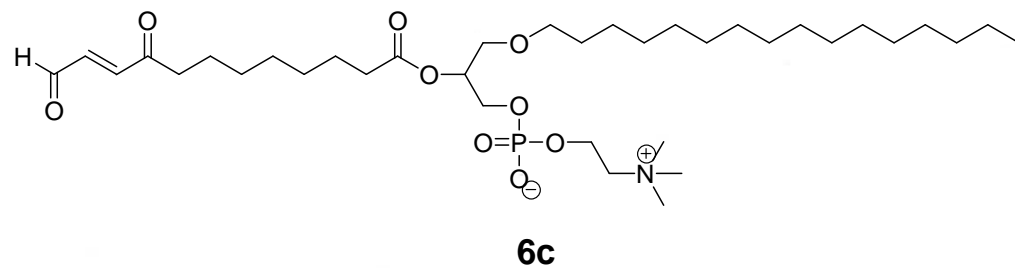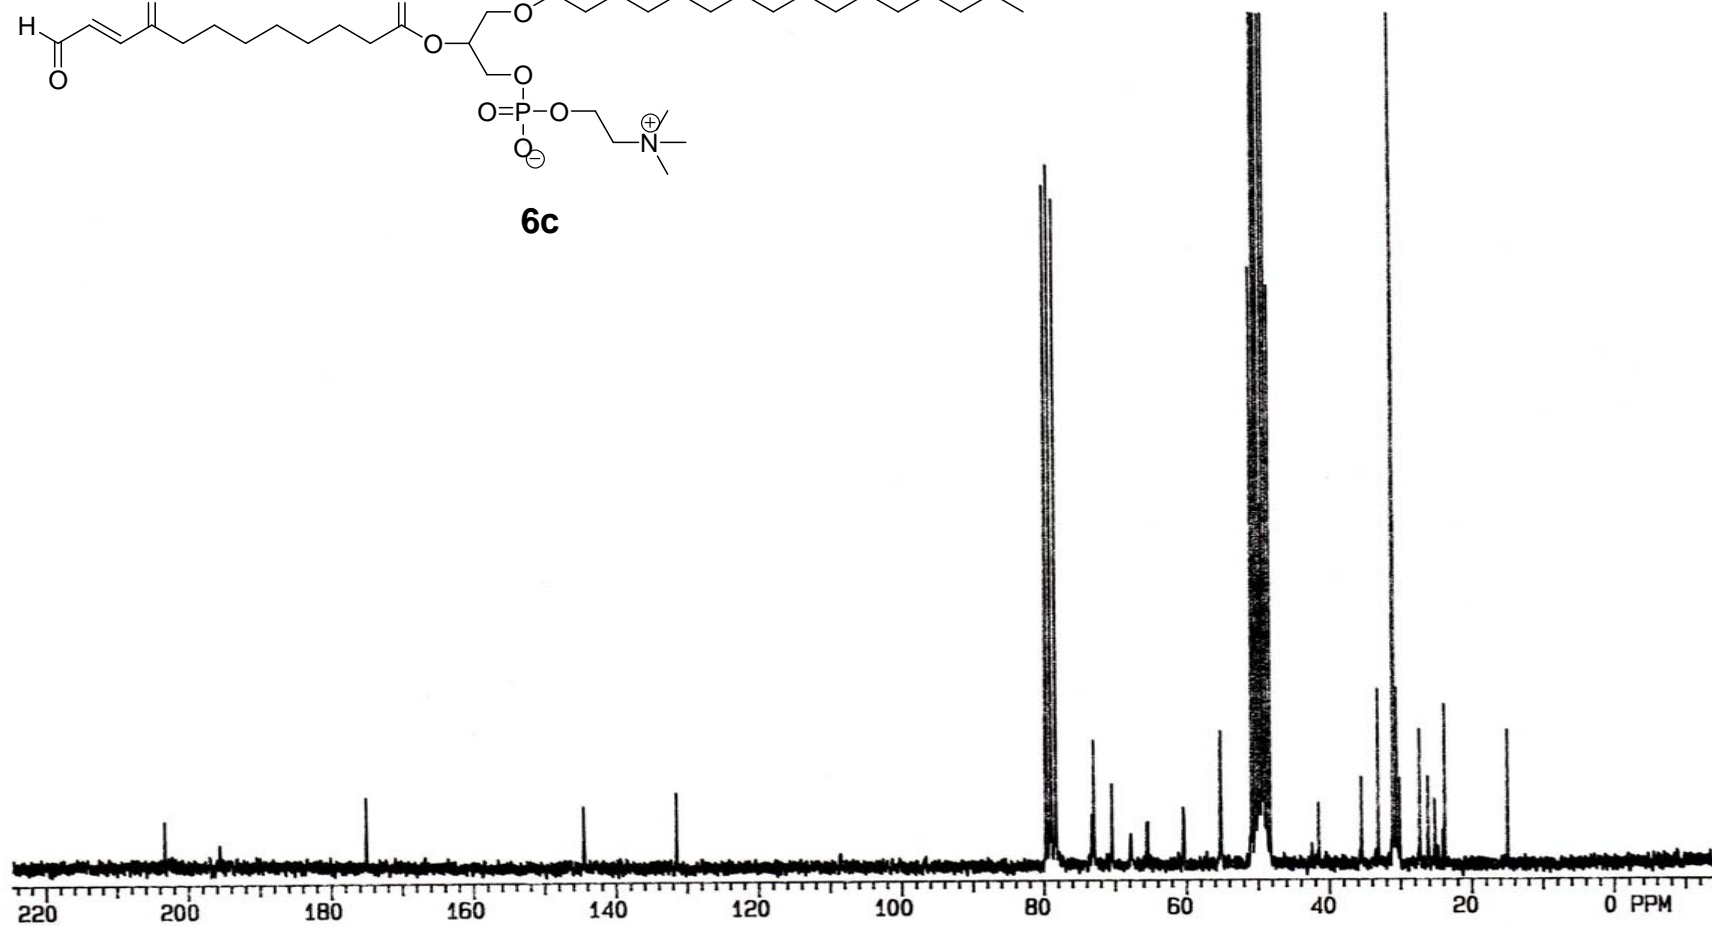

Figure S30.  $^{13}\text{C}$ -NMR (50 M,  $\text{CDCl}_3+\text{CD}_3\text{OD}$ ) of KODA-PAF (6c).

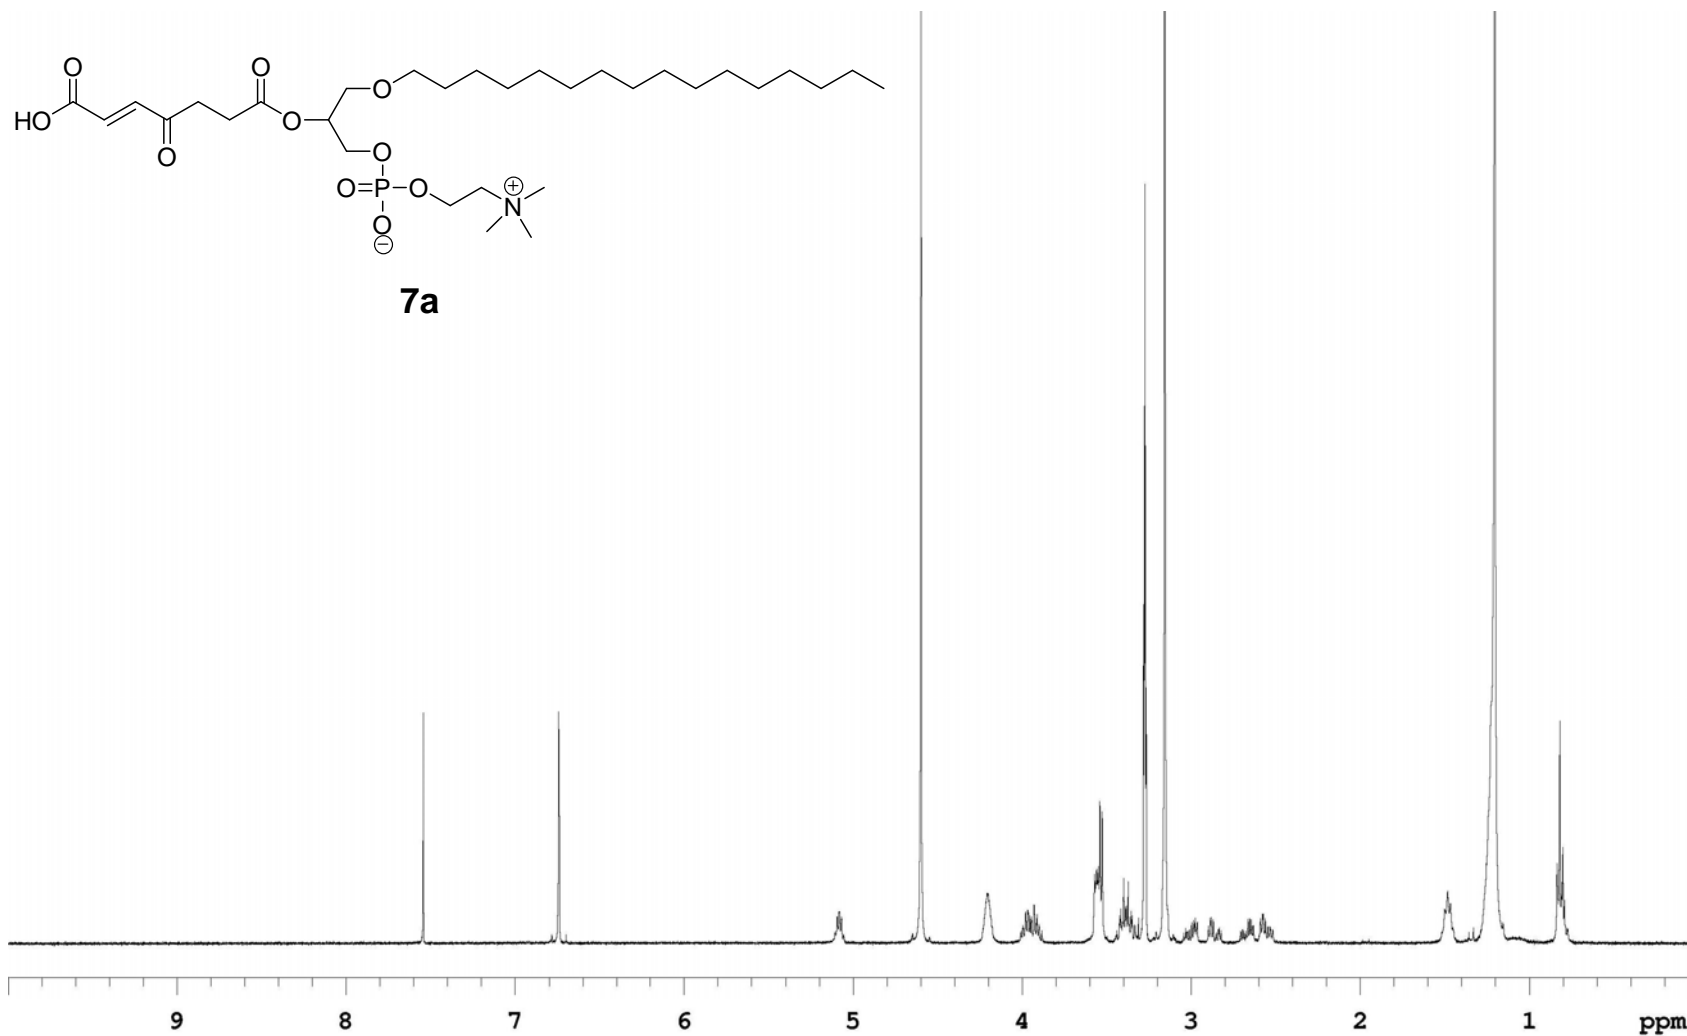

Figure S31. <sup>1</sup>H-NMR (400 M, CDCl<sub>3</sub>+CD<sub>3</sub>OD) of KHdiA-PAF (7a).

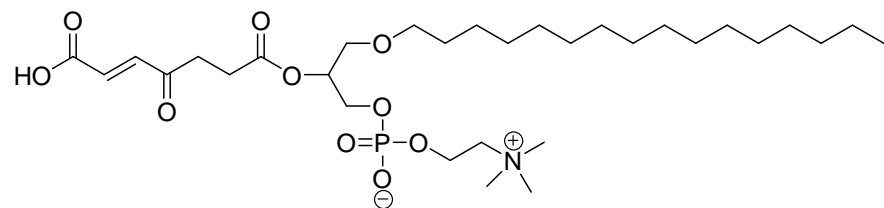

**7a**

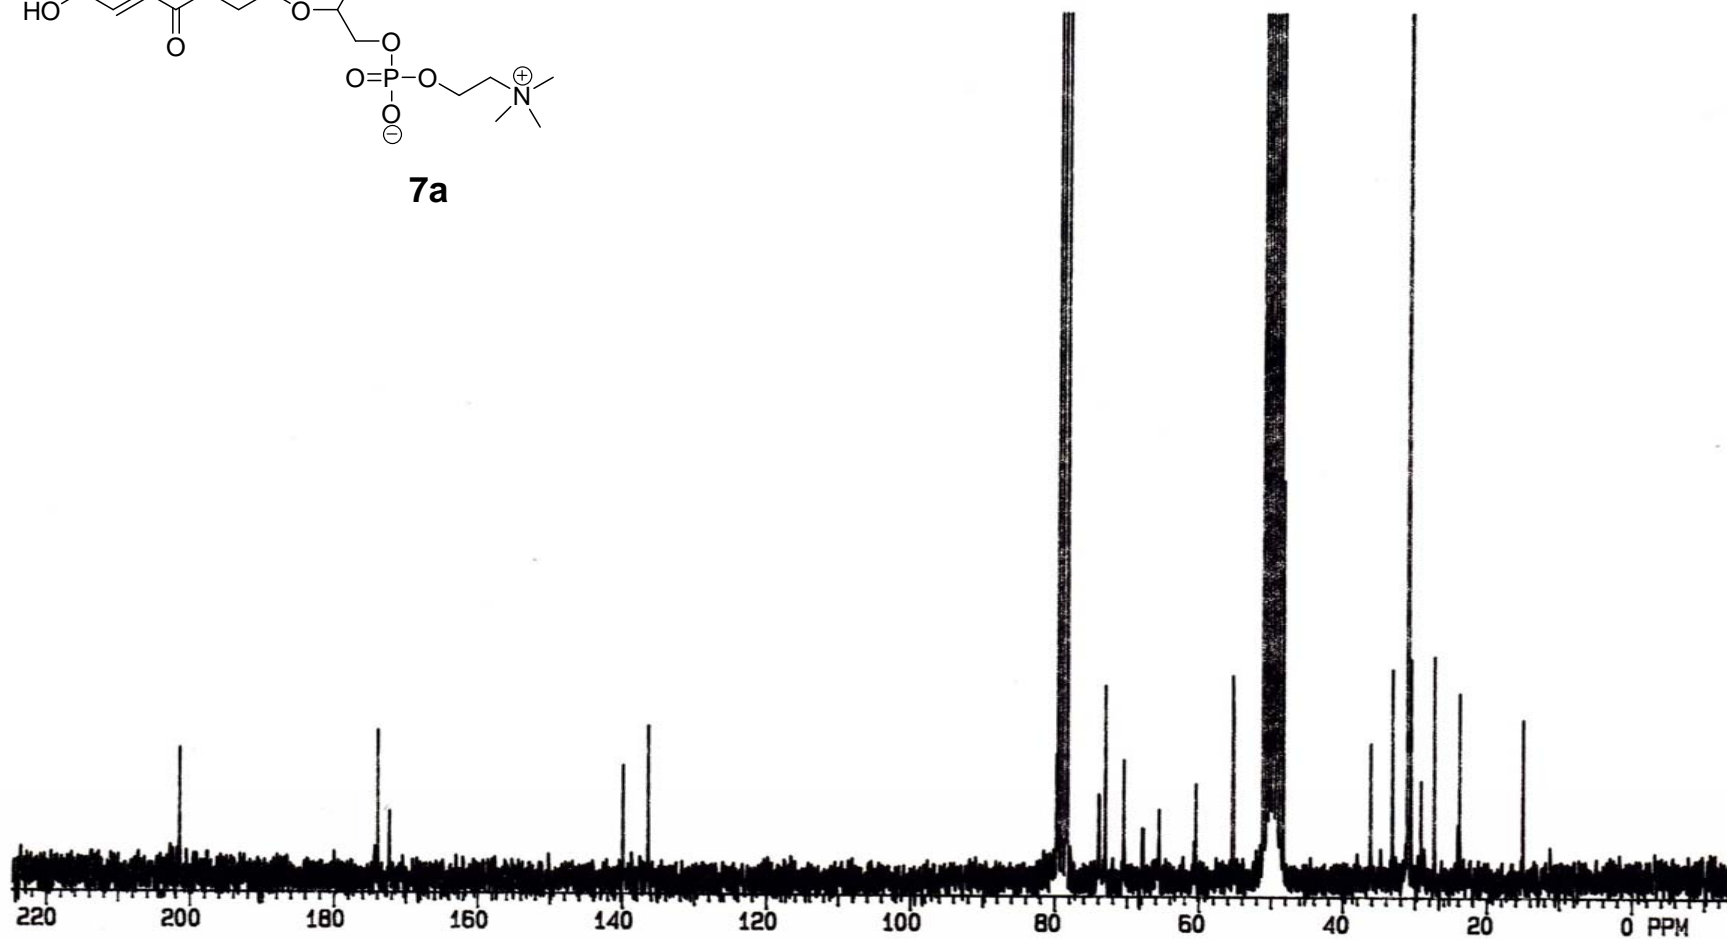

Figure S32. <sup>13</sup>C-NMR (50 M, CDCl<sub>3</sub>+CD<sub>3</sub>OD) of KHdiA-PAF (7a).

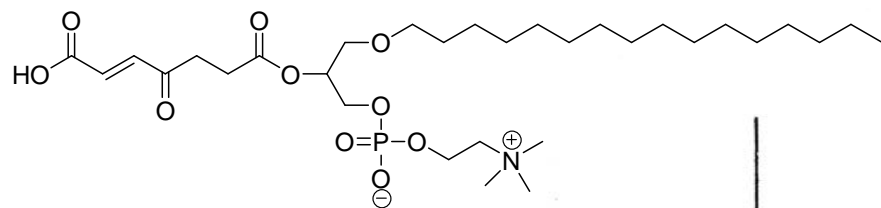

7a

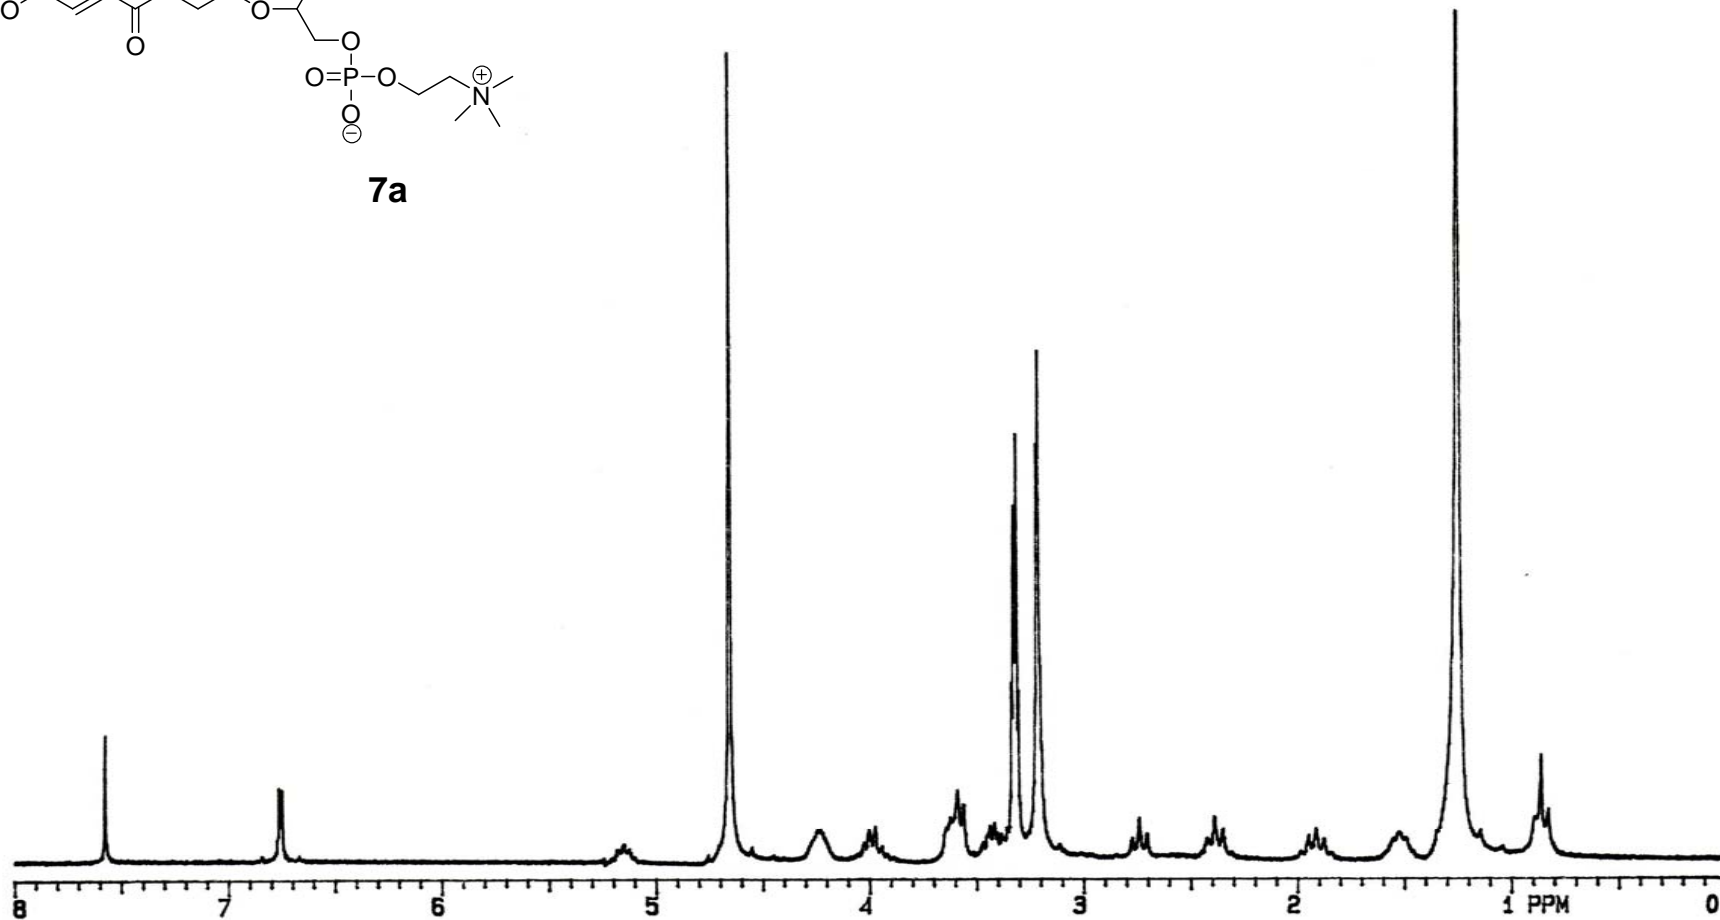

Figure S33.  $^1\text{H-NMR}$  (200 M,  $\text{CDCl}_3+\text{CD}_3\text{OD}$ ) of KODiA-PAF (7b).

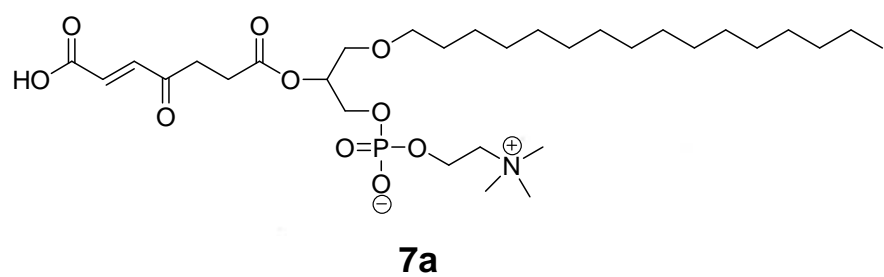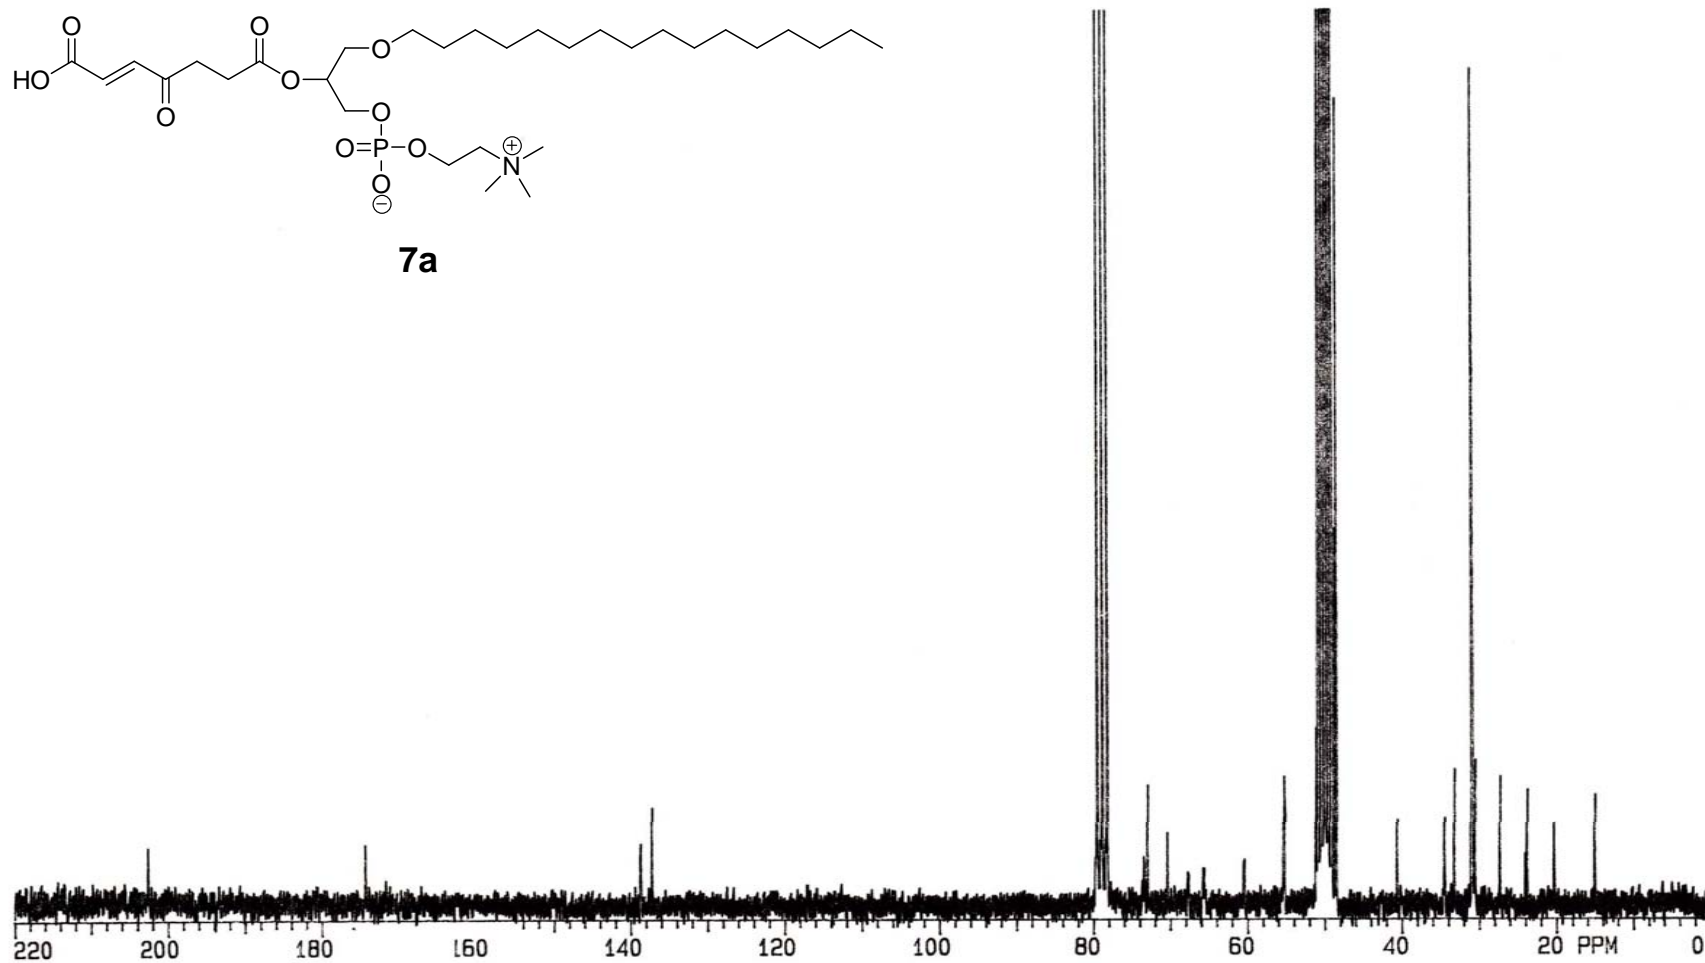

Figure S34.  $^{13}\text{C}$ -NMR (50 M,  $\text{CDCl}_3+\text{CD}_3\text{OD}$ ) of KODiA-PAF (7b).

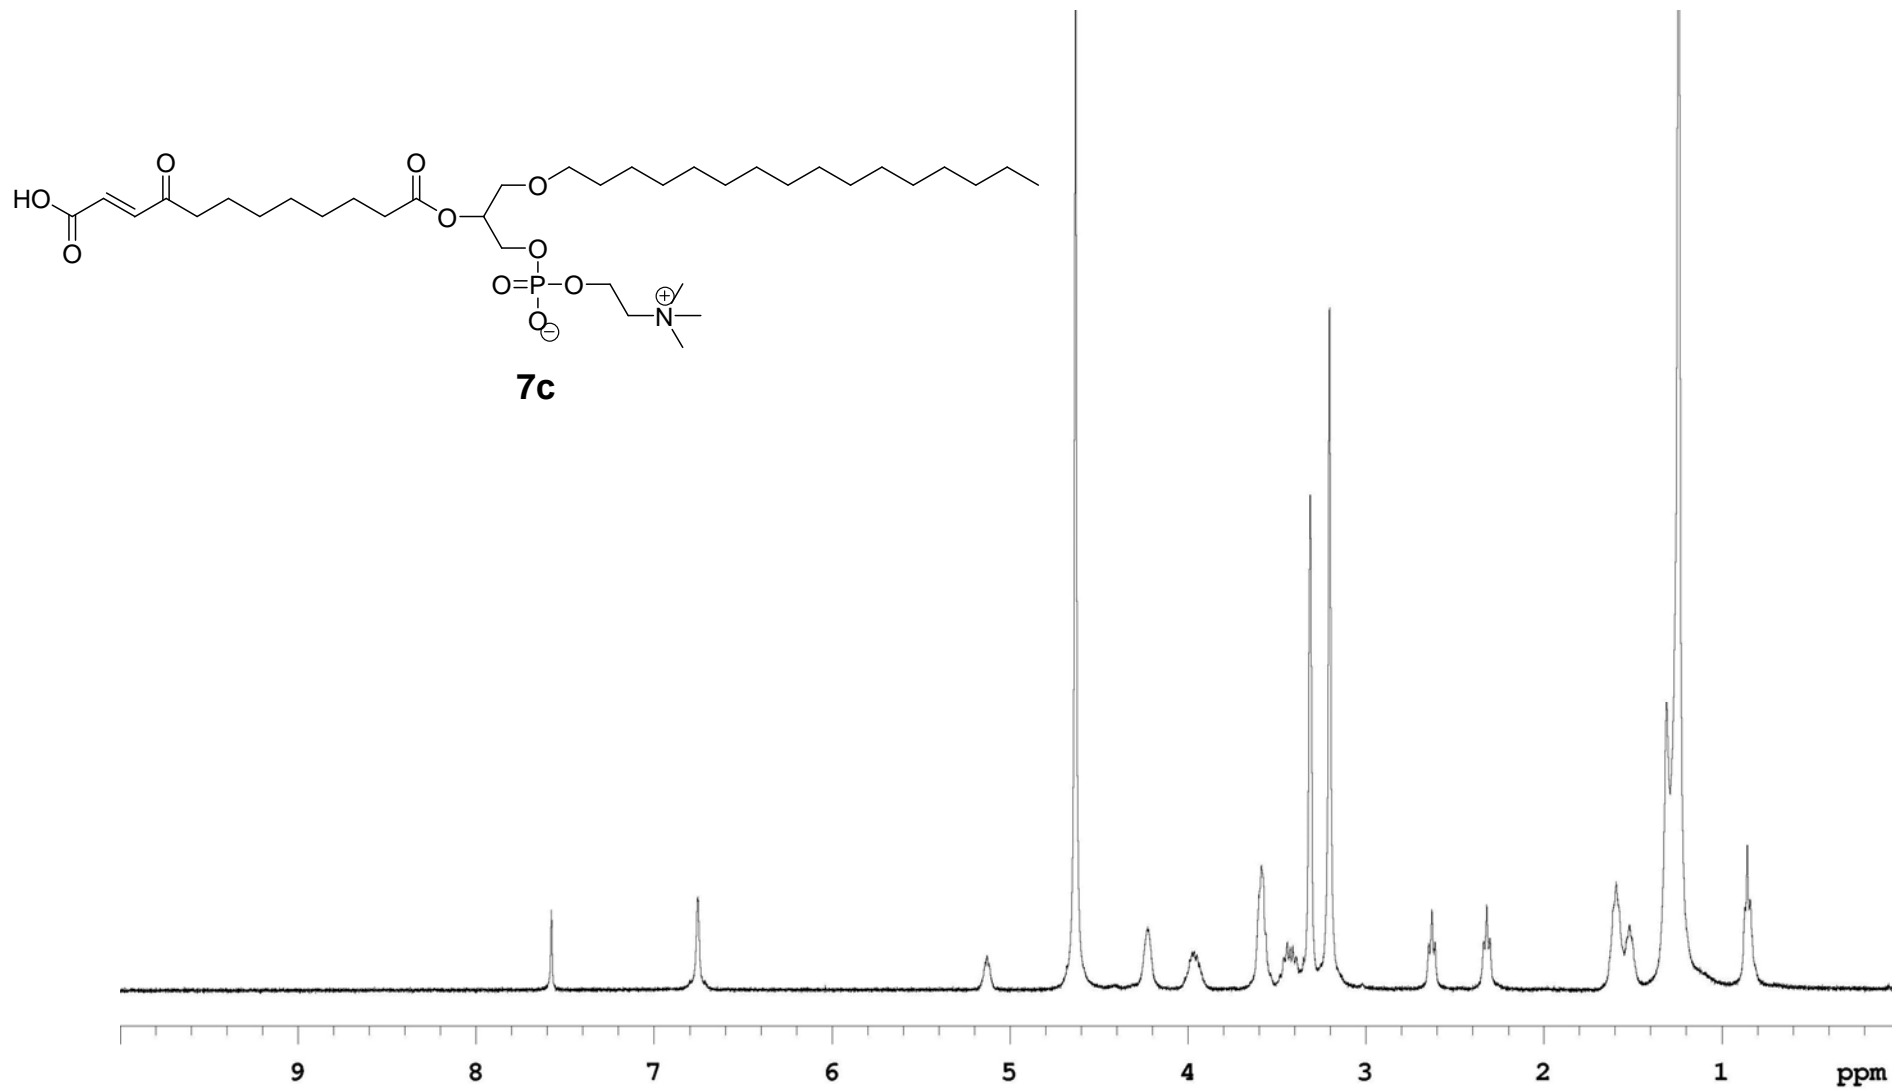

Figure S35. <sup>1</sup>H-NMR (400 M, CDCl<sub>3</sub>+CD<sub>3</sub>OD) of KDdiA-PAF (7c).

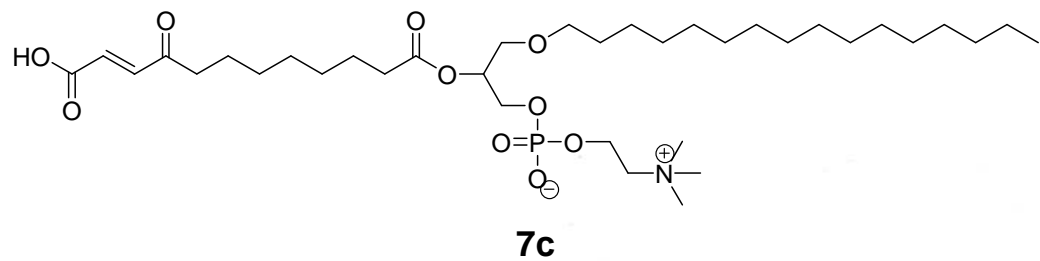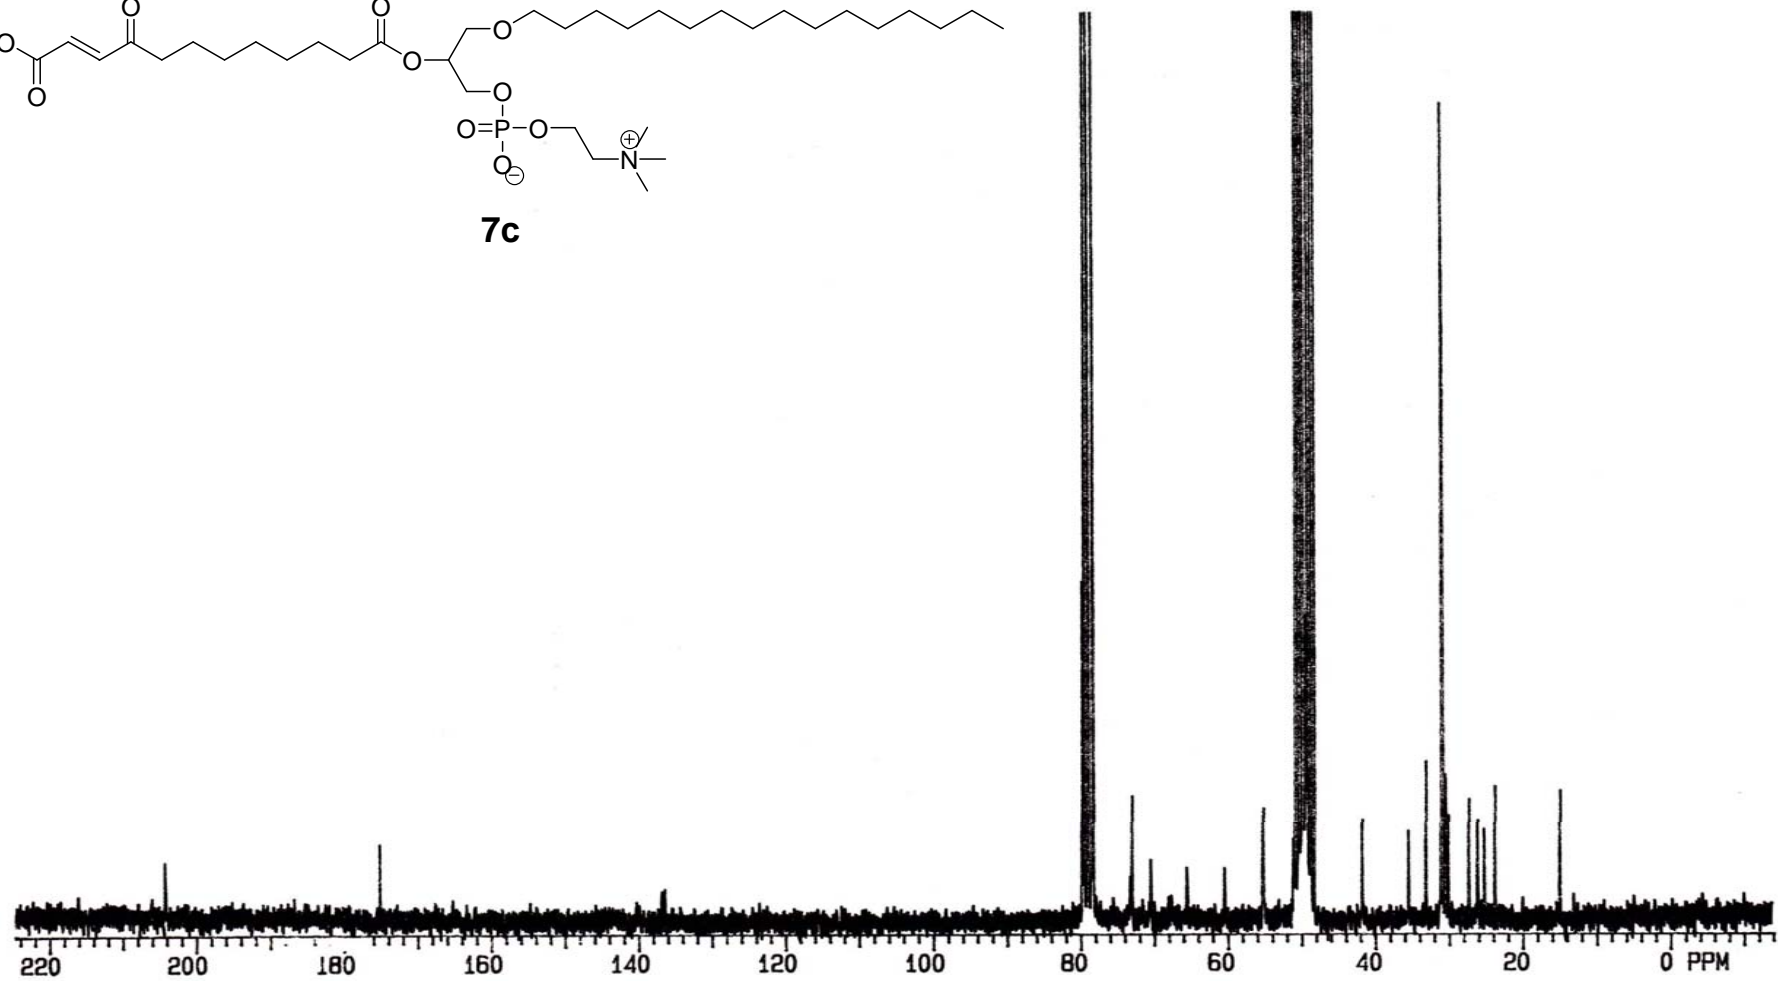

Figure S36.  $^{13}\text{C}$ -NMR (50 M,  $\text{CDCl}_3+\text{CD}_3\text{OD}$ ) of KDdiA-PAF (7c).



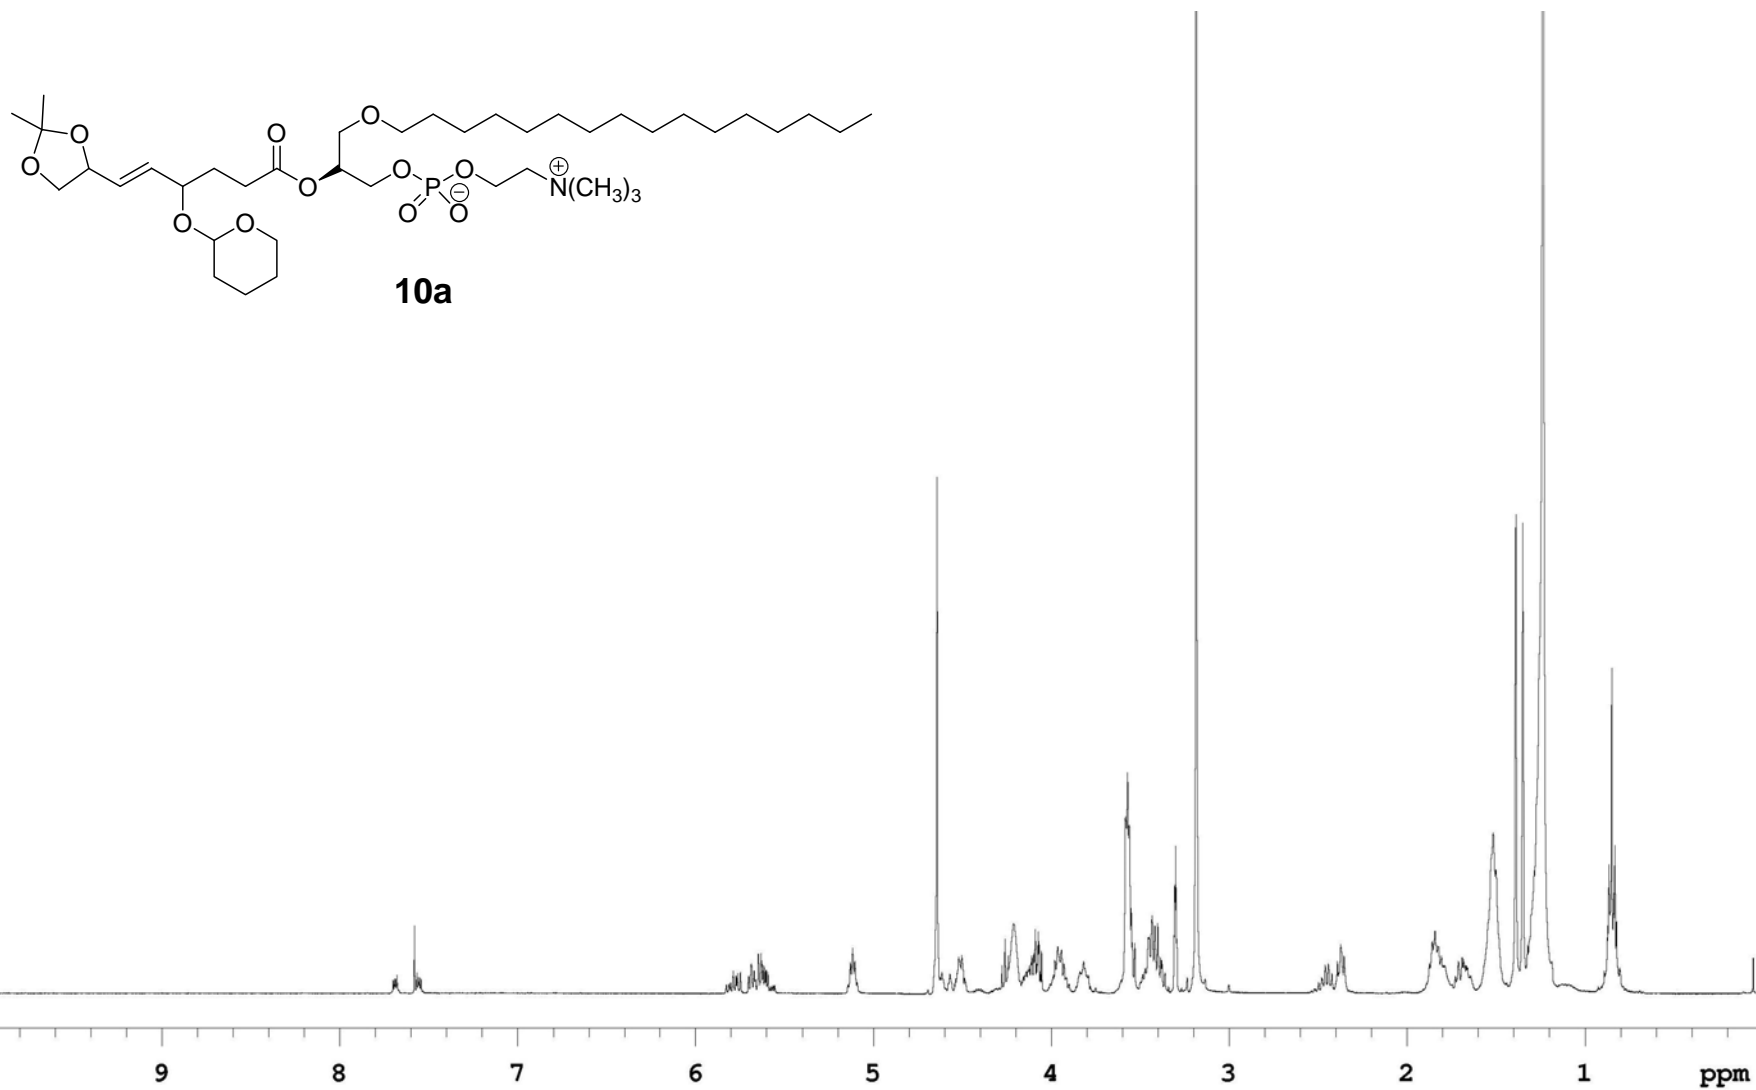

Figure S37. <sup>1</sup>H-NMR (400 M, CDCl<sub>3</sub>+CD<sub>3</sub>OD) of 1-O-Hexadecyl-2-[6-(2,2-dimethyl-1,3-dioxolan-4-yl)-4-(tetrahydro-2H-pyran-2-yloxy)hex-5-enoyl]-sn-glycero-3-phosphatidylcholine (10a).

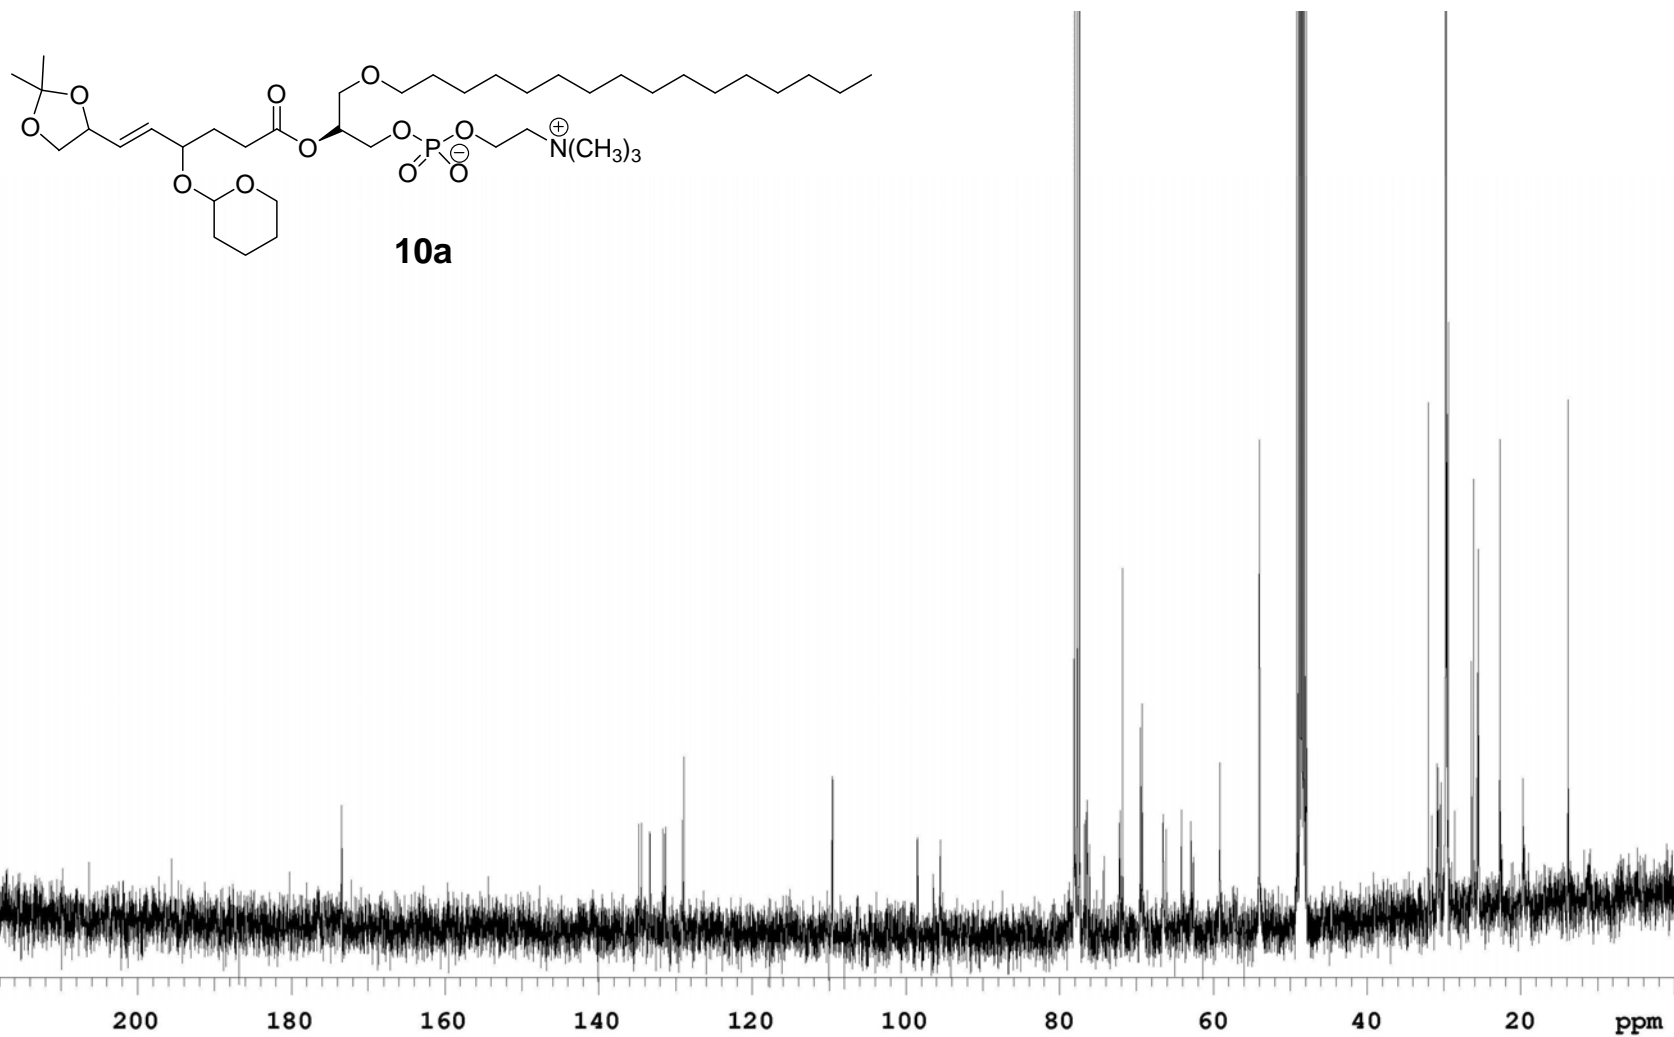

Figure S38. <sup>13</sup>C-NMR (100 M, CDCl<sub>3</sub>+CD<sub>3</sub>OD) of 1-O-Hexadecyl-2-[6-(2, 2-dimethyl-1, 3-dioxolan-4-yl)-4-(tetrahydro-2H-pyran-2-yloxy)hex-5-enoyl]-sn-glycero-3-phosphatidylcholine (10a).

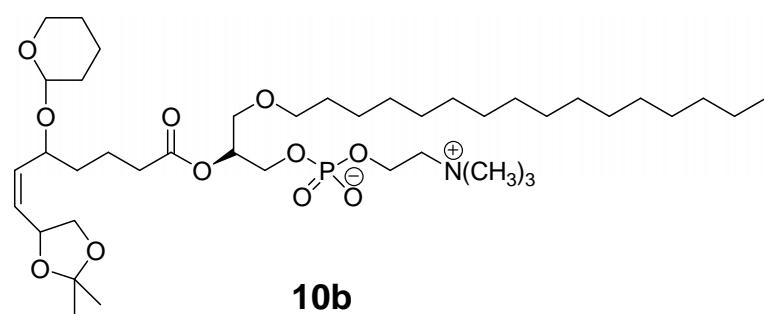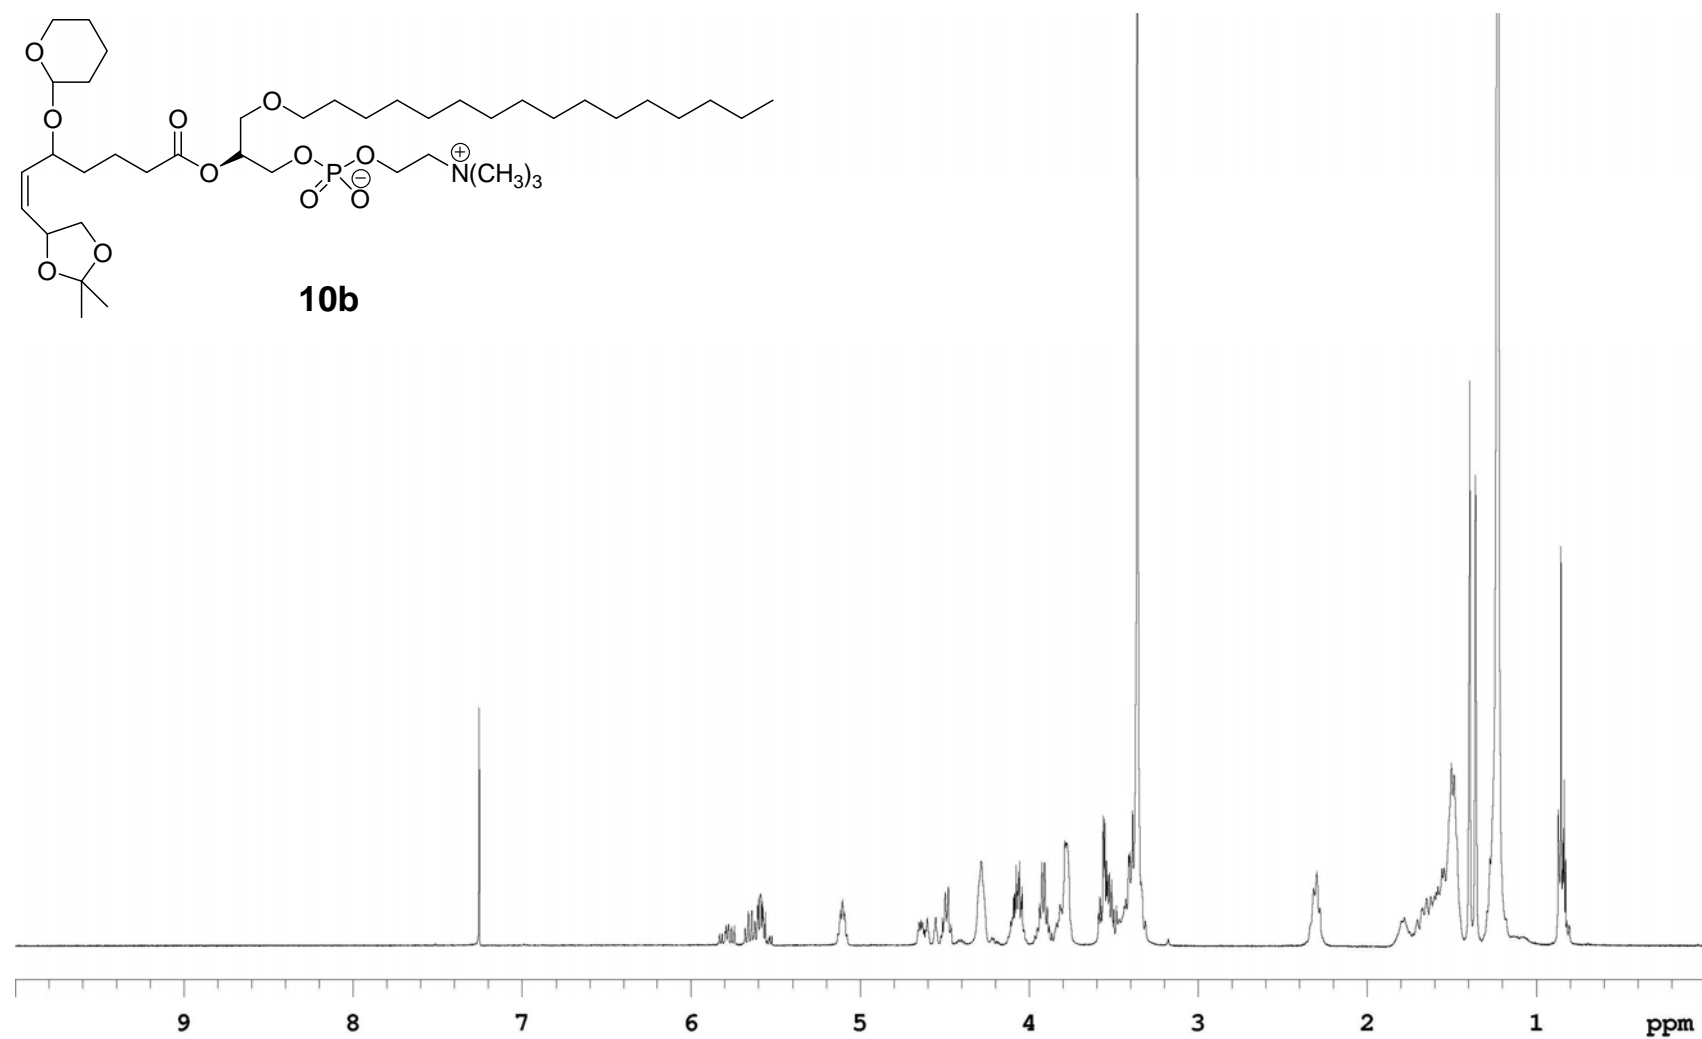

Figure S39.  $^1\text{H-NMR}$  (400 M,  $\text{CDCl}_3+\text{CD}_3\text{OD}$ ) of 1-O-Hexadecyl-2-[7-(2, 2-dimethyl-1, 3-dioxolan-4-yl)-5-(tetrahydro-2H-pyran-2-yloxy)hept-6-enoyl]-sn-glycero-3-phosphatidylcholine (10b).

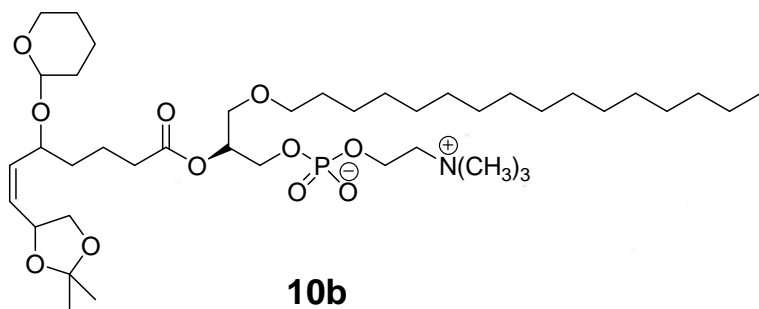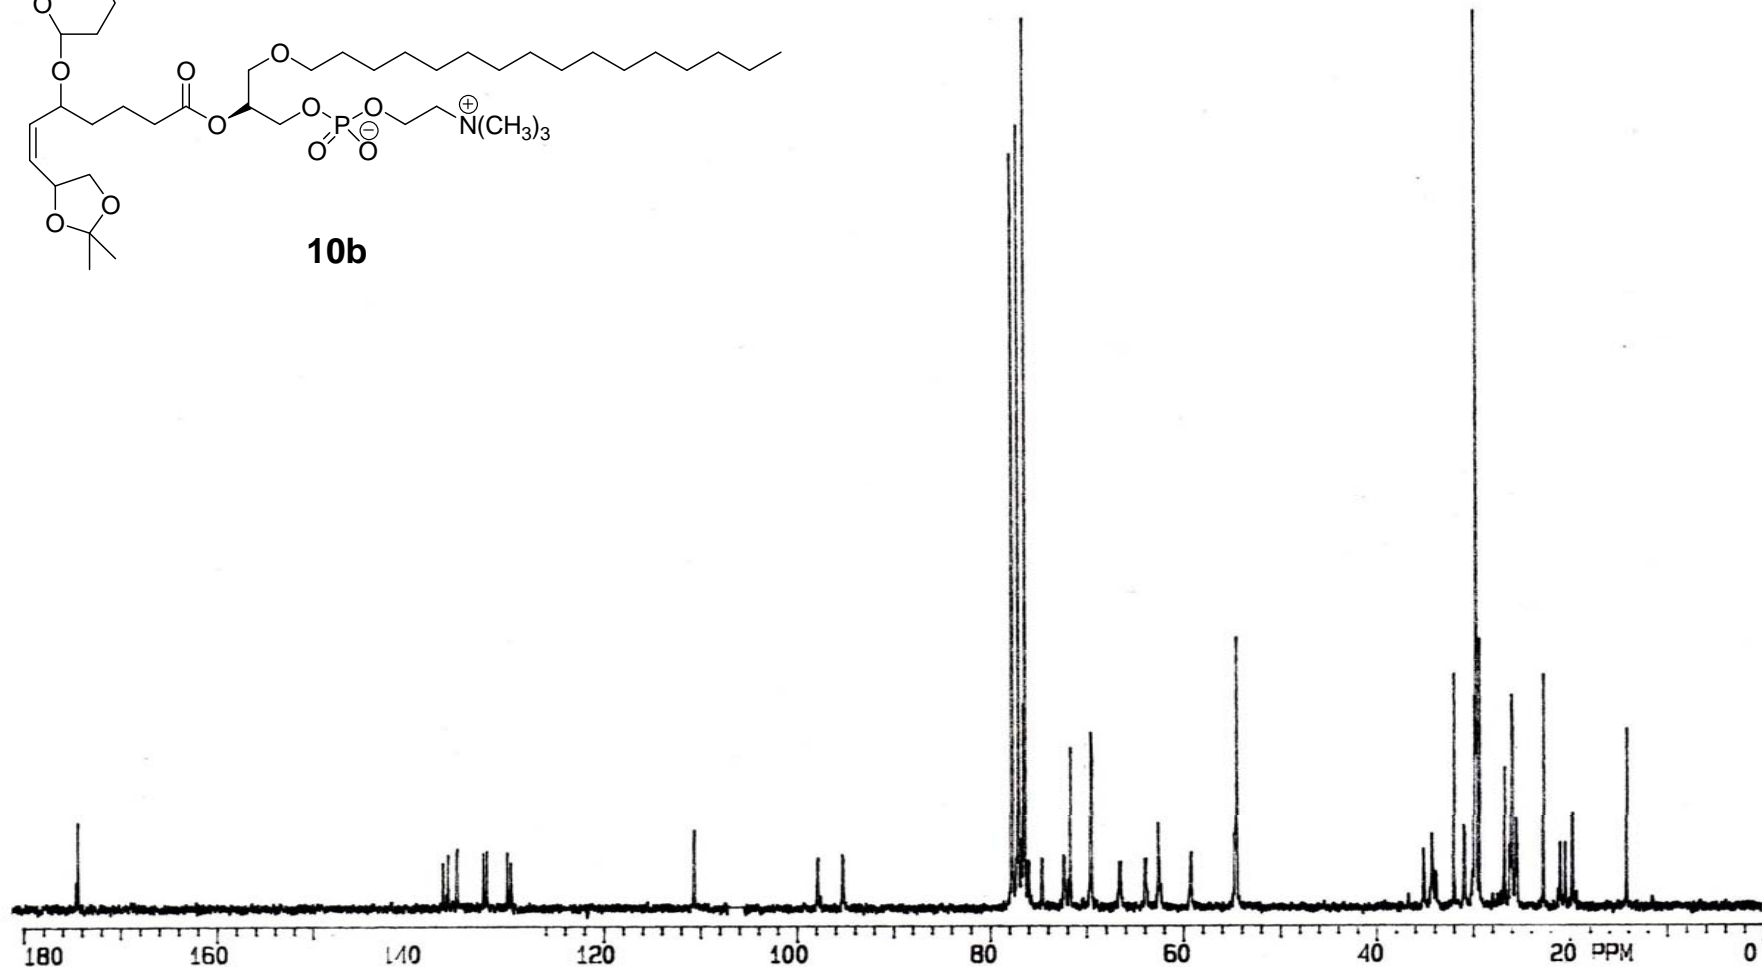

Figure S40. <sup>13</sup>C-NMR (50 M, CDCl<sub>3</sub>) of 1-O-Hexadecyl-2-[7-(2, 2-dimethyl-1, 3-dioxolan-4-yl)-5-(tetrahydro-2H-pyran-2-yloxy)hept-6-enoyl]-sn-glycero-3-phosphatidylcholine (10b).

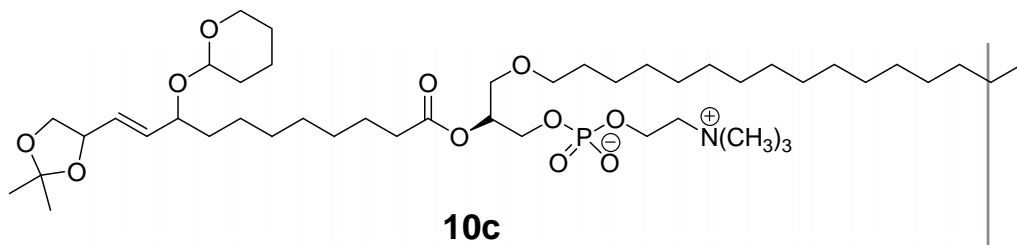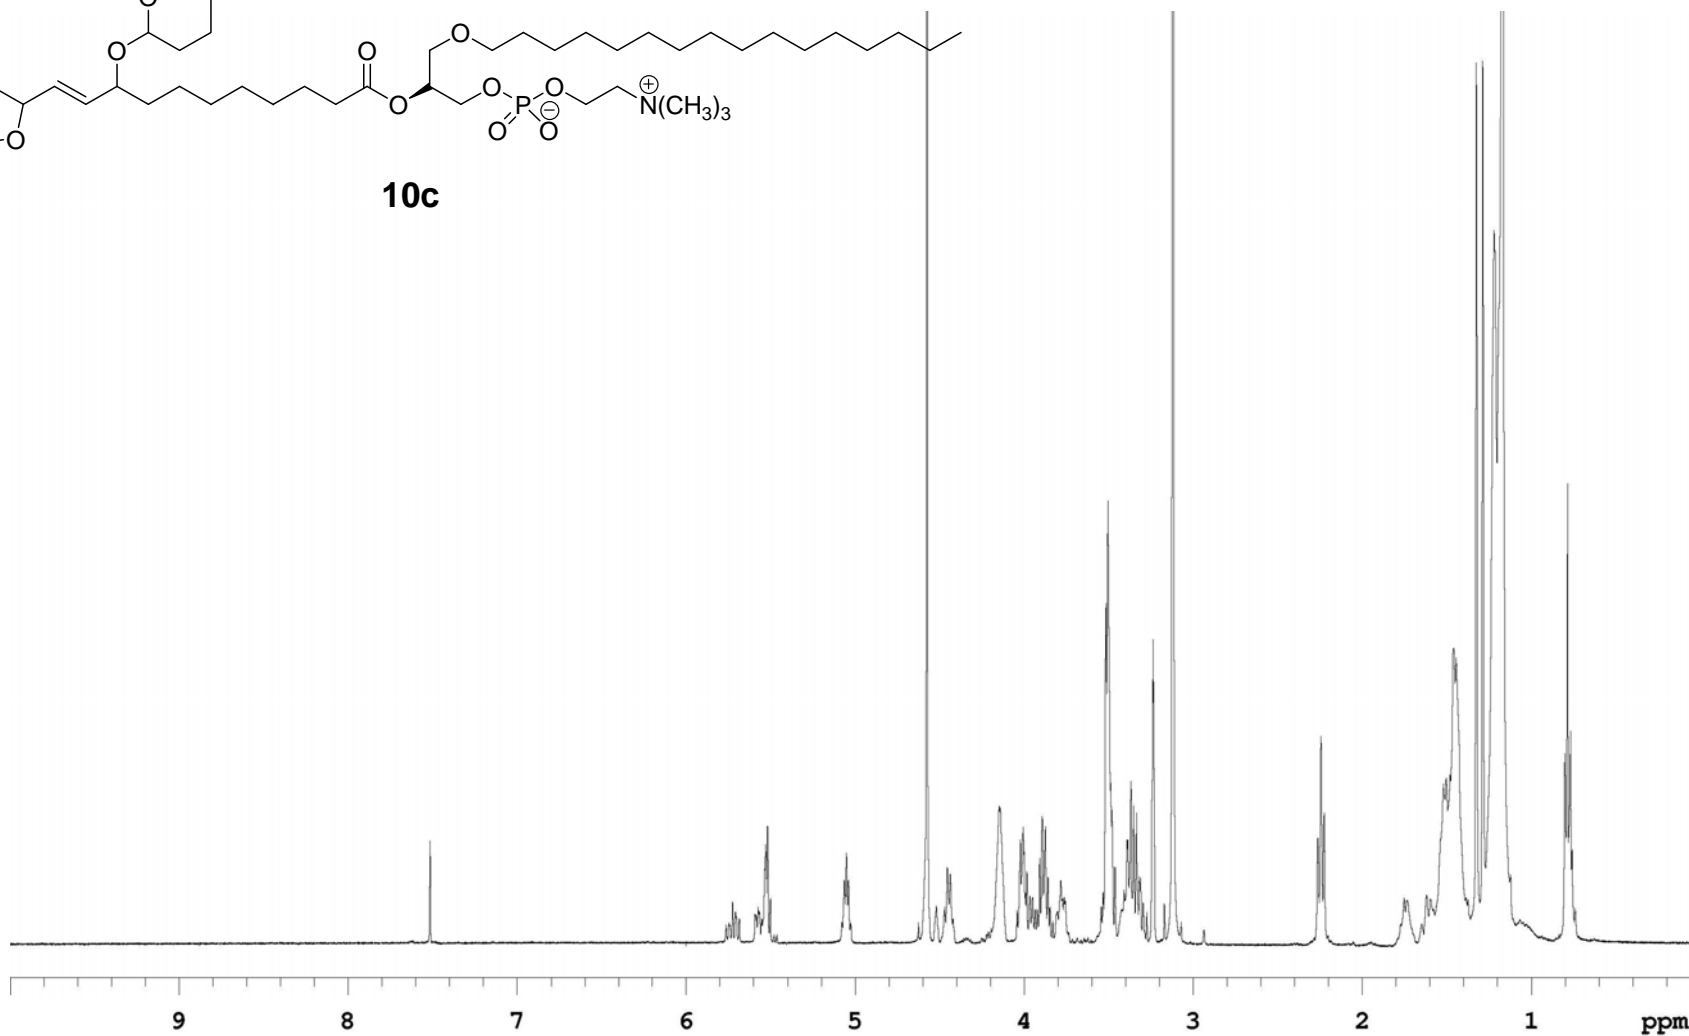

Figure S41. <sup>1</sup>H-NMR (400 M, CDCl<sub>3</sub>+CD<sub>3</sub>OD) of 1-O-Hexadecyl-2-[11-(2, 2-dimethyl-1, 3-dioxolan-4-yl)-9-(tetrahydro-2H-pyran-2-yloxy)-undec-10-enoyl]-sn-glycero-3-phosphatidylcholine (10c).

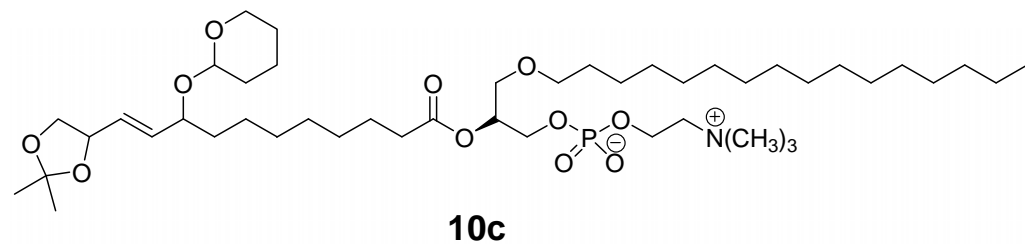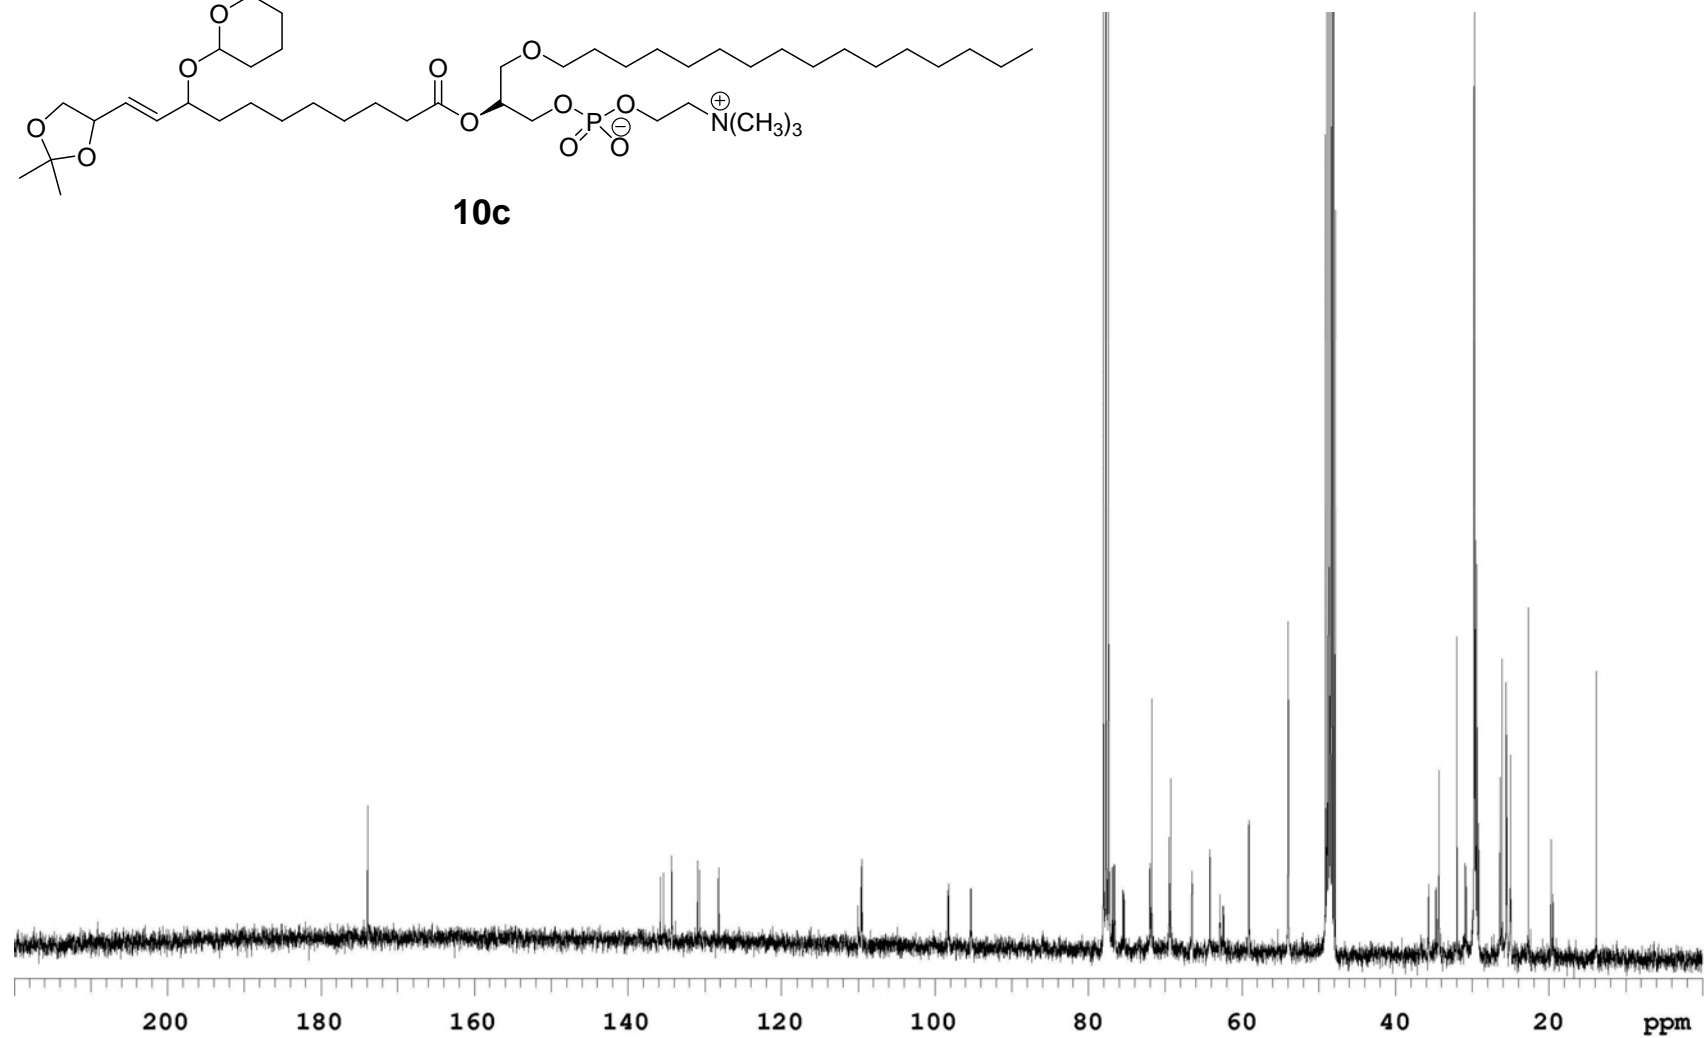

Figure S42.  $^{13}\text{C}$ -NMR (100 M,  $\text{CDCl}_3 + \text{CD}_3\text{OD}$ ) of 1-O-Hexadecyl-2-[11-(2, 2-dimethyl-1, 3-dioxolan-4-yl)-9-(tetrahydro-2H-pyran-2-yloxy)-undec-10-enoyl]-sn-glycero-3-phosphatidylcholine (10c).

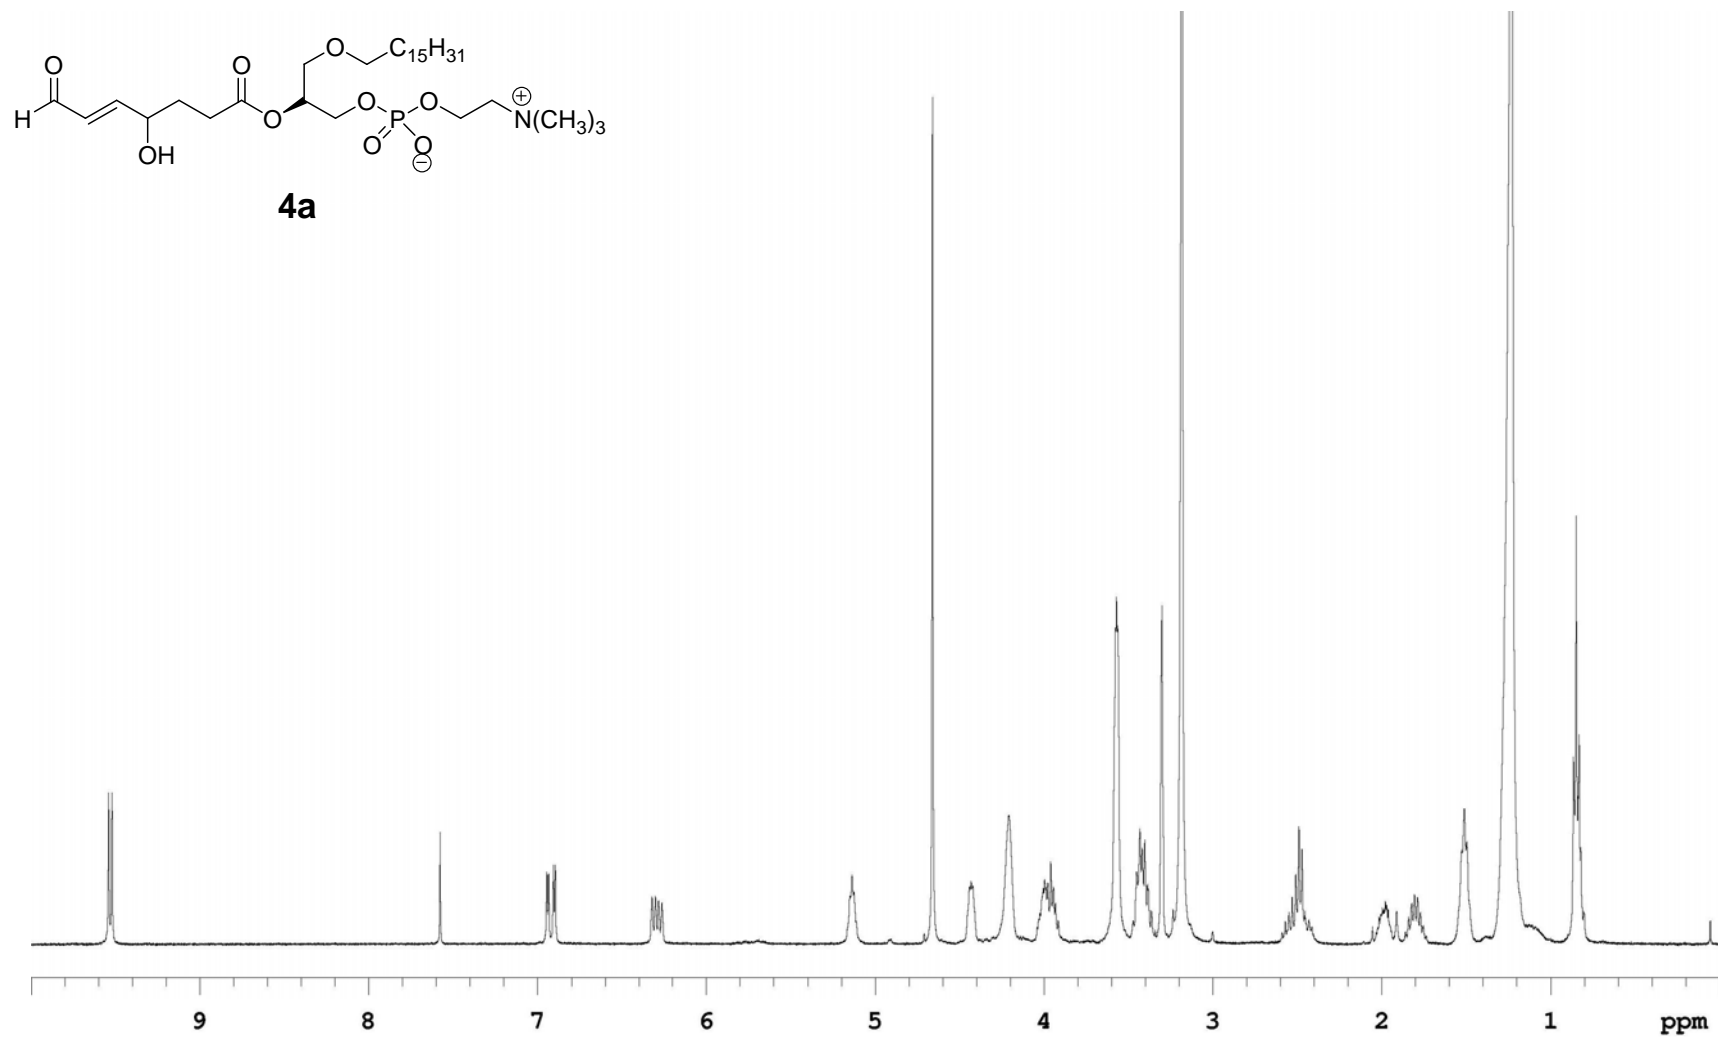

Figure S43. <sup>1</sup>H-NMR (400 M, CDCl<sub>3</sub>+CD<sub>3</sub>OD) of HOHA-PAF (4a).

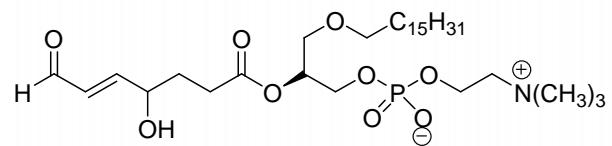

**4a**

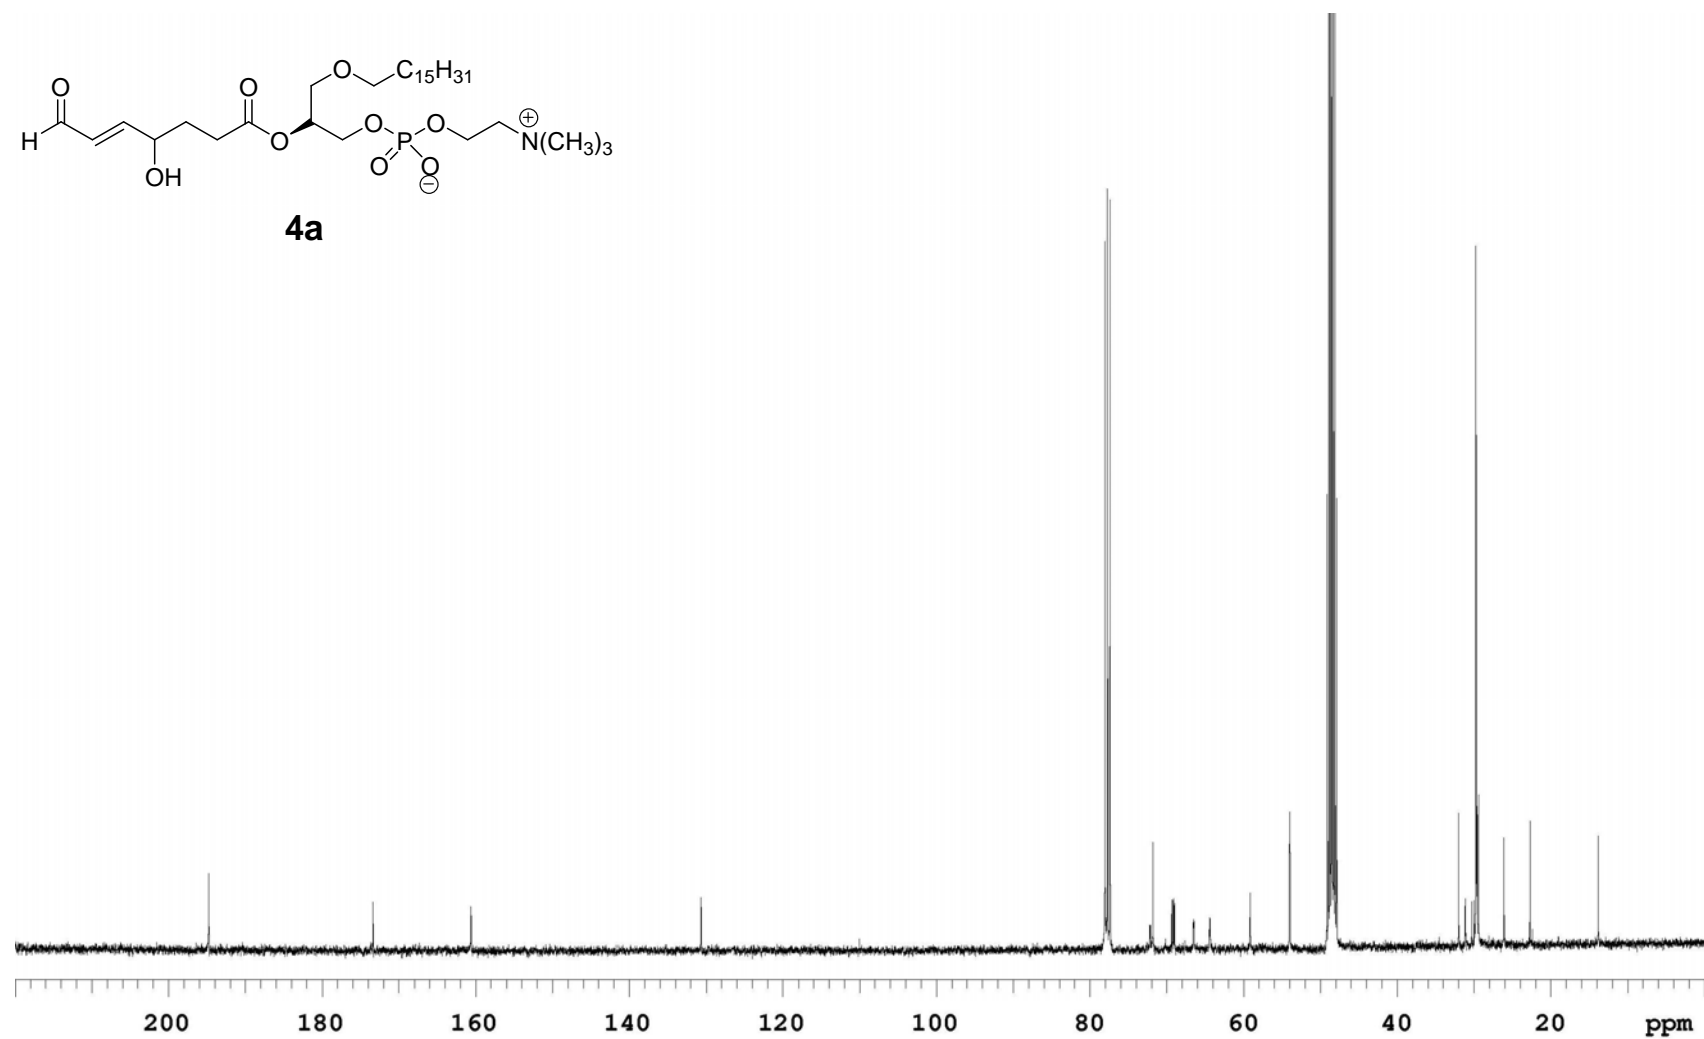

**Figure S44.** <sup>13</sup>C-NMR (100 M, CDCl<sub>3</sub>+CD<sub>3</sub>OD) of HOHA-PAF (4a).



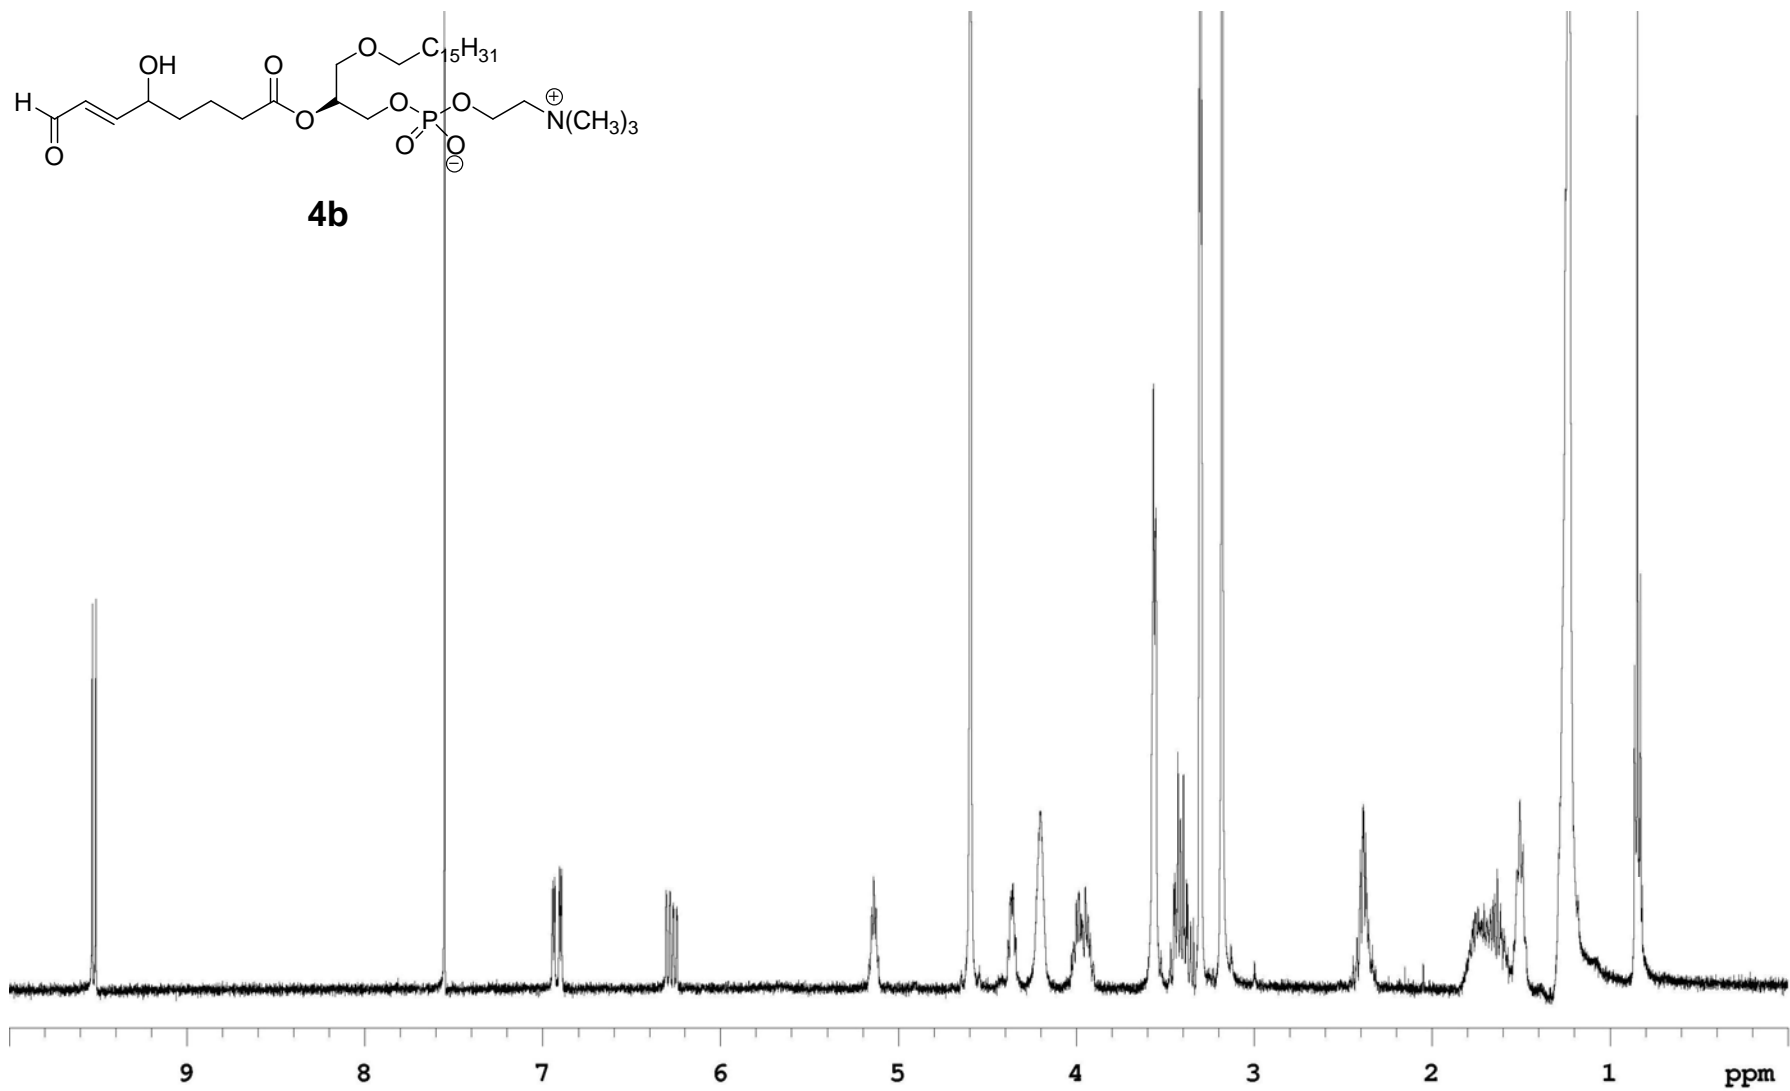

Figure S45. <sup>1</sup>H-NMR (400 M, CDCl<sub>3</sub>+CD<sub>3</sub>OD) of HOOA-PAF (4b).

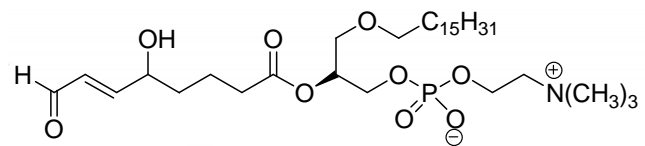

**4b**

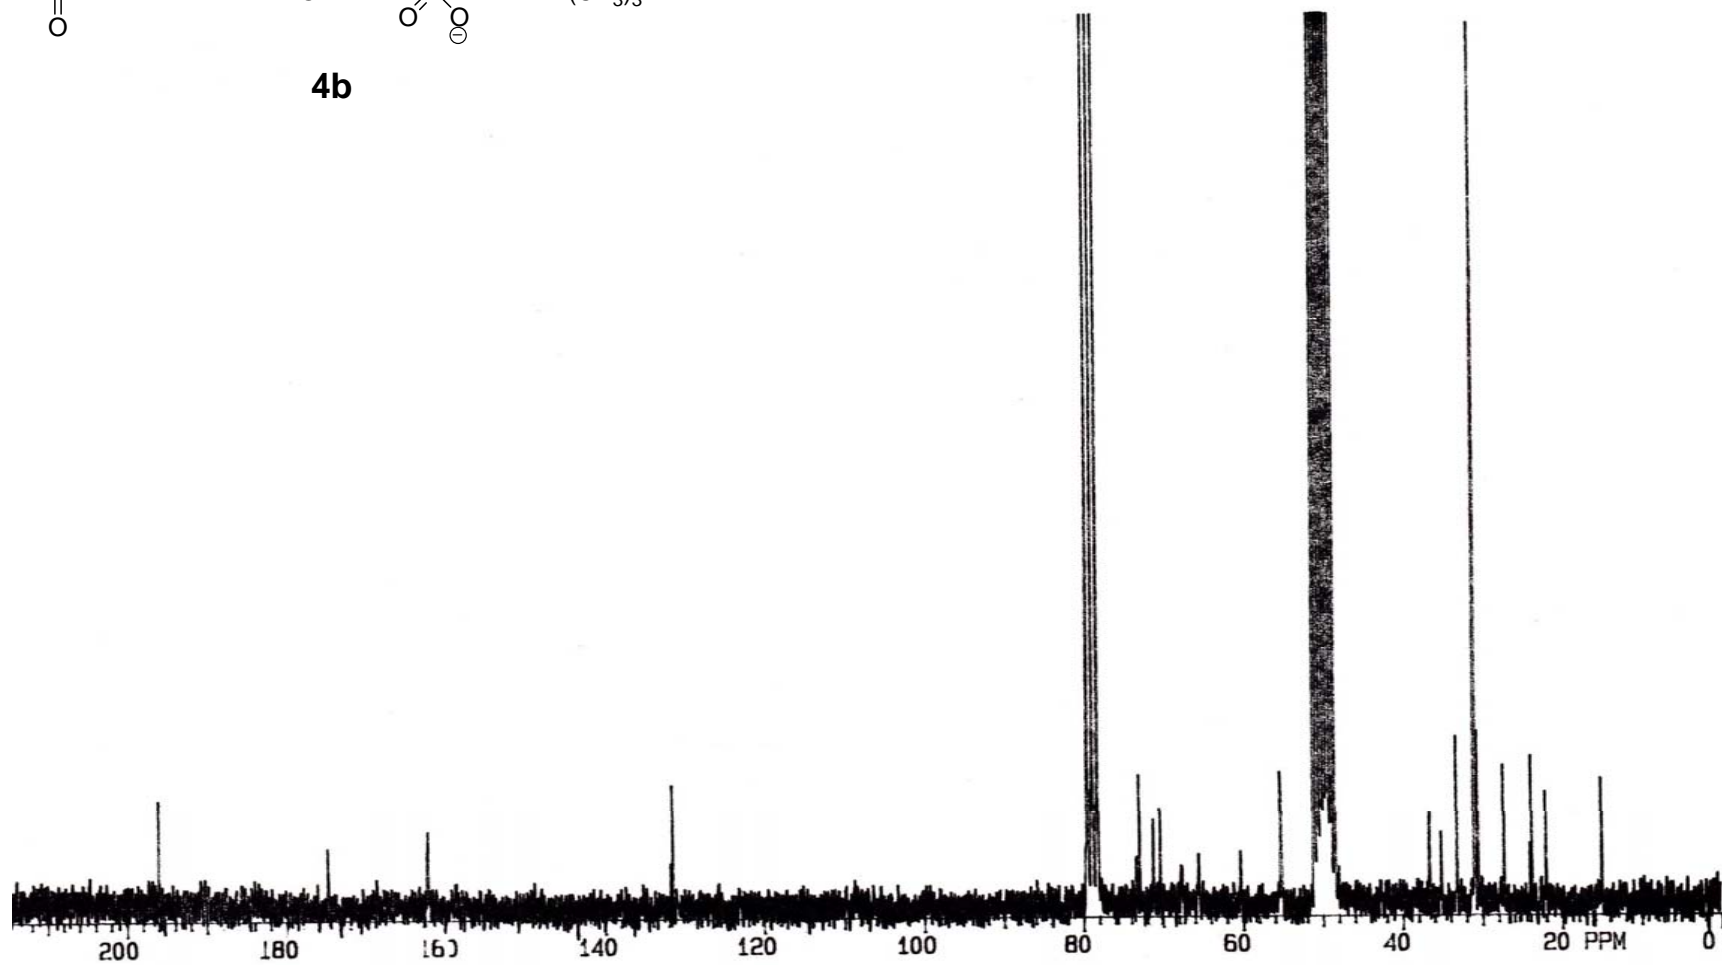

**Figure S46.** <sup>13</sup>C-NMR (50 M, CDCl<sub>3</sub>+CD<sub>3</sub>OD) of HOOA-PAF (4b).

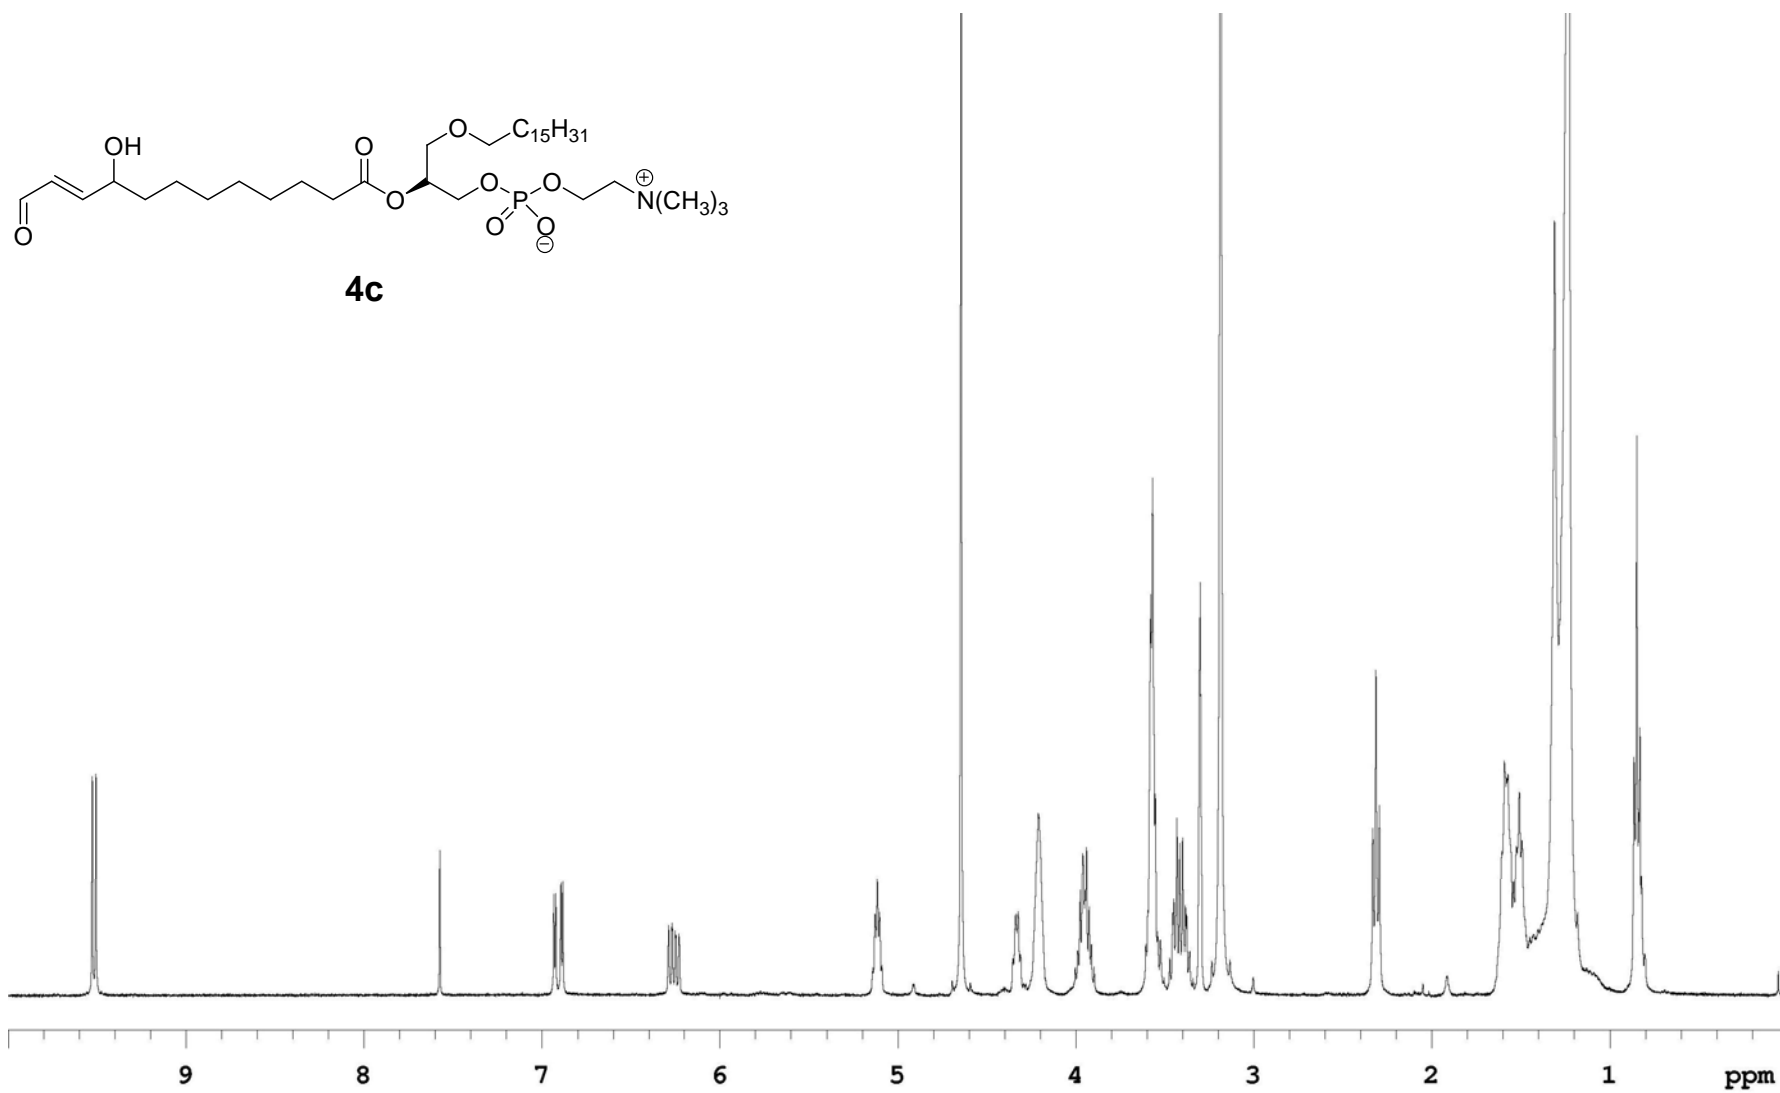

Figure S47. <sup>1</sup>H-NMR (400 M, CDCl<sub>3</sub>+CD<sub>3</sub>OD) of HODA-PAF (4c).

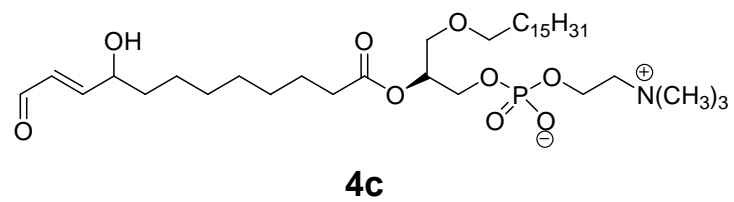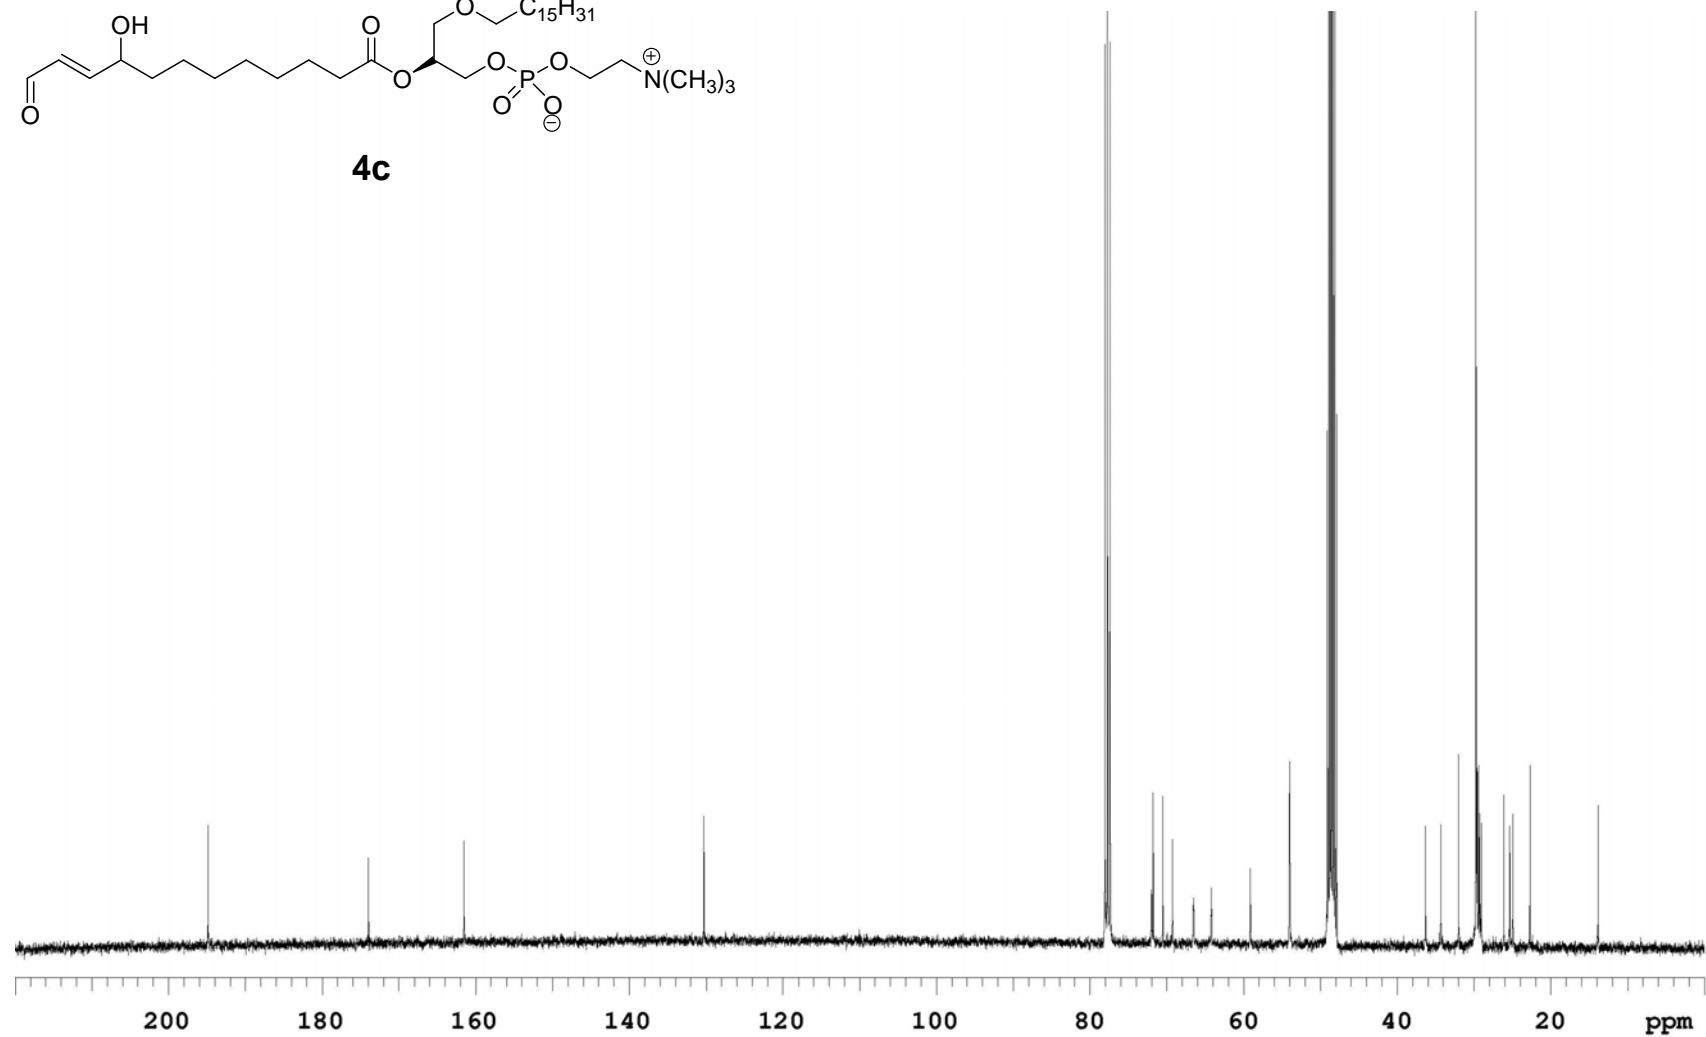

Figure S48.  $^{13}\text{C}$ -NMR (100 M,  $\text{CDCl}_3+\text{CD}_3\text{OD}$ ) of HODA-PAF (4c).

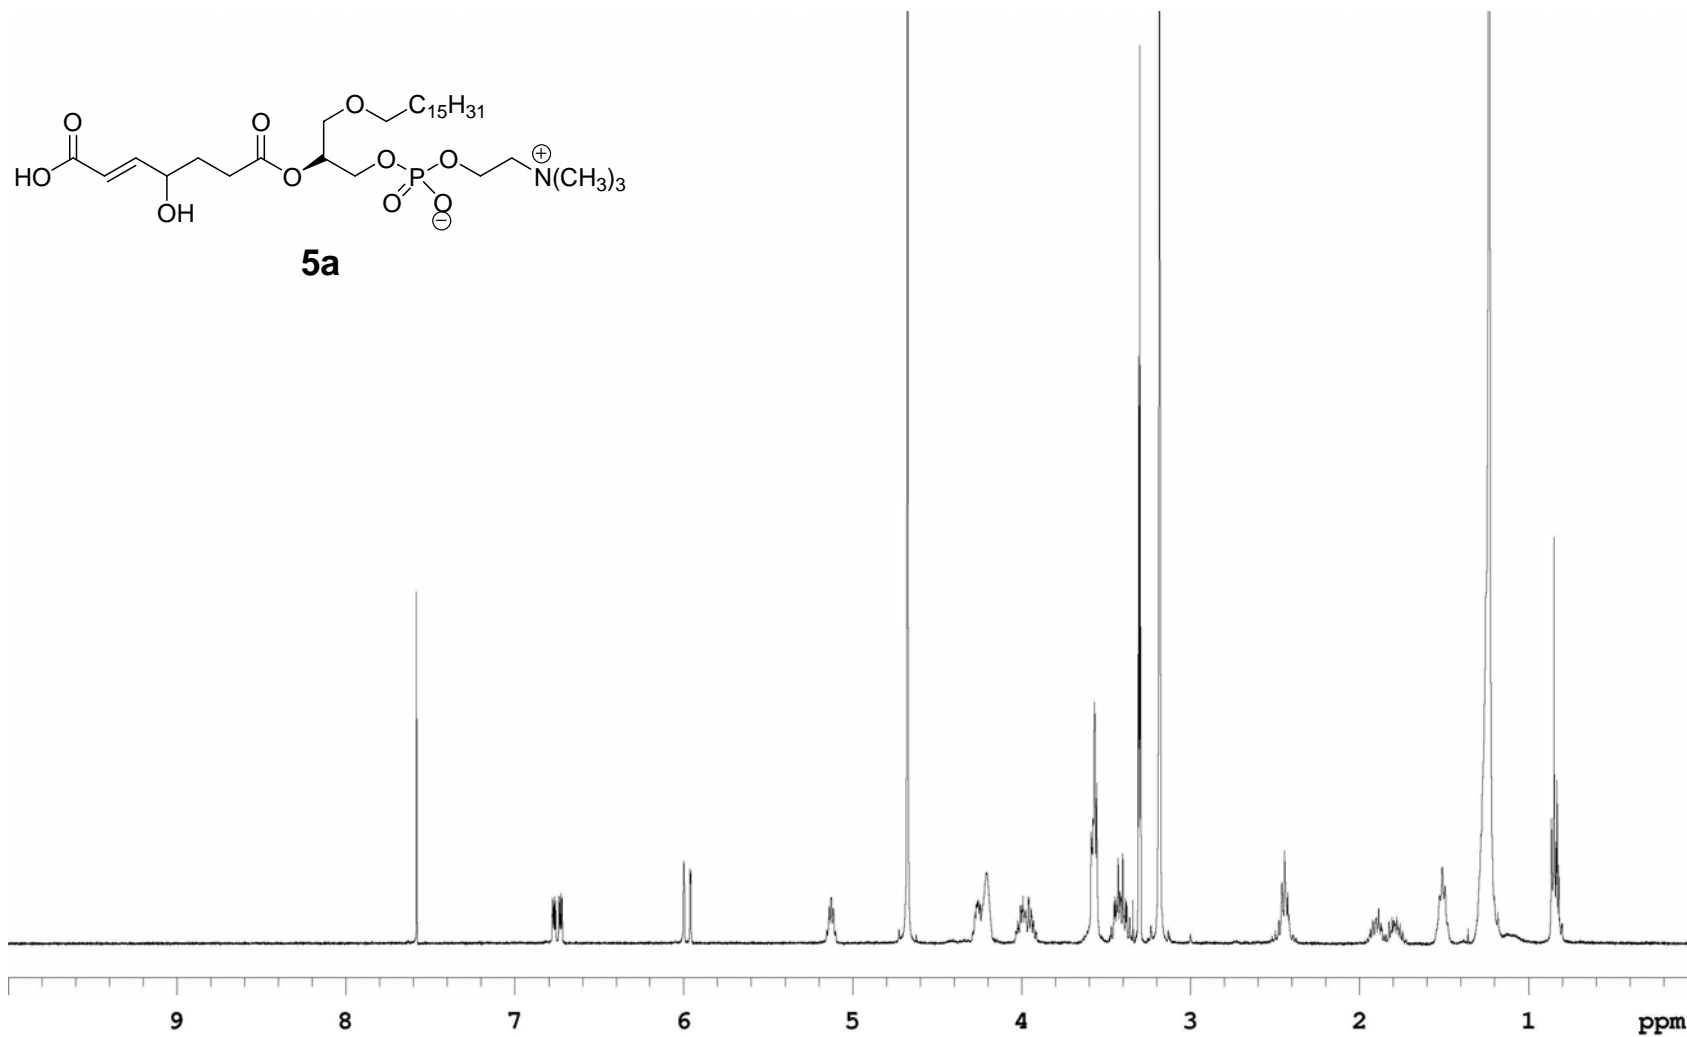

Figure S49. <sup>1</sup>H-NMR (400 M, CDCl<sub>3</sub>+CD<sub>3</sub>OD) of HHdiA-PAF (5a).

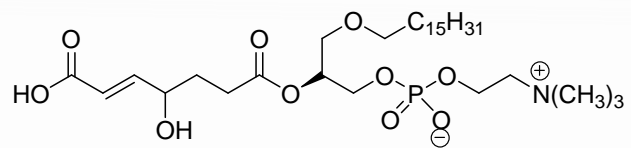

**5a**

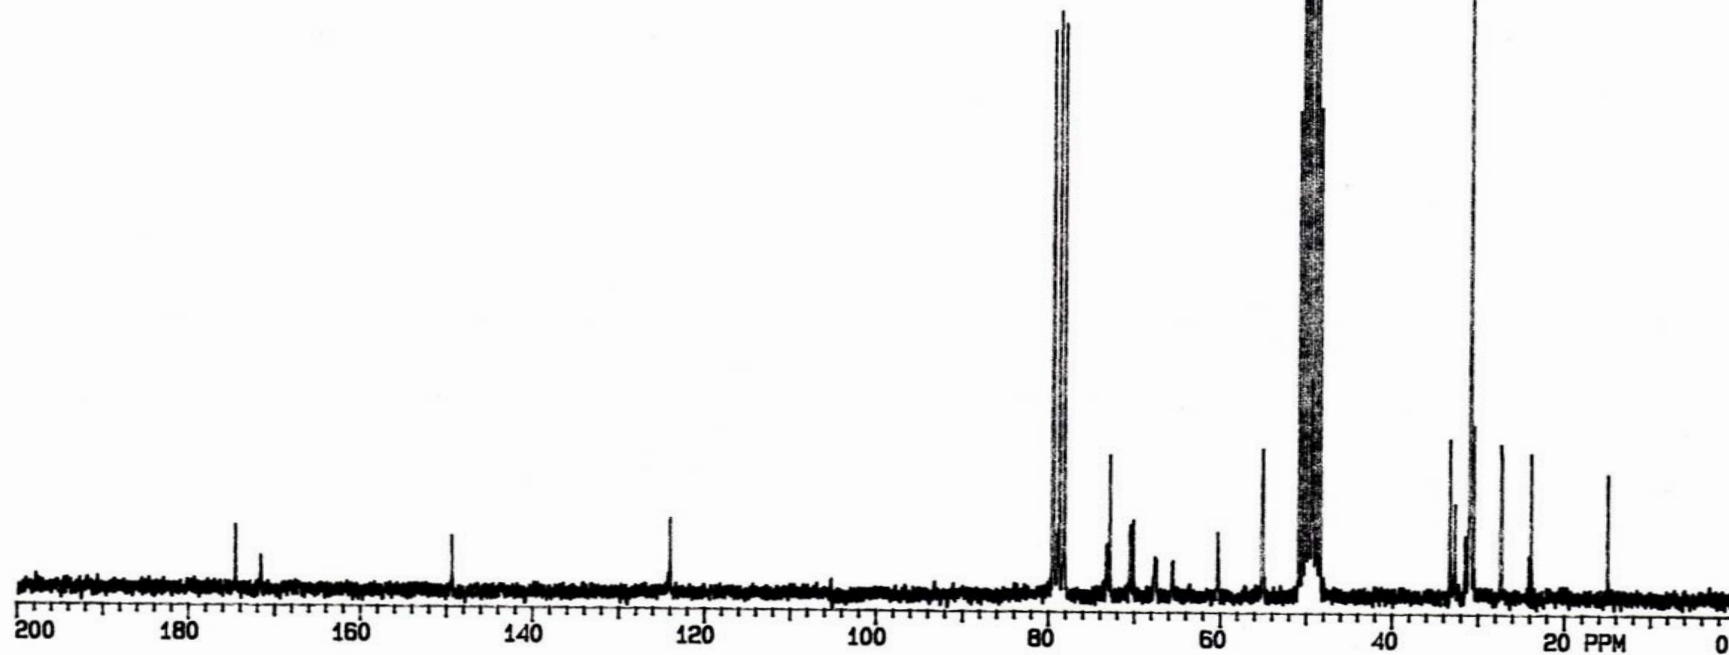

**Figure S50.** <sup>13</sup>C-NMR (50 M, CDCl<sub>3</sub>+CD<sub>3</sub>OD) of HHdiA-PAF (5a).

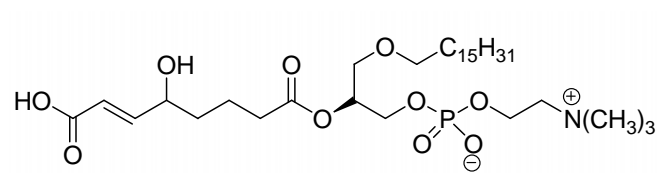

**5b**

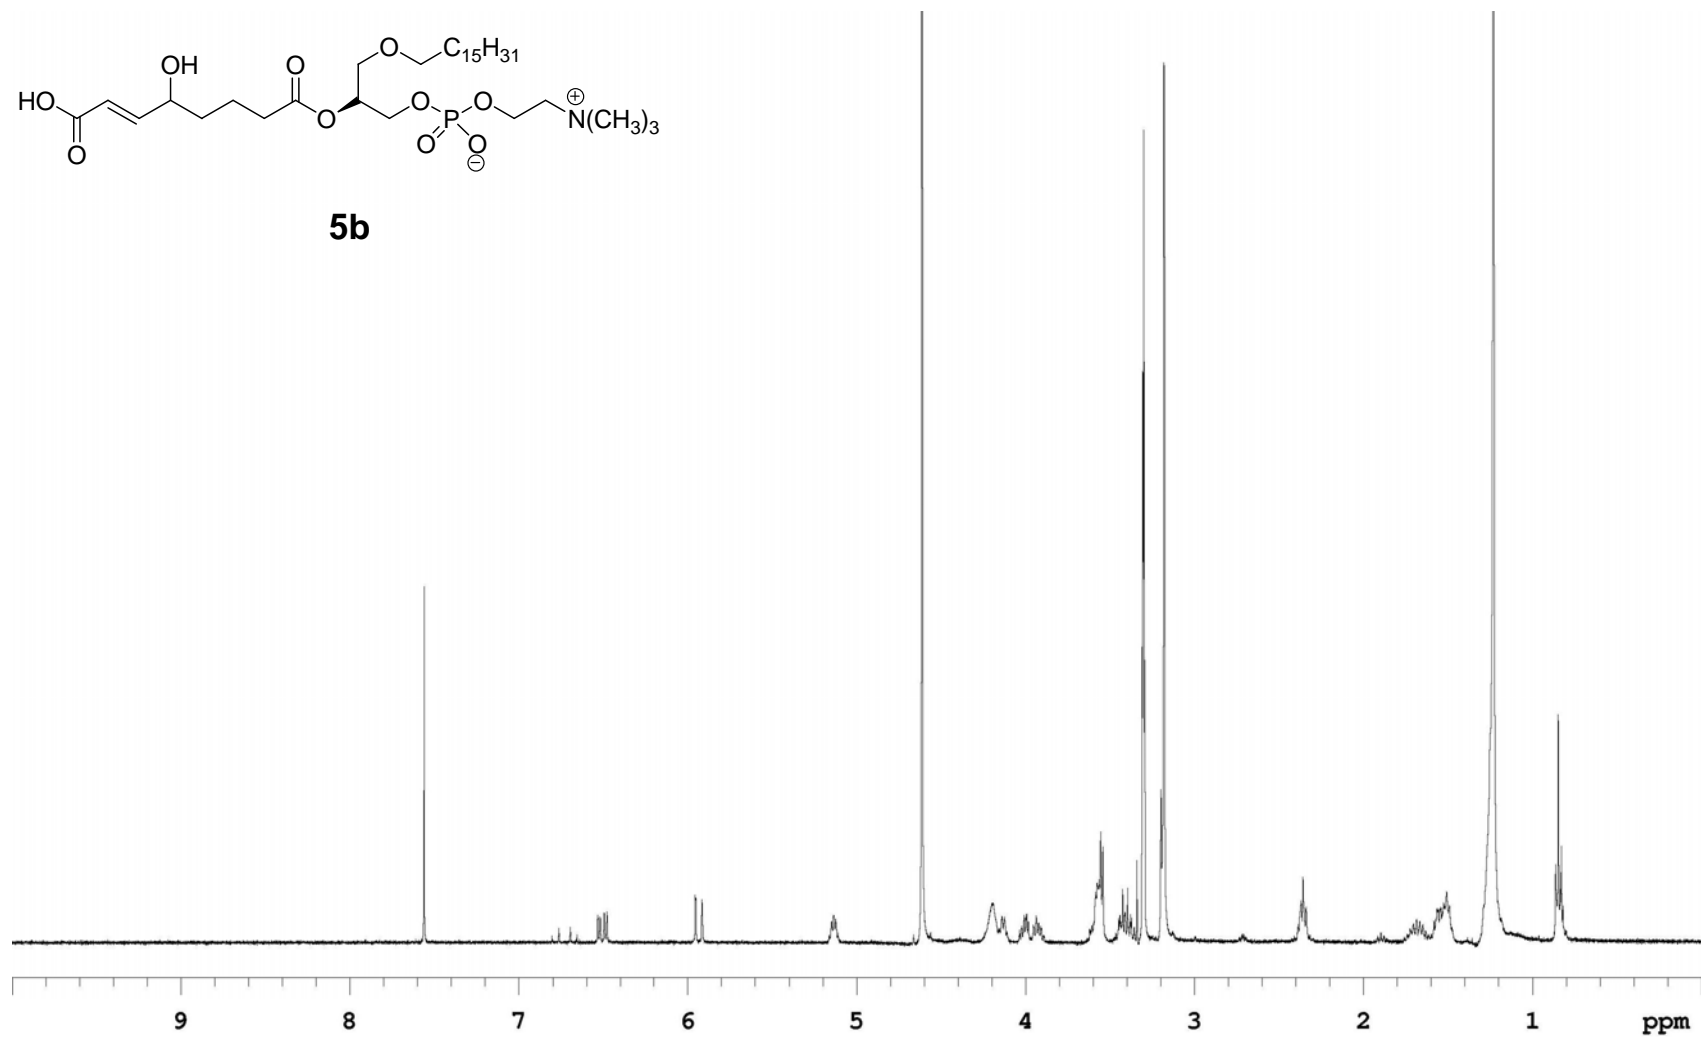

**Figure S51. <sup>1</sup>H-NMR (400 M, CDCl<sub>3</sub>+CD<sub>3</sub>OD) of HOdiA-PAF (5b).**

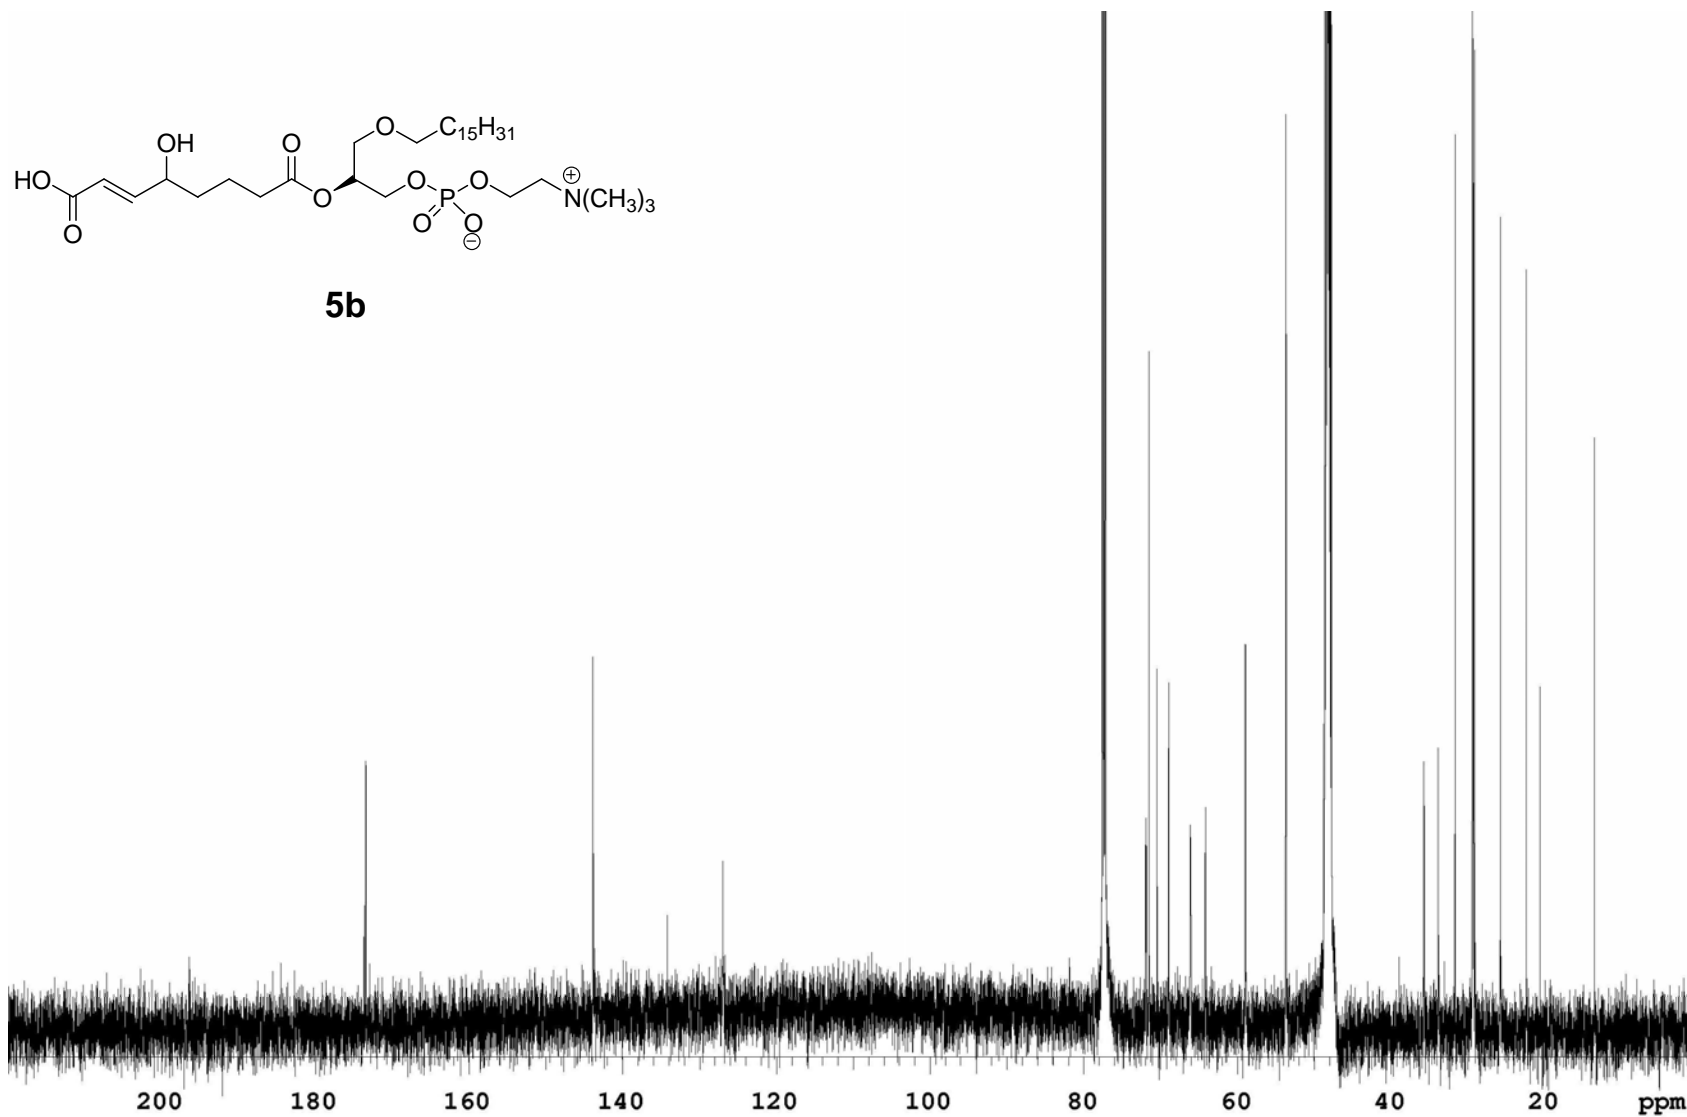

Figure S52. <sup>13</sup>C-NMR (100 M, CDCl<sub>3</sub>+CD<sub>3</sub>OD) of HOdiA-PAF (5b).



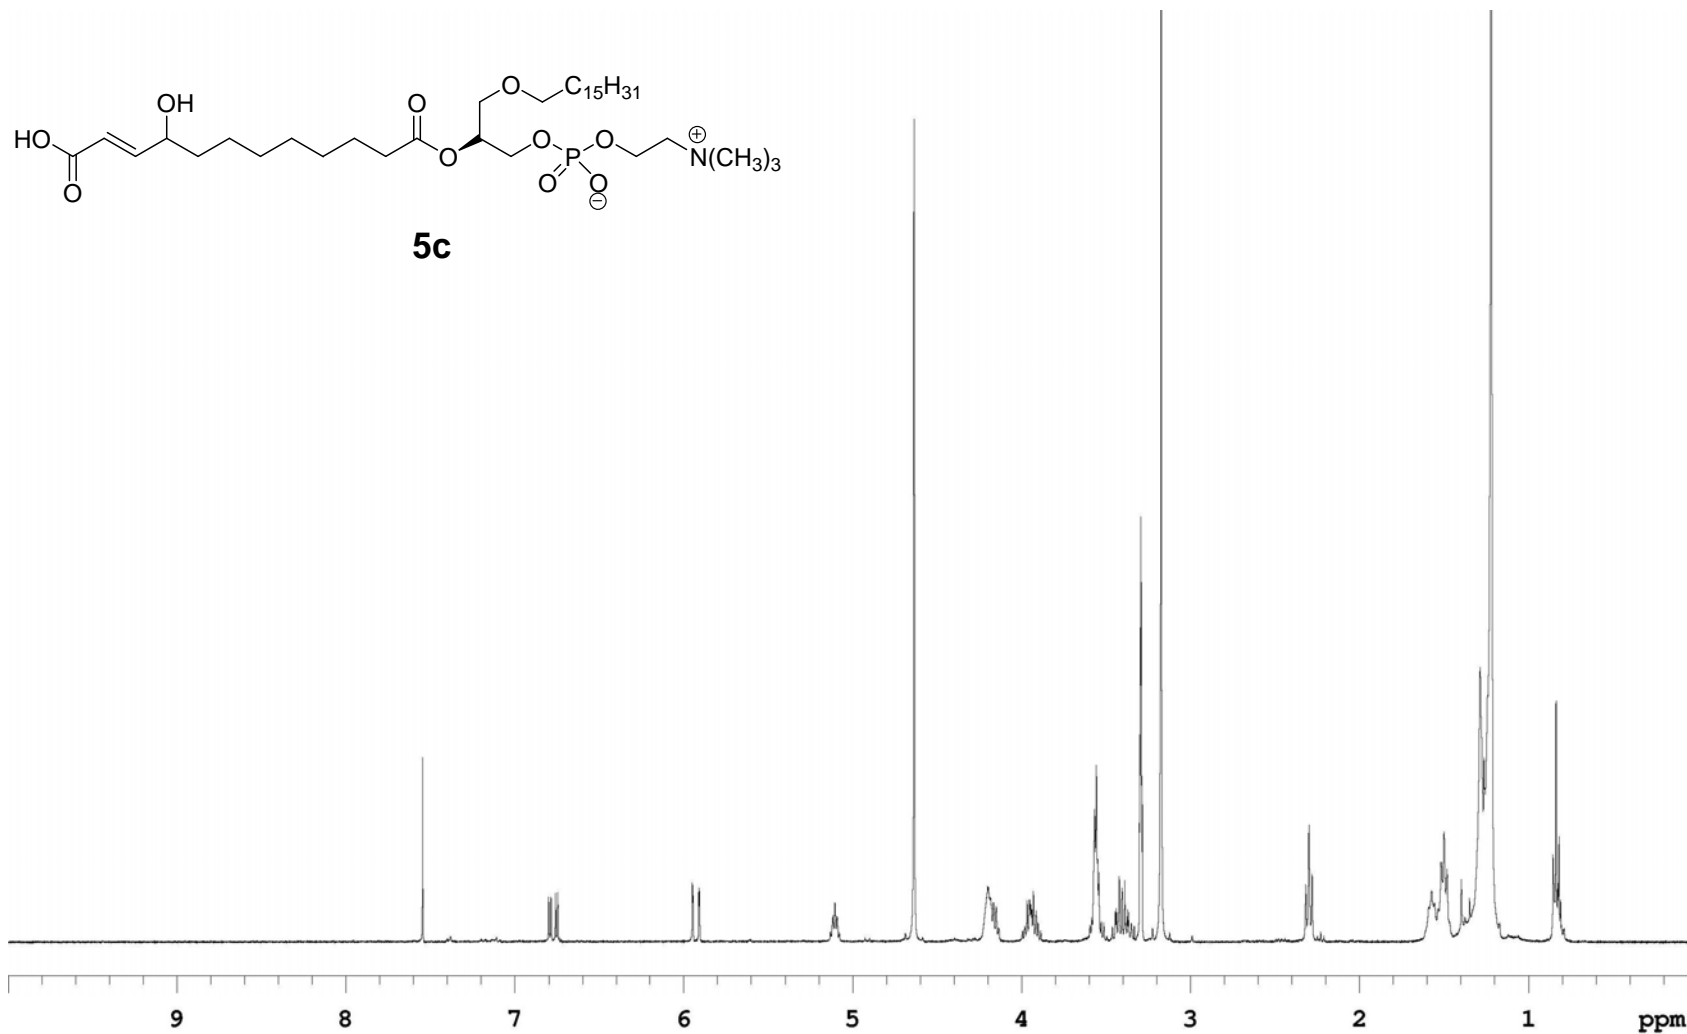

Figure S53. <sup>1</sup>H-NMR (400 M, CDCl<sub>3</sub>+CD<sub>3</sub>OD) of HDdiA-PAF (5c).

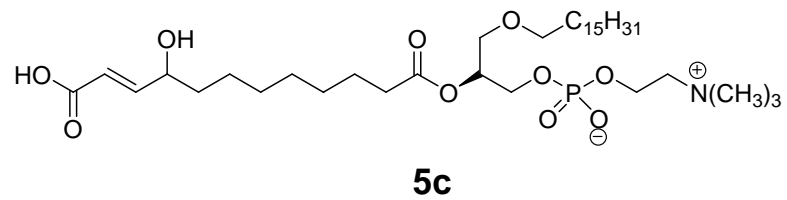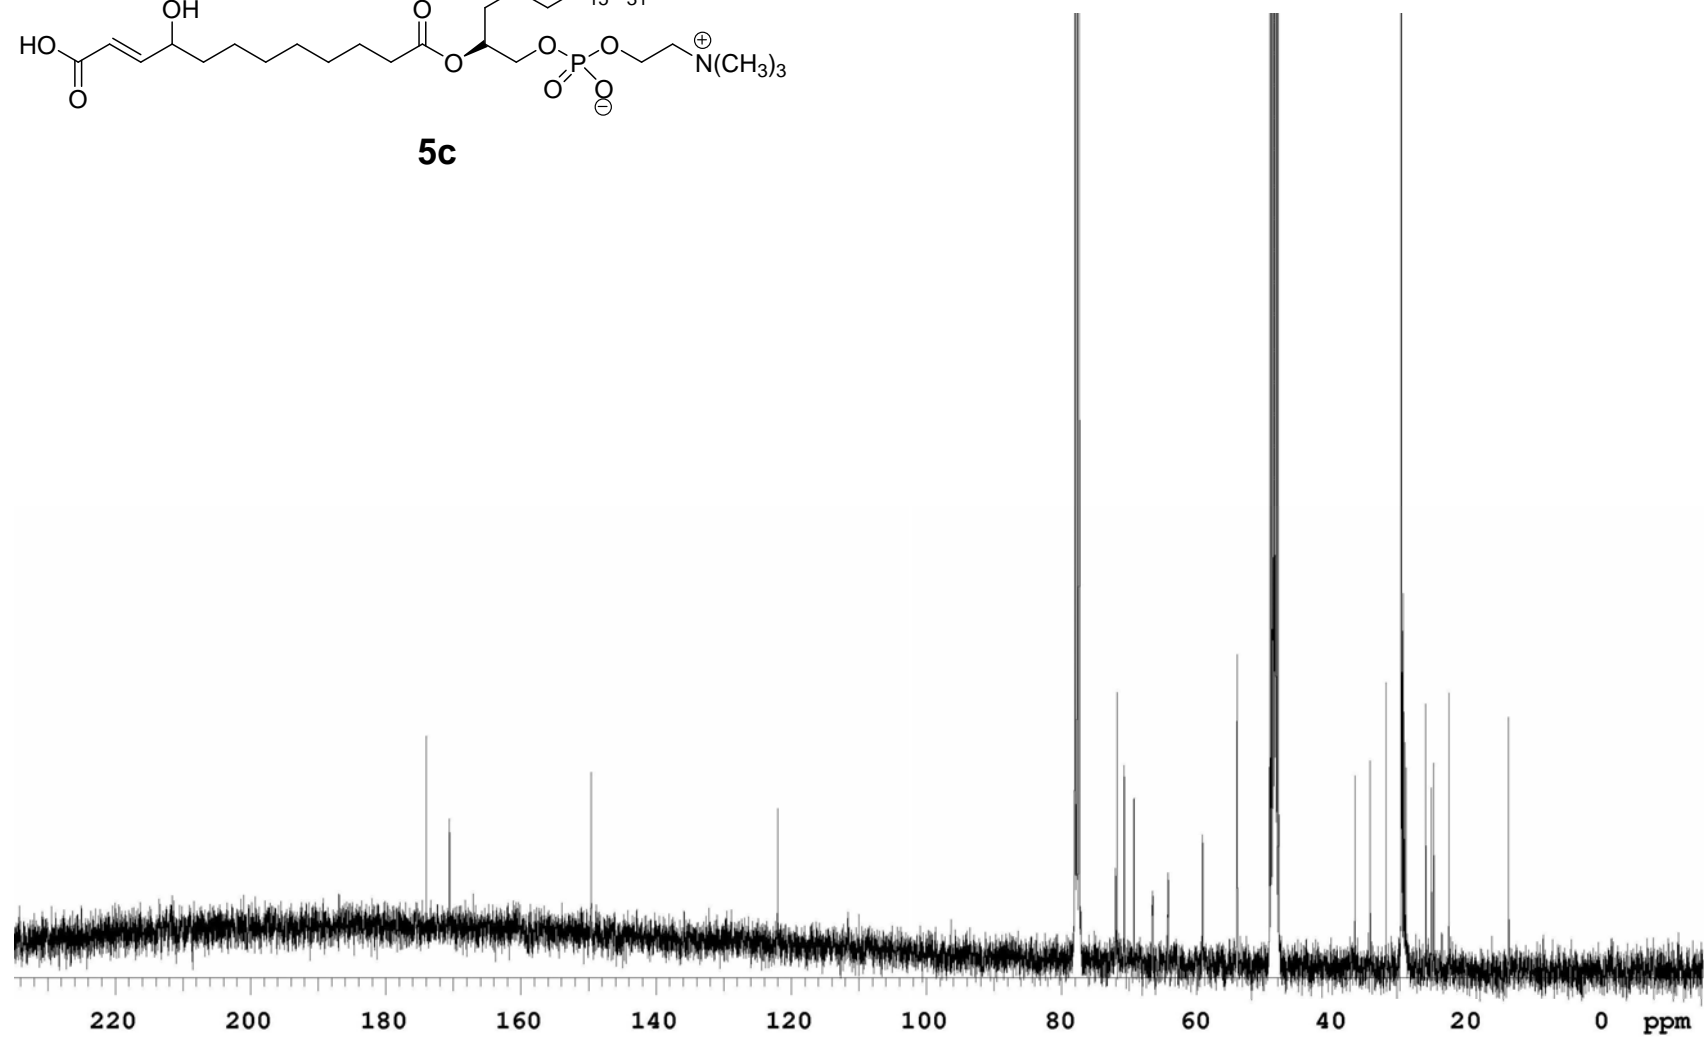

**Figure S54.**  $^{13}\text{C}$ -NMR (100 M,  $\text{CDCl}_3+\text{CD}_3\text{OD}$ ) of HDdiA-PAF (**5c**).

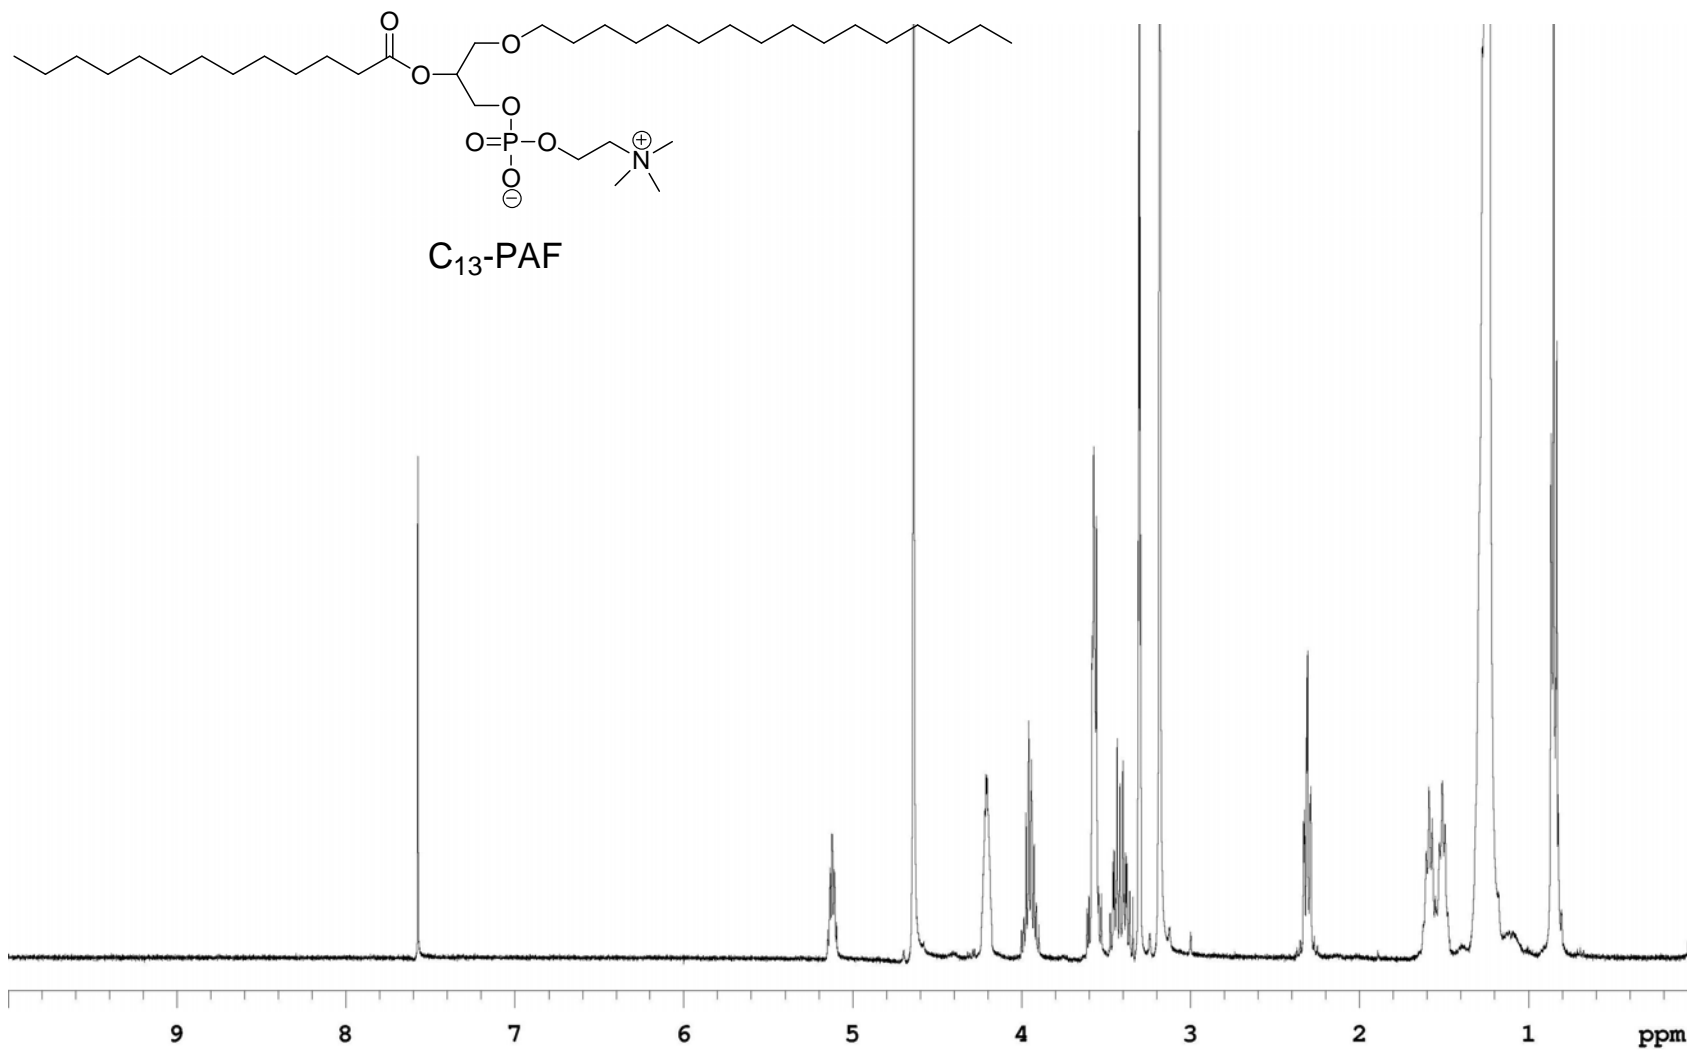

Figure S55. <sup>1</sup>H-NMR (400 M, CDCl<sub>3</sub>+CD<sub>3</sub>OD) of C<sub>13</sub>-PAF.

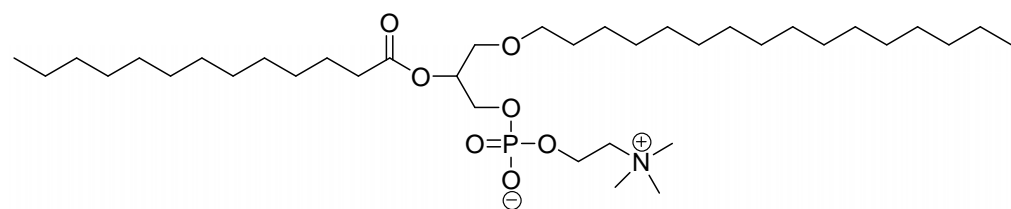

C<sub>13</sub>-PAF

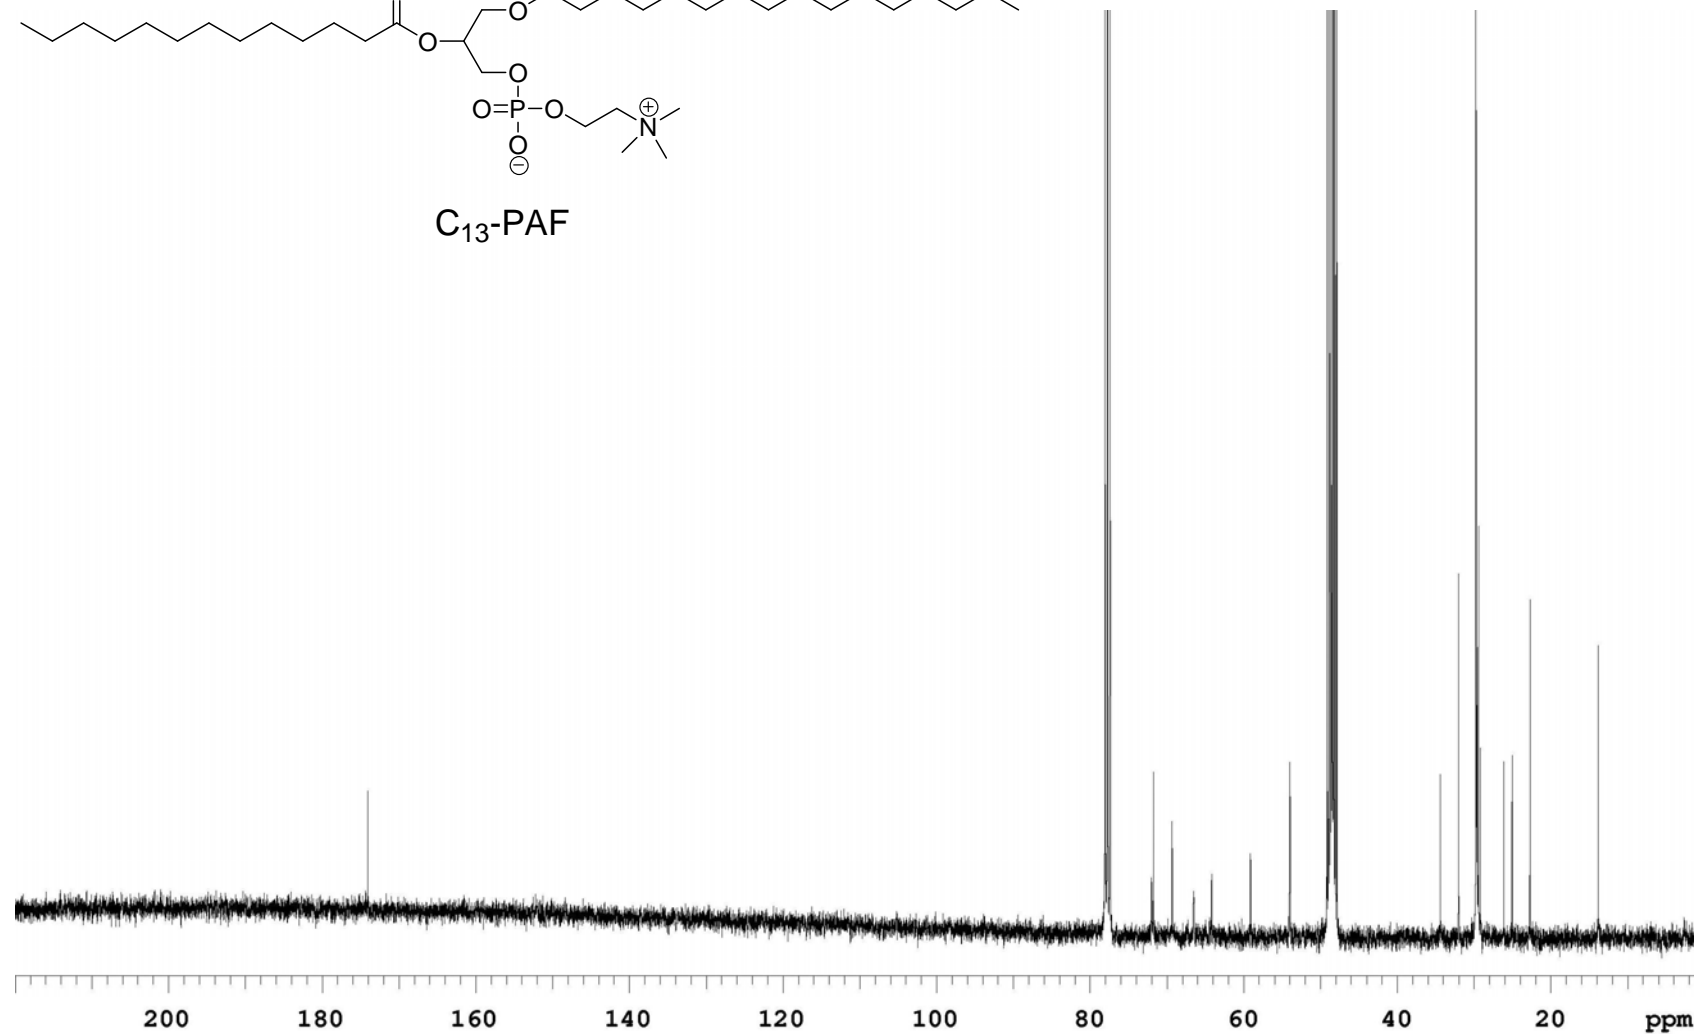

Figure S56. <sup>13</sup>C-NMR (100 M, CDCl<sub>3</sub>+CD<sub>3</sub>OD) of C<sub>13</sub>-PAF.

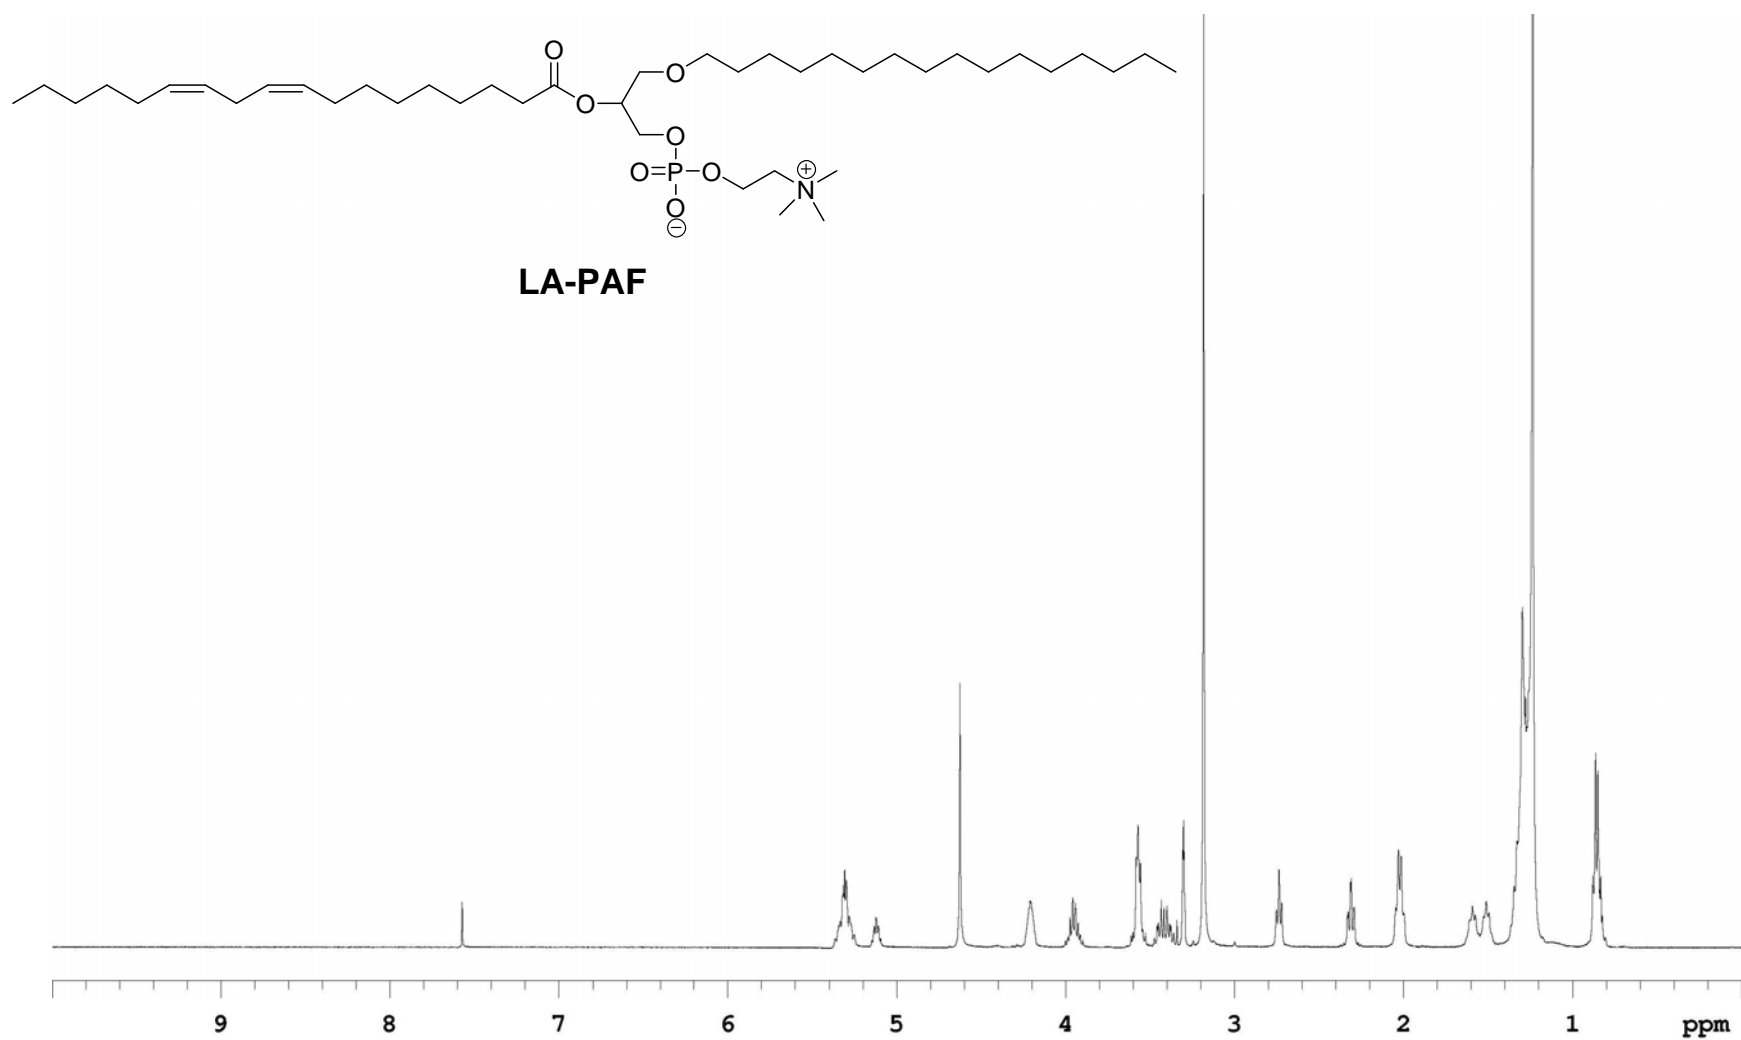

**Figure S57.** <sup>1</sup>H-NMR (400 M, CDCl<sub>3</sub>+CD<sub>3</sub>OD) of LA-PAF.

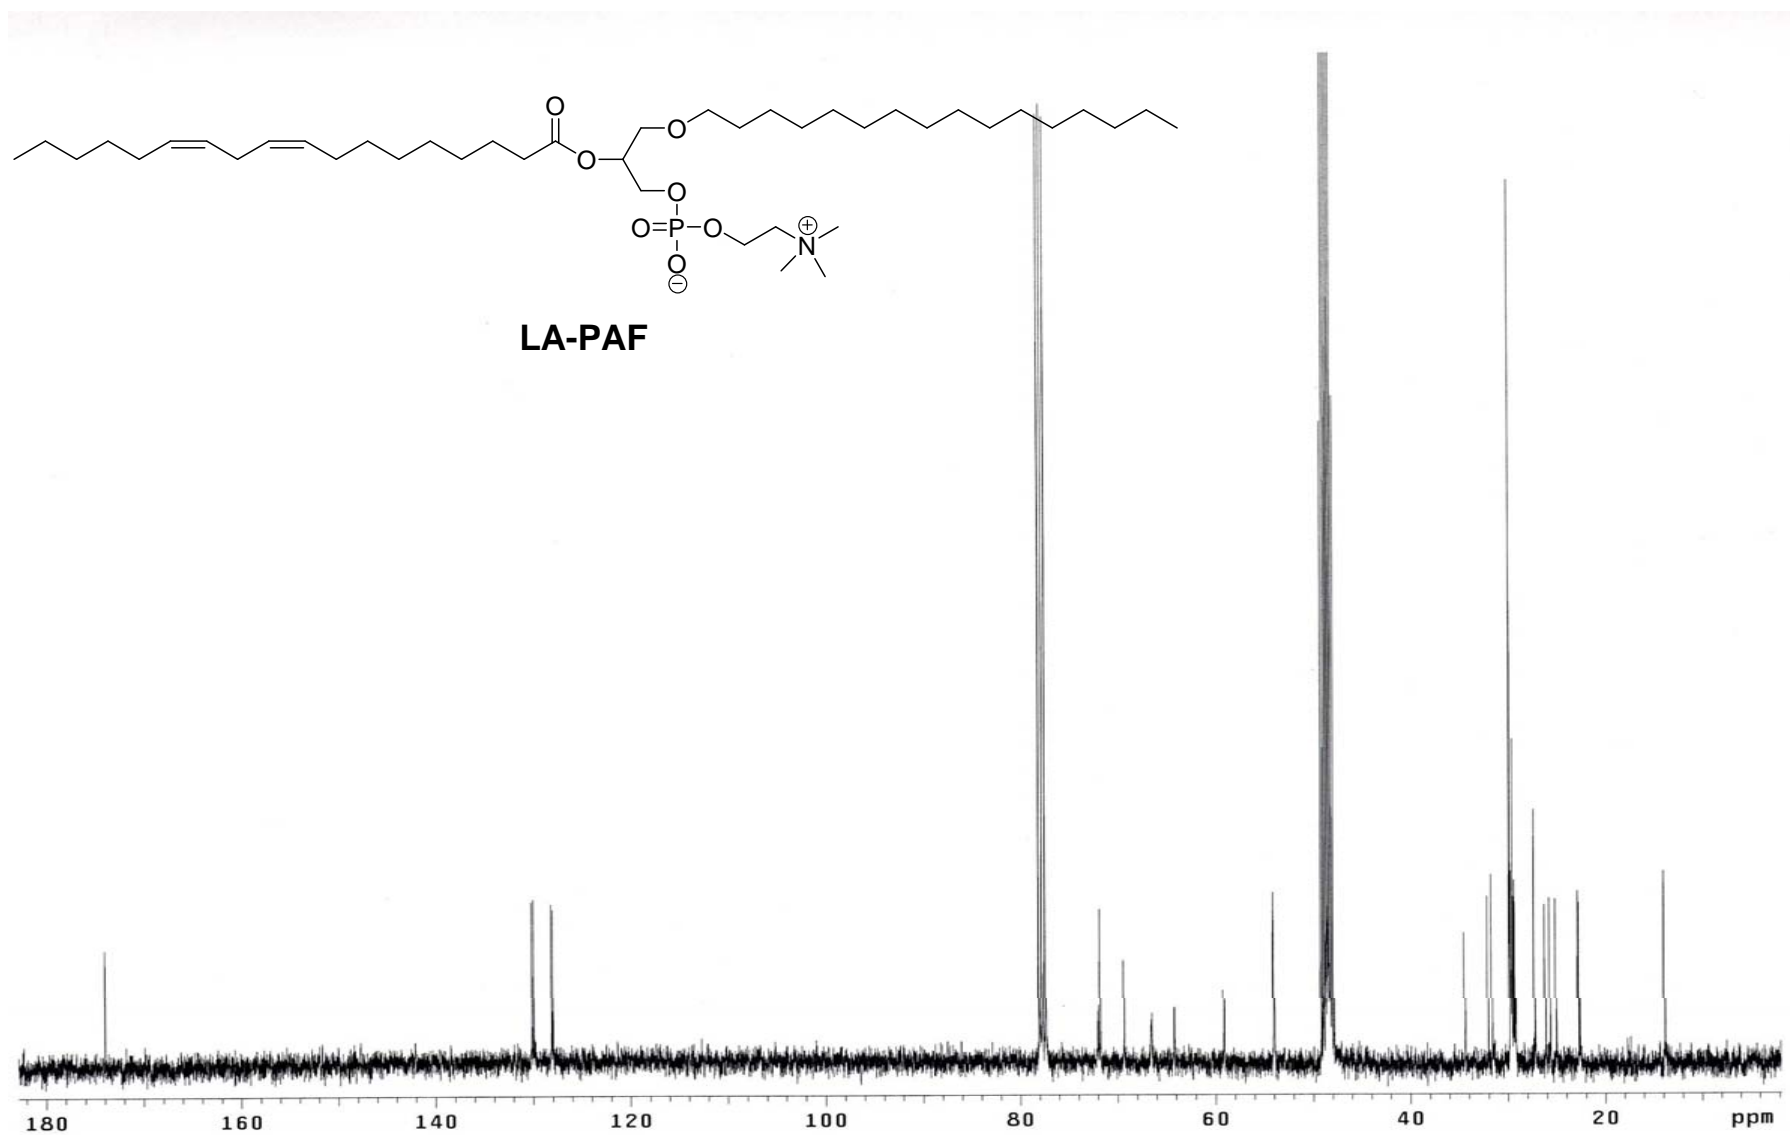

Figure S58. <sup>13</sup>C-NMR (100 M, CDCl<sub>3</sub>+CD<sub>3</sub>OD) of LA-PAF.

**Microphosphorus Assay.** The amount of synthetic lipid was calibrated with a standard microphosphorus assay,<sup>30</sup> which was modified to measure phospholipids at the level of 10 to 20 g of phospholipids. Lipid (15 – 25 g) was digested with 0.2 mL of perchloric acid (72 %) in a glass 5-mL disposable cell culture tube, which was heated to boiling in a sand bath. A yellow color appeared and then disappeared during the process. Water (2.1 mL), 0.1 mL of aqueous ammonium molybdate (5 %) and 0.1 mL of aqueous amidol reagent containing 1 % amidol (2, 4-diaminophenol dihydrochloride) and sodium bisulfite (20 %) were sequentially added to the tube, which was vortexed after the addition. The tube was covered with a beaker, and heated in a boiling water bath for 7 min. Then the tube was cooled, and the absorbance of the stable blue color was measured with a UV-vis spectrometer at 830 nm in a 1 cm cuvette after 15 min. A standard calibration curve was obtained using 0 g P, 0.5 g P, 1 g P, 2 g P, 4 g P obtained from a stock solution of  $\text{KH}_2\text{PO}_4$  (40 g P/ml).

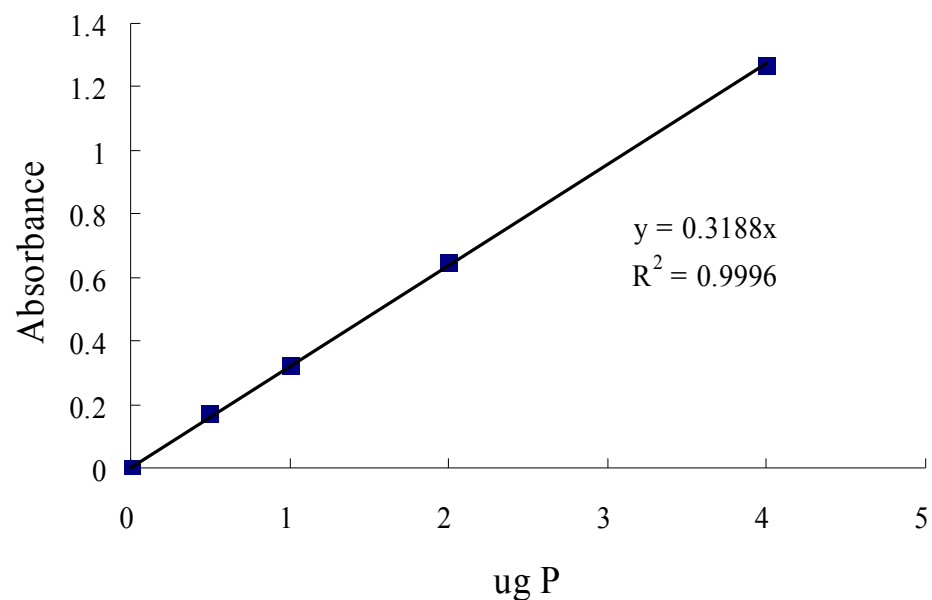

**Figure S59. Calibration curve for microphosphorus assay.**

**Percent Polyunsaturated<sup>a</sup> Lipids in Various Human Tissues**

|                                   | PC <sup>a</sup>                          | PE <sup>a</sup>                                        | PS <sup>a</sup>                                        | PL <sup>a</sup>                                                                 | L <sup>a</sup> |
|-----------------------------------|------------------------------------------|--------------------------------------------------------|--------------------------------------------------------|---------------------------------------------------------------------------------|----------------|
| <b>plasma</b>                     | 30(1)                                    |                                                        |                                                        | 47(2)                                                                           | 44±3(1), 45(3) |
| <b>low-density lipoprotein</b>    | 30(1)                                    |                                                        |                                                        |                                                                                 | 50±1(1)        |
| <b>high-density lipoprotein</b>   | 37(1)                                    |                                                        |                                                        |                                                                                 | 47±1(1)        |
| <b>red blood cells</b>            | 25(1),39(2)                              | 49(2)                                                  |                                                        | 47(2),36(4)                                                                     | 32±4(1)        |
| <b>platelets</b>                  | 32(1)                                    |                                                        |                                                        |                                                                                 | 41±1(1)        |
| <b>whole blood</b>                |                                          |                                                        |                                                        |                                                                                 | 36±5(1)        |
| <b>leukocytes</b>                 |                                          |                                                        |                                                        | 33(5)                                                                           |                |
| <b>fibroblasts</b>                | 25(6)                                    | 56(6)                                                  | 38(6)                                                  | 20(5) <sup>b</sup> , 30(5) <sup>c</sup> ,<br>30(7),31(8)                        | 28(9),46(8)    |
| <b>lymphocytes</b>                | 22(10)                                   | 53(10)                                                 |                                                        | 39(10)                                                                          | 38(11),40(3)   |
| <b>PBMC</b>                       |                                          |                                                        |                                                        | 50(12), 36(13)                                                                  |                |
| <b>monocyte</b>                   |                                          |                                                        |                                                        |                                                                                 | 37(11)         |
| <b>brain—white matter</b>         | 3(14),4(15),<br>3(16)                    | 26(14),19(15),<br>29(16)                               | 5(14),9(15)                                            |                                                                                 | 14(15)         |
| <b>brain—frontal gray</b>         | 4(16)                                    | 44(16)                                                 |                                                        |                                                                                 |                |
| <b>brain—hippocampus</b>          | 4(16)                                    | 42(16)                                                 |                                                        |                                                                                 |                |
| <b>brain—pons</b>                 | 1(16)                                    | 25(16)                                                 |                                                        |                                                                                 |                |
| <b>brain—temporal cortex</b>      |                                          |                                                        |                                                        | 31(17)                                                                          |                |
| <b>spinal cord</b>                | 4(18)                                    | 25(18)                                                 |                                                        |                                                                                 |                |
| <b>peripheral nerve</b>           | 5(18)                                    | 24(18)                                                 |                                                        |                                                                                 |                |
| <b>myelin</b>                     | 4(19)                                    | 28(19)                                                 |                                                        |                                                                                 |                |
| <b>axolemma</b>                   | 8(19)                                    | 37(19)                                                 |                                                        |                                                                                 |                |
| <b>retina</b>                     |                                          |                                                        |                                                        | 22(20) <sup>j</sup>                                                             |                |
| <b>retinal pigment epithelium</b> |                                          |                                                        |                                                        | 14(20) <sup>j</sup> ,44(21)                                                     |                |
| <b>Bruch's membrane/choroid</b>   |                                          |                                                        |                                                        | 18(20) <sup>j</sup>                                                             |                |
| <b>lipofuscin</b>                 |                                          |                                                        |                                                        | 33(21)                                                                          |                |
| <b>rod outer segments</b>         |                                          |                                                        |                                                        | 49(21)                                                                          |                |
| <b>neural retina</b>              |                                          |                                                        |                                                        | 36(21)                                                                          |                |
| <b>lens epithelium</b>            | 28(22)                                   |                                                        |                                                        |                                                                                 |                |
| <b>heart</b>                      | 38(23)                                   | 50(23)                                                 |                                                        |                                                                                 |                |
| <b>lung</b>                       | 30(24)                                   |                                                        |                                                        |                                                                                 |                |
| <b>bronchial epithelium</b>       |                                          |                                                        |                                                        | 19(25)                                                                          |                |
| <b>alveolar epithelium</b>        |                                          |                                                        |                                                        | 20(25)                                                                          |                |
| <b>LSA (from BALF)</b>            | 3(26)                                    |                                                        |                                                        |                                                                                 |                |
| <b>liver</b>                      |                                          |                                                        |                                                        |                                                                                 | 26(27)         |
| <b>liver microsomes</b>           | 40(28)                                   | 51(28)                                                 |                                                        |                                                                                 |                |
| <b>spermatozoa</b>                |                                          |                                                        |                                                        | 34±1(29) <sup>d</sup> ,26±1(29) <sup>e</sup>                                    |                |
| <b>placenta</b>                   | 36(30) <sup>f</sup> ,37(30),<br>40±1(31) | 51(30) <sup>f</sup> ,49(30) <sup>g</sup> ,<br>51±1(31) | 29(30) <sup>f</sup> ,37(30) <sup>g</sup> ,<br>29±1(31) | 39±1(31)                                                                        |                |
| <b>skeletal muscle</b>            |                                          |                                                        |                                                        | 53(32) <sup>h</sup> ,53(33),51(34),<br>48(35) <sup>l</sup> ,44(36) <sup>m</sup> |                |
| <b>vastus lateralis muscle</b>    |                                          |                                                        |                                                        | 53(37) <sup>k</sup>                                                             |                |
| <b>prostasome</b>                 | 2(38)                                    | 13(38)                                                 | 23(38)                                                 |                                                                                 |                |
| <b>HUVEC</b>                      | 36(39)                                   | 61(39)                                                 | 39(39)                                                 | 10(40), 32(41), 43(39)                                                          |                |
| <b>intestinal mucosa</b>          |                                          |                                                        |                                                        | 38(42)                                                                          |                |
| <b>colonocyte epithelium</b>      |                                          |                                                        |                                                        | 13(43)                                                                          |                |
| <b>buccal cheek cell</b>          |                                          |                                                        |                                                        | 24(44) <sup>i</sup>                                                             |                |

**Abbreviations:** FA , fatty acids; PC, phosphatidylcholine; PE, phosphatidylethanolamine; PS, phosphatidylserine; PL, phospholipids; L, lipids; HUVEC, human umbilical vein epithelial cells; PBMC, peripheral blood mononuclear cells; FBS, fetal bovine serum; HS, human serum; LSA, large surfactant aggregates; BALF, bronchoalveolar lavage fluid, <sup>a</sup> expressed as % of total or select FA detected, as specified in corresponding reference, <sup>b</sup>cell cultures supplemented with FBS, <sup>c</sup>cell cultures supplemented with HS, <sup>d</sup>from 47% Percoll, <sup>e</sup>from 90% Percoll, <sup>f</sup>from early placentae, <sup>g</sup>from term placentae, <sup>h</sup>an average from formula-fed, breast-fed, and non- or limited breast-fed infants, <sup>i</sup> an average of values for both 36- and 57-week infants, <sup>j</sup>an average of macula and periphery values, <sup>k</sup> an average of 8-, 14-, and 30-day untrained groups, <sup>l</sup> an average of 3 different age populations, <sup>m</sup>Values are an average of 4 different age populations .



1. Rise, P., S. Eligini, S. Ghezzi, S. Colli, and C. Galli. 2007. Fatty acid composition of plasma, blood cells and whole blood: relevance for the assessment of the fatty acid status in humans. *Prostaglandins, leukotrienes, and essential fatty acids* **76**: 363-369.
2. Manku, M. S., D. F. Horrobin, Y. S. Huang, and N. Morse. 1983. Fatty acids in plasma and red cell membranes in normal humans. *Lipids* **18**: 906-908.
3. Pina, P., M. Couturier, and F. Lemonnier. 1995. Fatty acid content in lymphocytes from children with syndromic paucity of interlobular bile ducts, Alagille syndrome. *Journal of inherited metabolic disease* **18**: 727-736.
4. VanderJagt, D. J., M. R. Trujillo, F. Bode-Thomas, Y. S. Huang, L. T. Chuang, and R. H. Glew. 2003. Phase angle correlates with n-3 fatty acids and cholesterol in red cells of Nigerian children with sickle cell disease. *Lipids in health and disease* **2**: 2.
5. Delplanque, B., and B. Jacotot. 1987. Influence of environmental medium on fatty acid composition of human cells: leukocytes and fibroblasts. *Lipids* **22**: 241-249.
6. Blom, T. S., M. Koivusalo, E. Kuismanen, R. Kostianen, P. Somerharju, and E. Ikonen. 2001. Mass spectrometric analysis reveals an increase in plasma membrane polyunsaturated phospholipid species upon cellular cholesterol loading. *Biochemistry* **40**: 14635-14644.
7. Gavino, V. C., J. S. Miller, J. M. Dillman, G. E. Milo, and D. G. Cornwell. 1981. Polyunsaturated fatty acid accumulation in the lipids of cultured fibroblasts and smooth muscle cells. *Journal of lipid research* **22**: 57-62.
8. Couturier, M., and F. Lemonnier. 1991. 2-Deoxy-D-glucose uptake and fatty acid content in fibroblast cultures from children with syndromic paucity of interlobular bile ducts (Alagille syndrome). *Journal of inherited metabolic disease* **14**: 215-227.
9. Williard, D. E., J. O. Nwankwo, T. L. Kaduce, S. D. Harmon, M. Irons, H. W. Moser, G. V. Raymond, and A. A. Spector. 2001. Identification of a fatty acid delta6-desaturase deficiency in human skin fibroblasts. *Journal of lipid research* **42**: 501-508.
10. Bougnoux, P., N. Salem, C. Lyons, and T. Hoffman. 1985. Alteration in the membrane fatty acid composition of human lymphocytes and cultured transformed cells induced by interferon. *Molecular immunology* **22**: 1107-1113.
11. Barbieri, B., G. Alvelius, and N. Papadogiannakis. 1998. Lower arachidonic acid content and preferential beta-oxidation of arachidonic acid over palmitic acid in tumour cell lines as compared to normal lymphoid cells. *Biochemistry and molecular biology international* **45**: 1105-1112.
12. Diaz, O., A. Berquand, M. Dubois, S. Di Agostino, C. Sette, S. Bourgoin, M. Lagarde, G. Nemoz, and A. F. Prigent. 2002. The mechanism of docosahexaenoic acid-induced phospholipase D activation in human lymphocytes involves exclusion of the enzyme from lipid rafts. *The Journal of biological chemistry* **277**: 39368-39378.
13. Bechoua, S., M. Dubois, Z. Dominguez, A. Goncalves, G. Nemoz, M. Lagarde, and A. F. Prigent. 1999. Protective effect of docosahexaenoic acid against hydrogen peroxide-induced oxidative stress in human lymphocytes. *Biochemical pharmacology* **57**: 1021-1030.
14. Wilson, R., and M. V. Bell. 1993. Molecular species composition of glycerophospholipids from white matter of human brain. *Lipids* **28**: 13-17.
15. Wilson, R., and D. R. Tocher. 1991. Lipid and fatty acid composition is altered in plaque tissue from multiple sclerosis brain compared with normal brain white matter. *Lipids* **26**: 9-15.
16. Soderberg, M., C. Edlund, K. Kristensson, and G. Dallner. 1991. Fatty acid composition of brain phospholipids in aging and in Alzheimer's disease. *Lipids* **26**: 421-425.
17. Julien, C., L. Berthiaume, A. Hadj-Tahar, A. H. Rajput, P. J. Bedard, T. Di Paolo, P. Julien, and F. Calon. 2006. Postmortem brain fatty acid profile of levodopa-treated Parkinson disease patients and parkinsonian monkeys. *Neurochemistry international* **48**: 404-414.
18. Svennerholm, L., K. Bostrom, P. Fredman, B. Jungbjer, J. E. Mansson, and B. M. Rynmark. 1992. Membrane lipids of human peripheral nerve and spinal cord. *Biochimica et biophysica acta* **1128**: 1-7.
19. DeVries, G. H., W. J. Zetusky, C. Zmachinski, and V. P. Calabrese. 1981. Lipid composition of axolemma-enriched fractions from human brains. *Journal of lipid research* **22**: 208-216.
20. Gulcan, H. G., R. A. Alvarez, M. B. Maude, and R. E. Anderson. 1993. Lipids of human retina, retinal pigment epithelium, and Bruch's membrane/choroid: comparison of macular and peripheral regions. *Investigative ophthalmology & visual science* **34**: 3187-3193.
21. Bazan, H. E., N. G. Bazan, L. Feeney-Burns, and E. R. Berman. 1990. Lipids in human lipofuscin-enriched subcellular fractions of two age populations. Comparison with rod outer segments and neural retina. *Investigative ophthalmology & visual science* **31**: 1433-1443.
22. Huang, L., M. C. Yappert, J. J. Miller, and D. Borchman. 2007. Thyroxine ameliorates oxidative stress by inducing lipid compositional changes in human lens epithelial cells. *Investigative ophthalmology & visual science* **48**: 3698-3704.
23. Rocquelin, G., L. Guenot, P. O. Astorg, and M. David. 1989. Phospholipid content and fatty acid composition of human heart. *Lipids* **24**: 775-780.
24. Nakamura, M., T. Onodera, and T. Akino. 1980. Characteristics of phospholipids in human lung carcinoma. *Lipids* **15**: 616-623.

25. Bryan, D. L., P. Hart, K. Forsyth, and R. Gibson. 2001. Incorporation of alpha-linolenic acid and linoleic acid into human respiratory epithelial cell lines. *Lipids* **36**: 713-717.
26. Schmidt, R., U. Meier, P. Markart, F. Grimminger, H. G. Velcovsky, H. Morr, W. Seeger, and A. Gunther. 2002. Altered fatty acid composition of lung surfactant phospholipids in interstitial lung disease. *American journal of physiology* **283**: L1079-1085.
27. Pawlosky, R. J., and N. Salem, Jr. 2004. Perspectives on alcohol consumption: liver polyunsaturated fatty acids and essential fatty acid metabolism. *Alcohol (Fayetteville, N.Y)* **34**: 27-33.
28. Waskell, L., D. Koblin, and E. Canova-Davis. 1982. The lipid composition of human liver microsomes. *Lipids* **17**: 317-320.
29. Zalata, A. A., A. B. Christophe, C. E. Depuydt, F. Schoonjans, and F. H. Comhaire. 1998. The fatty acid composition of phospholipids of spermatozoa from infertile patients. *Molecular human reproduction* **4**: 111-118.
30. Bitsanis, D., M. A. Crawford, T. Moodley, H. Holmsen, K. Ghebremeskel, and O. Djahanbakhch. 2005. Arachidonic acid predominates in the membrane phosphoglycerides of the early and term human placenta. *The Journal of nutrition* **135**: 2566-2571.
31. Bayon, Y., M. Croset, V. Chirouze, J. L. Tayot, and M. Lagarde. 1993. Phospholipid molecular species from human placenta lipids. *Lipids* **28**: 631-636.
32. Baur, L. A., J. O'Connor, D. A. Pan, A. D. Kriketos, and L. H. Storlien. 1998. The fatty acid composition of skeletal muscle membrane phospholipid: its relationship with the type of feeding and plasma glucose levels in young children. *Metabolism: clinical and experimental* **47**: 106-112.
33. Felton, C. V., J. C. Stevenson, and I. F. Godsland. 2004. Erythrocyte-derived measures of membrane lipid composition in healthy men: associations with arachidonic acid at low to moderate but not high insulin sensitivity. *Metabolism: clinical and experimental* **53**: 571-577.
34. Vessby, B., S. Tengblad, and H. Lithell. 1994. Insulin sensitivity is related to the fatty acid composition of serum lipids and skeletal muscle phospholipids in 70-year-old men. *Diabetologia* **37**: 1044-1050.
35. Aldamiz-Echevarria, L., J. A. Prieto, F. Andrade, J. Elorz, P. Sanjurjo, and J. Rodriguez Soriano. 2007. Arachidonic acid content in adipose tissue is associated with insulin resistance in healthy children. *Journal of pediatric gastroenterology and nutrition* **44**: 77-83.
36. Sanjurjo, P., L. Aldamiz-Echevarria, C. Prado, I. Azcona, J. Elorz, J. A. Prieto, J. I. Ruiz, and J. Rodriguez-Soriano. 2006. Fatty acid composition of skeletal muscle and adipose tissue in Spanish infants and children. *The British journal of nutrition* **95**: 168-173.
37. Helge, J. W., and F. Dela. 2003. Effect of training on muscle triacylglycerol and structural lipids: a relation to insulin sensitivity? *Diabetes* **52**: 1881-1887.
38. Arienti, G., E. Carlini, A. Polci, E. V. Cosmi, and C. A. Palmerini. 1998. Fatty acid pattern of human prostasome lipid. *Archives of biochemistry and biophysics* **358**: 391-395.
39. Vossen, R. C., M. A. Feijge, J. W. Heemskerk, M. C. van Dam-Mieras, G. Hornstra, and R. F. Zwaal. 1993. Long-term fatty acid modification of endothelial cells: implications for arachidonic acid distribution in phospholipid classes. *Journal of lipid research* **34**: 409-420.
40. Carluccio, M. A., M. Massaro, C. Bonfrate, L. Siculella, M. Maffia, G. Nicolardi, A. Distanti, C. Storelli, and R. De Caterina. 1999. Oleic acid inhibits endothelial activation : A direct vascular antiatherogenic mechanism of a nutritional component in the mediterranean diet. *Arteriosclerosis, thrombosis, and vascular biology* **19**: 220-228.
41. Spector, A. A., T. L. Kaduce, J. C. Hoak, and G. L. Fry. 1981. Utilization of arachidonic and linoleic acids by cultured human endothelial cells. *The Journal of clinical investigation* **68**: 1003-1011.
42. Steel, D. M., W. Ryd, H. Ascher, and B. Strandvik. 2006. Abnormal fatty acid pattern in intestinal mucosa of children with celiac disease is not reflected in serum phospholipids. *Journal of pediatric gastroenterology and nutrition* **43**: 318-323.
43. Dias, V. C., J. L. Wallace, and H. G. Parsons. 1992. Modulation of cellular phospholipid fatty acids and leukotriene B4 synthesis in the human intestinal cell (CaCo-2). *Gut* **33**: 622-627.
44. Hoffman, D. R., E. E. Birch, D. G. Birch, and R. Uauy. 1999. Fatty acid profile of buccal cheek cell phospholipids as an index for dietary intake of docosahexaenoic acid in preterm infants. *Lipids* **34**: 337-342.
